# Supplementary material for: Shared Genetic Architecture Between COVID-19 Severity and Alzheimer's Disease Across European and African Ancestries
Source: Research Square preprint supplement (doi:10.21203/rs.3.rs-5619229/v1), 2024-12-24
Supplement: Supplementary file 1 [file a54aa1f83516e278a73e732d.xlsx]

## Sheet: Contents
Overview of the Supplementary Tables
Tables	Title
Table S1	Association between best-PRSs for COVID-19 and AD adjusted with sex, age, and APOE genotypes in the EA population
Table S2	Association between best-PRSs for COVID-19 and AD adjusted with sex, age, and APOE genotypes in AA population
Table S3	Linear regression of APOE genotypes with PRSs of COVID-19 phenotypes in both EA and AA populations
Table S4	No Causal relationships from COVID-19 to AD in EA or AA population
Table S5	Shared significant SNPs between AD and COVID-19 A2 and B2 in the EA population
Table S6	Shared SNPs reached nominal associations between AD and COVID-19 in the AA population
Table S7	List of nonsynonymous SNPs in the shared chr17q21.31 region
Table S8	rs12373123 phenome-wide association study from GWAS ATLAS
Table S9	rs199515 phenome-wide association study from GWAS ATLAS

## Sheet: S1
Supplementary Table 1. Association between best-PRSs for COVID-19 and AD adjusted with sex, age, and APOE genotypes in the EA population
	COVID-19 SNPs	Variables	BETA	SE	Z-value	P	OR(95%CI)
	HGI7_A2	sex	0.114919	0.0598986	1.91856	0.0550396	1.122(0.998-1.262)
		age	0.0671888	0.00337386	19.9145	3.04671e-88	1.069(1.062-1.077)
		rs429358_C	1.32766	0.0512444	25.9083	5.36418e-148	3.772(3.414-4.174)
		rs7412_T	-0.512697	0.0971488	-5.27744	1.30998e-07	0.599(0.494-0.724)
		PRS at "Best-fit"	0.0973125	0.0289907	3.35668	0.000788852	1.102(1.041-1.167)
	HGI7_B2	sex	0.117729	0.0598832	1.96598	0.0493014	1.125(1.000-1.265)
		age	0.0671052	0.00337303	19.8946	4.53048e-88	1.069(1.062-1.077)
		rs429358_C	1.32791	0.0512174	25.9269	3.31221e-148	3.773(3.415-4.175)
		rs7412_T	-0.509282	0.0970795	-5.24603	1.55413e-07	0.601(0.496-0.726)
		PRS at "Best-fit"	0.0742722	0.0289769	2.56315	0.0103727	1.077(1.018-1.140)
	HGI7_C2	sex	0.110496	0.0599865	1.84201	0.0654739	1.117(0.993-1.256)
		age	0.0669546	0.00337614	19.8317	1.58599e-87	1.069(1.062-1.076)
		rs429358_C	1.33096	0.05135	25.9193	4.03455e-148	3.785(3.425-4.189)
		rs7412_T	-0.515355	0.097254	-5.29906	1.16398e-07	0.597(0.493-0.722)
		PRS at "Best-fit"	0.138678	0.0290442	4.7747	1.79971e-06	1.149(1.085-1.216)
Note: PRSs at "Best-fit" threshold are adjusted for each of the variables (sex, age, APOE SNPs). APOE SNPs are represented by rs429358_C and rs7412_T.

## Sheet: S2
Supplementary Table 2. Association between best-PRSs for COVID-19 and AD adjusted with sex, age, and APOE genotypes in AA population
	COVID-19 Phenotypes	Variables	coeff.	SE	Z-value	P	OR(95%CI)
	HGI7_A2	sex	0.0794467	0.122593	0.648055	0.516949	1.083(0.853-1.380)
		age	0.0317671	0.00748917	4.24174	2.21798e-05	1.032(1.017-1.048)
		rs429358_C	0.64517	0.0930607	6.93279	4.12619e-12	1.906(1.588-2.288)
		rs7412_T	-0.163817	0.149185	-1.09808	0.272171	0.849(0.629-1.129)
		PRS at "Best-fit"	0.524773	0.053232	9.85821	6.31636e-23	1.690(1.523-1.877)
	HGI7_B2	sex	0.095717	0.120258	0.795932	0.426072	1.100(0.871-1.396)
		age	0.0454661	0.00740074	6.14346	8.07451e-10	1.047(1.032-1.062)
		rs429358_C	0.607163	0.0909646	6.67473	2.47695e-11	1.835(1.535-2.193)
		rs7412_T	-0.230205	0.146221	-1.57436	0.115404	0.794(0.592-1.050)
		PRS at "Best-fit"	0.217708	0.055566	3.91801	8.92841e-05	1.243(1.115-1.386)
	HGI7_C2	sex	0.085182	0.120394	0.707527	0.479239	1.089(0.862-1.382)
		age	0.0436931	0.0073881	5.91399	3.33918e-09	1.045(1.030-1.060)
		rs429358_C	0.614089	0.0910372	6.74547	1.52529e-11	1.848(1.545-2.209)
		rs7412_T	-0.198107	0.146103	-1.35594	0.175118	0.820(0.611-1.084)
		PRS at "Best-fit"	0.248391	0.0554266	4.48143	7.41441e-06	1.282(1.150-1.429)
Note: Utalization of Multivariate Logistic Regression with Covariates. Variables: Covariates applied (Sex, Age, rs429358_c, rs7412_T, and PRS Best Score). rs429358-C: APOE ε4 variant rs429358-C. rs7412_T: APOE ε4 variant rs7412_T. Coeff: Coefficient of the model. SE: standard error. z value: ratio of the estimated coefficient to standard error. P: p-value of model fit for the association. OR: Odd…

## Sheet: S3
Supplementary Table 3. Linear regression of APOE genotypes with PRSs of COVID-19 phenotypes in both EA and AA populations
	APOE Genotype	Ancestry	Phenotype	Estimate	SE	t value	Pr(>|t|)	OR (95%CI)
	rs429358_C	EA	A2	0.00881839	0.0204194	0.431863	0.665857	1.009(0.969-1.050)
			B2	-0.00925586	0.0204194	-0.453288	0.650358	0.991(0.952-1.031)
			C2	0.00308124	0.0204197	0.150896	0.880063	1.003(0.964-1.044)
		AA	A2	-0.048789	0.0333967	-1.46089	0.144164	0.952(0.892-1.017)
			B2	0.024253	0.0334069	0.725988	0.46791	1.025(0.960-1.094)
			C2	-0.042701	0.0333999	-1.27848	0.201194	0.958(0.897-1.023)
	rs7412_T	EA	A2	-0.0275384	0.0422105	-0.652405	0.514165	0.973(0.896-1.057)
			B2	-0.0393071	0.0422089	-0.93125	0.351763	0.961(0.885-1.044)
			C2	0.0142754	0.0422116	0.338186	0.735235	1.014(0.934-1.102)
		AA	A2	-0.083783	0.04492	-1.86516	0.0622693	0.920(0.842-1.004)
			B2	0.0143604	0.0449486	0.319485	0.749384	1.014(0.929-1.108)
			C2	-0.0798551	0.0449227	-1.77761	0.0755823	0.923(0.845-1.008)
Note: Linear model produced between a selected APOE Genotype and individual COVID-19 phenotype by ancestry. APOE: Apolipoprotein E. rs429358-C: APOE ε4 variant rs429358-C. rs7412_T: APOE ε4 variant rs7412_T. ALL: Multi-ethnic population. EA: European Ancestry. AA: African Ancestry. Estimate: estimation of coefficients. SE: standard error. t-value: size of the difference relative to the variation.…

## Sheet: S4
Supplementary Table 4. No Causal relationships from COVID-19 to AD in EA or AA population
Exposure and Outcome Information			Primary MR Analysis				Cochran's Q Test			MR-Egger Intercept Test			Steiger Directionality Test
Ancestry	Outcome	COVID Exposure	Method	# IVs	OR (95%CI)	P-Value	Q-Value	Q-DoF	P-Value	Egger Intercept	SE	P-Value	R2 Exposure	R2 Outcome	Correct Direction?	Steiger P-Value
European Ancestry (EA)	Clinically Diagnosed Alzheimer's Disease (Kunkle 2019)	Critical Illness (A2)	Inverse variance weighted	28	0.999 (0.949-1.052)	0.960983	40.9987	27	0.0411975				0.0022924	0.000664703	TRUE	5.5124e-08
			MR Egger	28	0.963 (0.877-1.058)	0.439758	39.7409	26	0.0413552	0.00706623	0.00778957	0.372664
			Weighted median	28	0.975 (0.916-1.037)	0.419333
		Hospitalization (B2)	Inverse variance weighted	33	0.982 (0.91-1.06)	0.641772	52.0069	32	0.014147				0.0012489	0.000818088	TRUE	0.093191
			MR Egger	33	0.934 (0.809-1.08)	0.364892	50.9668	31	0.0133804	0.00607816	0.00764174	0.432435
			Weighted median	33	0.961 (0.873-1.059)	0.424954
		Infection (C2)	Inverse variance weighted	14	1.008 (0.812-1.251)	0.945247	21.6367	13	0.0612537				0.000664386	0.000371321	TRUE	0.104076
			MR Egger	14	1.077 (0.707-1.639)	0.736142	21.3979	12	0.0448482	-0.00409703	0.0111976	0.720821
			Weighted median	14	0.977 (0.778-1.229)	0.844901
	Alzheimer's Disease + Proxy AD (Self-Reported Family History) (Bellenguez 2022)	Critical Illness (A2)	Inverse variance weighted	27	1.034 (0.992-1.078)	0.117708	79.5286	26	2.47773e-07				0.00225919	0.000183896	TRUE	4.11079e-86
			MR Egger	27	0.992 (0.92-1.071)	0.844332	74.8315	25	7.19873e-07	0.00789382	0.0063015	0.221911
			Weighted median	27	0.999 (0.963-1.037)	0.956804
		Hospitalization (B2)	Inverse variance weighted	32	1.045 (0.988-1.106)	0.123976	86.1894	31	4.26292e-07				0.00123002	0.000190079	TRUE	1.25485e-40
			MR Egger	32	1.006 (0.903-1.121)	0.918189	84.2796	30	4.70586e-07	0.00474549	0.00575568	0.41617
			Weighted median	32	0.998 (0.948-1.052)	0.952759
		Infection (C2)	Inverse variance weighted	13	0.979 (0.895-1.072)	0.651357	6.22179	12	0.904491				0.000637519	1.58504e-05	TRUE	4.03074e-42
			MR Egger	13	0.977 (0.836-1.141)	0.772424	6.22012	11	0.85828	0.000184267	0.00451219	0.968157
			Weighted median	13	0.964 (0.855-1.087)	0.548614
African Ancestry (AA)	Clinically Diagnosed Alzheimer's Disease Model 1: Adjusted for age, sex, and genetic PCs (Kunkle 2021)	Critical Illness (A2)	Inverse variance weighted	11	0.967(0.888-2.457)	0.436607	5.64202	10	0.84439				0.0214197	0.000780599	TRUE	7.92623e-17
			MR Egger	11	1.104(0.902-2.256)	0.362362	3.64256	9	0.933327	-0.0679763	0.0480731	0.191002
			Weighted median	11	0.949(0.847-2.19)	0.370221
		Hospitalization (B2)	Inverse variance weighted	33	1.006(0.913-6.14)	0.900599	23.0001	32	0.878291				0.00640344	0.00287463	TRUE	0.0215966
			MR Egger	33	0.933(0.766-2.895)	0.491263	22.2382	31	0.87539	0.0251737	0.0288394	0.389433
			Weighted median	33	0.979(0.858-4.621)	0.746818
		Infection (C2)	Inverse variance weighted	31	0.902(0.764-1.692)	0.224908	21.8892	30	0.858043				0.0054692	0.00291739	TRUE	0.082082
			MR Egger	31	0.955(0.708-5.224)	0.765591	21.6867	29	0.832927	-0.0111081	0.0246852	0.656062
			Weighted median	31	0.911(0.726-2.571)	0.422549
	Clinically Diagnosed Alzheimer's Disease Model 2: Adjusted for age, sex, genetic PCs, and APOE genotype (Kunkle 2021)	Critical Illness (A2)	Inverse variance weighted	11	0.978(0.901-3.327)	0.592046	4.67999	10	0.911505				0.0214197	0.000620775	TRUE	1.30347e-17
			MR Egger	11	1.019(0.848-5.744)	0.844024	4.43808	9	0.880291	-0.0222563	0.045251	0.634604
			Weighted median	11	0.976(0.872-3.953)	0.671907
		Hospitalization (B2)	Inverse variance weighted	33	1.027(0.932-3.319)	0.586665	28.6514	32	0.636807				0.00640344	0.00361562	TRUE	0.0833904
			MR Egger	33	0.949(0.78-3.603)	0.602974	27.807	31	0.631112	0.0263034	0.028624	0.365228
			Weighted median	33	1.002(0.877-7.296)	0.979298
		Infection (C2)	Inverse variance weighted	31	0.915(0.772-2.002)	0.309786	27.0157	30	0.622446				0.0054692	0.00350206	TRUE	0.197479
			MR Egger	31	1.066(0.782-4.531)	0.690362	25.684	29	0.642325	-0.0284935	0.0246907	0.257915
			Weighted median	31	0.92(0.721-3.008)	0.498605

## Sheet: S5
Supplementary Table 5. Shared significant SNPs between AD and COVID-19 A2 and B2 in the EA population
			AD-EA						COVID-19											43757450
SNP	CHR	BP(GRCh37)	EA	OA	EAF	P	BETA	SE	EA	OA	EAF	p	BETA	SE	COVID19_phenotype	Gene	SameDirection?	rs3912061	17	44165098
rs55974014	17	43757450	A	C	0.2188	1.72e-08	-0.056	0.0099	A	C	0.1787	3.22e-13	-0.12455	0.017097	A2	LINC02210-CRHR1	yes	rs1378358	17	44787312
rs78471340	17	43768346	A	G	0.2252	4.51e-08	-0.0536	0.0098	A	G	0.1829	1.57e-13	-0.12443	0.016858	A2	LINC02210-CRHR1	yes
rs78052495	17	43768347	T	C	0.2252	4.58e-08	-0.0535	0.0098	T	C	0.1829	1.75e-13	-0.12418	0.016857	A2	LINC02210-CRHR1	yes			622214	1029862
rs968028	17	43781105	A	G	0.7743	4.81e-08	0.0534	0.0098	G	A	0.1815	8.64e-12	-0.1221	0.017883	A2	LINC02210-CRHR1	yes				1000000
rs62056879	17	43781426	T	C	0.7743	4.62e-08	0.0534	0.0098	C	T	0.1833	5.92e-14	-0.12649	0.016843	A2	LINC02210-CRHR1	yes
rs62056905	17	43782693	A	G	0.773	2.97e-08	0.0541	0.0098	G	A	0.1838	2.18e-14	-0.1285	0.016821	A2	LINC02210-CRHR1	yes				2059724
rs62056912	17	43784948	T	G	0.2257	4.95e-08	-0.0533	0.0098	T	G	0.1833	1.52e-13	-0.12438	0.016843	A2	LINC02210-CRHR1	yes
rs62056913	17	43784994	T	C	0.2249	4.39e-08	-0.0536	0.0098	T	C	0.183	4.79e-14	-0.1271	0.016863	A2	LINC02210-CRHR1	yes
rs56290582	17	43788371	T	C	0.2257	4.87e-08	-0.0533	0.0098	T	C	0.1834	1.28e-13	-0.12472	0.016836	A2	LINC02210-CRHR1	yes
rs62056930	17	43789640	A	C	0.7741	4.71e-08	0.0534	0.0098	C	A	0.1836	5.36e-14	-0.12677	0.016852	A2	LINC02210-CRHR1	yes
rs62056931	17	43789698	A	G	0.2241	3.61e-08	-0.054	0.0098	A	G	0.1822	5.26e-14	-0.12728	0.016914	A2	LINC02210-CRHR1	yes
rs56220242	17	43792326	T	C	0.2257	4.72e-08	-0.0534	0.0098	T	C	0.1833	8.29e-14	-0.12563	0.016828	A2	LINC02210-CRHR1	yes
rs56160448	17	43792358	A	G	0.7743	4.65e-08	0.0534	0.0098	G	A	0.1833	8.88e-14	-0.12548	0.016828	A2	LINC02210-CRHR1	yes
rs1880749	17	43792586	A	C	0.7743	4.79e-08	0.0533	0.0098	C	A	0.1834	6.12e-14	-0.12629	0.016827	A2	LINC02210-CRHR1	yes
rs1568951	17	43792895	T	G	0.7743	4.83e-08	0.0533	0.0098	G	T	0.1834	9.9e-14	-0.12525	0.01683	A2	LINC02210-CRHR1	yes
rs1568950	17	43792896	T	C	0.7743	4.75e-08	0.0533	0.0098	C	T	0.1834	1.01e-13	-0.12521	0.016832	A2	LINC02210-CRHR1	yes
rs55838058	17	43798902	T	C	0.2251	4.01e-08	-0.0537	0.0098	T	C	0.1825	1.06e-13	-0.12521	0.016844	A2	LINC02210-CRHR1	yes
rs56062621	17	43798903	A	G	0.7749	4.04e-08	0.0537	0.0098	G	A	0.1825	7.31e-14	-0.12603	0.016844	A2	LINC02210-CRHR1	yes
rs11079721	17	43840107	A	C	0.2258	4.68e-08	-0.0533	0.0098	A	C	0.1834	2.49e-13	-0.1231	0.016818	A2	LINC02210-CRHR1	yes
rs62055900	17	43845002	C	G	0.7744	4.94e-08	0.0532	0.0098	G	C	0.1903	6.79e-14	-0.12619	0.016844	A2	LINC02210-CRHR1	yes
rs62055901	17	43845041	A	G	0.2257	4.99e-08	-0.0532	0.0098	A	G	0.1834	7.55e-14	-0.12577	0.016819	A2	LINC02210-CRHR1	yes
rs62055928	17	43847374	A	G	0.2256	4.8e-08	-0.0533	0.0098	A	G	0.1834	6.53e-14	-0.12609	0.016819	A2	LINC02210-CRHR1	yes
rs62055932	17	43848412	A	G	0.7749	3.62e-08	0.0539	0.0098	G	A	0.1832	6.49e-14	-0.1264	0.016859	A2	LINC02210-CRHR1	yes
rs62055933	17	43848461	A	G	0.2252	4.33e-08	-0.0535	0.0098	A	G	0.1833	6.35e-14	-0.1264	0.016852	A2	LINC02210-CRHR1	yes
rs62055935	17	43848750	T	C	0.7751	4.57e-08	0.0535	0.0098	C	T	0.1824	1.92e-13	-0.12387	0.016844	A2	LINC02210-CRHR1	yes
rs62055937	17	43848968	T	G	0.2232	3.33e-08	-0.0543	0.0098	T	G	0.1823	1.64e-12	-0.11958	0.016933	A2	LINC02210-CRHR1	yes
rs62055946	17	43851971	A	C	0.2256	4.78e-08	-0.0533	0.0098	A	C	0.1834	8.03e-14	-0.12575	0.016834	A2	LINC02210-CRHR1	yes
rs113871181	17	43852733	A	G	0.2251	3.51e-08	-0.0539	0.0098	A	G	0.183	2.31e-13	-0.12337	0.016833	A2	LINC02210-CRHR1	yes
rs111370985	17	43852742	T	C	0.7748	3.5e-08	0.0539	0.0098	C	T	0.1831	2.24e-13	-0.12343	0.01683	A2	LINC02210-CRHR1	yes
rs62055950	17	43853133	T	C	0.7744	4.87e-08	0.0532	0.0098	C	T	0.1834	6.85e-14	-0.12594	0.016813	A2	LINC02210-CRHR1	yes
rs56043078	17	43853235	T	G	0.7744	4.86e-08	0.0532	0.0098	G	T	0.1834	8.36e-14	-0.12552	0.016815	A2	LINC02210-CRHR1	yes
rs77965652	17	43853457	A	G	0.7744	4.95e-08	0.0532	0.0098	G	A	0.1834	1.02e-13	-0.12509	0.016818	A2	LINC02210-CRHR1	yes
rs62055955	17	43854340	A	G	0.7743	4.83e-08	0.0532	0.0098	G	A	0.1834	1.02e-13	-0.12505	0.016811	A2	LINC02210-CRHR1	yes
rs62057063	17	43856730	T	C	0.2255	4.52e-08	-0.0534	0.0098	T	C	0.1832	1.3e-13	-0.12458	0.016822	A2	LINC02210-CRHR1	yes
rs62057064	17	43857033	T	C	0.2256	4.53e-08	-0.0534	0.0098	T	C	0.1834	7.96e-14	-0.1256	0.016812	A2	LINC02210-CRHR1	yes
rs76830096	17	43857129	A	C	0.7743	4.76e-08	0.0533	0.0098	C	A	0.1834	8.69e-14	-0.12545	0.016818	A2	LINC02210-CRHR1	yes
rs55915917	17	43892784	T	G	0.7745	4.1e-08	0.0537	0.0098	G	T	0.2259	2.65e-13	-0.12368	0.016916	A2	CRHR1;LINC02210-CRHR1	yes
rs17689471	17	43892973	T	C	0.7741	4.11e-08	0.0535	0.0097	C	T	0.1837	9.4e-14	-0.12533	0.016825	A2	CRHR1;LINC02210-CRHR1	yes
rs117646503	17	43893260	T	C	0.7741	4.51e-08	0.0533	0.0097	C	T	0.1836	1.09e-13	-0.12507	0.016833	A2	CRHR1;LINC02210-CRHR1	yes
rs17762769	17	43893403	A	G	0.2259	4.5e-08	-0.0533	0.0097	A	G	0.1836	8.36e-14	-0.1256	0.016827	A2	CRHR1;LINC02210-CRHR1	yes
rs28364025	17	43894102	T	C	0.774	4.45e-08	0.0533	0.0097	C	T	0.1836	8.96e-14	-0.12544	0.016825	A2	CRHR1;LINC02210-CRHR1	yes
rs28364023	17	43894159	T	C	0.2259	4.66e-08	-0.0533	0.0097	T	C	0.1819	4.15e-12	-0.12382	0.017862	A2	CRHR1;LINC02210-CRHR1	yes
rs56357543	17	43894547	T	C	0.2258	4.05e-08	-0.0535	0.0097	T	C	0.1835	9.7e-14	-0.12529	0.016829	A2	CRHR1;LINC02210-CRHR1	yes
rs56099546	17	43894609	A	G	0.7742	3.78e-08	0.0536	0.0097	G	A	0.1835	8.93e-14	-0.12545	0.016826	A2	CRHR1;LINC02210-CRHR1	yes
rs739645	17	43894990	T	G	0.774	4.57e-08	0.0533	0.0097	G	T	0.1836	8.38e-14	-0.1257	0.01684	A2	CRHR1;LINC02210-CRHR1	yes
rs739644	17	43895008	C	G	0.7741	4.67e-08	0.0532	0.0097	G	C	0.1904	2.44e-13	-0.1234	0.016854	A2	CRHR1;LINC02210-CRHR1	yes
rs4564621	17	43895501	C	G	0.2258	4.77e-08	-0.0532	0.0097	C	G	0.1836	1.31e-13	-0.12467	0.016835	A2	CRHR1;LINC02210-CRHR1	yes
rs2316763	17	43895530	T	C	0.2258	4.5e-08	-0.0533	0.0097	T	C	0.1835	8.96e-14	-0.12551	0.016836	A2	CRHR1;LINC02210-CRHR1	yes
rs2316764	17	43895602	T	G	0.7742	3.89e-08	0.0536	0.0097	G	T	0.1835	1.05e-13	-0.12514	0.016831	A2	CRHR1;LINC02210-CRHR1	yes
rs4566211	17	43895696	A	G	0.2259	4.52e-08	-0.0533	0.0097	A	G	0.1836	1.98e-13	-0.12377	0.016839	A2	CRHR1;LINC02210-CRHR1	yes
rs4566212	17	43895751	A	G	0.2259	4.47e-08	-0.0533	0.0097	A	G	0.1836	1.43e-13	-0.1243	0.016811	A2	CRHR1;LINC02210-CRHR1	yes
rs4309444	17	43895797	T	C	0.7742	3.82e-08	0.0536	0.0097	C	T	0.1835	8.74e-14	-0.12537	0.016809	A2	CRHR1;LINC02210-CRHR1	yes
rs62057107	17	43896032	T	C	0.2258	3.68e-08	-0.0537	0.0097	T	C	0.1836	1.84e-13	-0.12394	0.016839	A2	CRHR1;LINC02210-CRHR1	yes
rs12150390	17	43896228	T	C	0.7741	4.54e-08	0.0533	0.0097	C	T	0.1836	7.92e-14	-0.12573	0.016827	A2	CRHR1;LINC02210-CRHR1	yes
rs17689608	17	43896528	C	G	0.7742	4e-08	0.0535	0.0097	G	C	0.1904	8.52e-14	-0.12557	0.016828	A2	CRHR1;LINC02210-CRHR1	yes
rs62057108	17	43896616	T	C	0.7742	3.83e-08	0.0536	0.0097	C	T	0.1836	5.77e-14	-0.12643	0.016828	A2	CRHR1;LINC02210-CRHR1	yes
rs62057109	17	43896637	T	C	0.7742	3.93e-08	0.0536	0.0097	C	T	0.1836	6.66e-14	-0.12611	0.016827	A2	CRHR1;LINC02210-CRHR1	yes
rs78074121	17	43896690	T	C	0.774	3.43e-08	0.0538	0.0097	C	T	0.1836	1.16e-13	-0.12467	0.016798	A2	CRHR1;LINC02210-CRHR1	yes
rs62057110	17	43896734	T	C	0.7742	3.81e-08	0.0536	0.0097	C	T	0.1835	7.18e-14	-0.12592	0.016825	A2	CRHR1;LINC02210-CRHR1	yes
rs62057112	17	43897202	A	T	0.2259	4.53e-08	-0.0533	0.0097	A	T	0.1836	1.63e-13	-0.12414	0.01683	A2	CRHR1;LINC02210-CRHR1	yes
rs78587102	17	43897246	A	G	0.7742	4.69e-08	0.0532	0.0097	G	A	0.1836	8.74e-14	-0.12552	0.016828	A2	CRHR1;LINC02210-CRHR1	yes
rs62057113	17	43897449	A	T	0.7742	3.89e-08	0.0536	0.0097	T	A	0.1904	1.1e-13	-0.12503	0.016832	A2	CRHR1;LINC02210-CRHR1	yes
rs78506181	17	43897480	A	G	0.7741	4.66e-08	0.0533	0.0097	G	A	0.1836	1.11e-13	-0.125	0.01683	A2	CRHR1;LINC02210-CRHR1	yes
rs79600142	17	43897722	T	C	0.7742	4.53e-08	0.0533	0.0097	C	T	0.1835	9.05e-14	-0.12546	0.016831	A2	CRHR1;LINC02210-CRHR1	yes
rs111739681	17	43898459	T	C	0.2258	3.87e-08	-0.0536	0.0097	T	C	0.1835	8.82e-14	-0.1255	0.016829	A2	CRHR1;LINC02210-CRHR1	yes
rs17762882	17	43898887	T	C	0.7742	3.96e-08	0.0535	0.0097	C	T	0.1836	5.27e-14	-0.12662	0.016826	A2	CRHR1;LINC02210-CRHR1	yes
rs17689653	17	43898963	A	T	0.7741	3.86e-08	0.0536	0.0097	T	A	0.1905	9.13e-14	-0.12543	0.016829	A2	CRHR1;LINC02210-CRHR1	yes
rs17762912	17	43899161	A	C	0.7742	3.9e-08	0.0536	0.0097	C	A	0.1835	6.78e-14	-0.12606	0.016826	A2	CRHR1;LINC02210-CRHR1	yes
rs62057115	17	43899417	C	G	0.2258	3.74e-08	-0.0536	0.0097	C	G	0.1835	1.49e-13	-0.12443	0.016843	A2	CRHR1;LINC02210-CRHR1	yes
rs78917479	17	43899611	T	C	0.2258	3.73e-08	-0.0536	0.0097	T	C	0.1835	7.51e-14	-0.12583	0.016826	A2	CRHR1;LINC02210-CRHR1	yes
rs62057116	17	43899655	T	C	0.7742	3.74e-08	0.0536	0.0097	C	T	0.1835	1.07e-13	-0.12509	0.016831	A2	CRHR1;LINC02210-CRHR1	yes
rs62057117	17	43899657	C	G	0.7742	3.85e-08	0.0536	0.0097	G	C	0.1904	1.06e-13	-0.12513	0.016833	A2	CRHR1;LINC02210-CRHR1	yes
rs62057118	17	43899727	A	G	0.7742	4.09e-08	0.0535	0.0098	G	A	0.1834	1.15e-13	-0.12495	0.016835	A2	CRHR1;LINC02210-CRHR1	yes
rs79501144	17	43900697	T	C	0.2259	3.75e-08	-0.0536	0.0097	T	C	0.1836	1.79e-13	-0.12399	0.016839	A2	CRHR1;LINC02210-CRHR1	yes
rs62057123	17	43901238	A	G	0.7741	4.05e-08	0.0535	0.0097	G	A	0.1836	8.42e-14	-0.1256	0.016828	A2	CRHR1;LINC02210-CRHR1	yes
rs62057143	17	43901528	T	C	0.7741	4.42e-08	0.0533	0.0097	C	T	0.1836	6.66e-14	-0.12613	0.016829	A2	CRHR1;LINC02210-CRHR1	yes
rs62057144	17	43901558	A	G	0.7741	4.47e-08	0.0533	0.0097	G	A	0.1836	8.5e-14	-0.12559	0.01683	A2	CRHR1;LINC02210-CRHR1	yes
rs4335809	17	43902216	T	C	0.2258	4.47e-08	-0.0533	0.0097	T	C	0.1836	1.12e-13	-0.12498	0.016831	A2	CRHR1;LINC02210-CRHR1	yes
rs4341787	17	43902505	T	C	0.2259	4.48e-08	-0.0533	0.0097	T	C	0.1836	1.2e-13	-0.12482	0.016831	A2	CRHR1;LINC02210-CRHR1	yes
rs34283254	17	43902861	A	C	0.2259	4.57e-08	-0.0533	0.0097	A	C	0.1836	2.04e-13	-0.12371	0.01684	A2	CRHR1;LINC02210-CRHR1	yes
rs1912151	17	43902944	T	C	0.2259	4.54e-08	-0.0533	0.0097	T	C	0.1819	3.61e-12	-0.12416	0.017861	A2	CRHR1;LINC02210-CRHR1	yes
rs1396862	17	43902997	A	G	0.2259	4.7e-08	-0.0532	0.0097	A	G	0.1836	9e-14	-0.12545	0.016827	A2	CRHR1;LINC02210-CRHR1	yes
rs41280118	17	43903089	T	C	0.2259	4.55e-08	-0.0533	0.0097	T	C	0.1819	5.22e-12	-0.12327	0.017867	A2	CRHR1;LINC02210-CRHR1	yes
rs62057147	17	43903298	A	G	0.2264	3.93e-08	-0.0535	0.0097	A	G	0.1839	1.56e-13	-0.12417	0.016821	A2	CRHR1;LINC02210-CRHR1	yes
rs62057148	17	43903485	C	G	0.2259	4.71e-08	-0.0532	0.0097	C	G	0.1836	7.63e-14	-0.12583	0.01683	A2	CRHR1;LINC02210-CRHR1	yes
rs62057149	17	43903546	A	G	0.7742	4.05e-08	0.0535	0.0097	G	A	0.1836	9.67e-14	-0.12531	0.016831	A2	CRHR1;LINC02210-CRHR1	yes
rs62057150	17	43903548	T	C	0.2259	4.22e-08	-0.0534	0.0097	T	C	0.1836	1.15e-13	-0.12494	0.016833	A2	CRHR1;LINC02210-CRHR1	yes
rs62057152	17	43904110	C	G	0.2258	4.45e-08	-0.0533	0.0097	C	G	0.1836	9.33e-14	-0.12536	0.016826	A2	CRHR1;LINC02210-CRHR1	yes
rs17689824	17	43904397	T	C	0.2259	4.38e-08	-0.0534	0.0097	T	C	0.1819	1.35e-11	-0.12099	0.017891	A2	CRHR1;LINC02210-CRHR1	yes
rs62057153	17	43904528	T	C	0.7741	4.35e-08	0.0534	0.0097	C	T	0.1836	7.7e-14	-0.12578	0.016826	A2	CRHR1;LINC02210-CRHR1	yes
rs62057154	17	43904610	T	C	0.2259	4.17e-08	-0.0535	0.0097	T	C	0.1836	1.06e-13	-0.12514	0.016835	A2	CRHR1;LINC02210-CRHR1	yes
rs62057155	17	43904673	T	C	0.2258	3.95e-08	-0.0536	0.0098	T	C	0.1836	9.23e-14	-0.12539	0.016828	A2	CRHR1;LINC02210-CRHR1	yes
rs62057156	17	43904948	C	G	0.2259	4.22e-08	-0.0534	0.0097	C	G	0.1836	7.85e-14	-0.12574	0.016827	A2	CRHR1;LINC02210-CRHR1	yes
rs78872653	17	43905134	A	G	0.2259	4.22e-08	-0.0534	0.0097	A	G	0.1836	7.69e-14	-0.12575	0.016821	A2	CRHR1;LINC02210-CRHR1	yes
rs62057157	17	43905313	C	G	0.2259	4.34e-08	-0.0534	0.0097	C	G	0.1836	8.39e-14	-0.12563	0.016831	A2	CRHR1;LINC02210-CRHR1	yes
rs17763086	17	43905481	T	G	0.7741	4.19e-08	0.0534	0.0097	G	T	0.1836	1.43e-13	-0.12447	0.016835	A2	CRHR1;LINC02210-CRHR1	yes
rs62057158	17	43907143	A	G	0.2258	3.65e-08	-0.0537	0.0098	A	G	0.1836	1.06e-13	-0.1251	0.01683	A2	CRHR1;LINC02210-CRHR1	yes
rs16940665	17	43907896	T	C	0.774	4.69e-08	0.0532	0.0097	C	T	0.1836	7.71e-14	-0.12582	0.016832	A2	CRHR1;LINC02210-CRHR1	yes
rs16940671	17	43908151	T	C	0.2255	4.32e-08	-0.0535	0.0098	T	C	0.1814	9.11e-12	-0.12199	0.017887	A2	CRHR1;LINC02210-CRHR1	yes
rs16940672	17	43908152	T	C	0.2255	4.26e-08	-0.0535	0.0098	T	C	0.1831	1.4e-13	-0.12461	0.016847	A2	CRHR1;LINC02210-CRHR1	yes
rs55763795	17	43908773	C	G	0.2259	4.51e-08	-0.0533	0.0097	C	G	0.1836	6.37e-14	-0.12618	0.016824	A2	CRHR1;LINC02210-CRHR1	yes
rs62054760	17	43908989	T	C	0.2253	4.29e-08	-0.0535	0.0098	T	C	0.1828	1.26e-13	-0.12486	0.016849	A2	CRHR1;LINC02210-CRHR1	yes
rs62054762	17	43909022	T	G	0.2253	4.4e-08	-0.0535	0.0098	T	G	0.1828	1.39e-13	-0.12463	0.016847	A2	CRHR1;LINC02210-CRHR1	yes
rs17689918	17	43910088	A	G	0.2253	4.46e-08	-0.0534	0.0098	A	G	0.1833	1.22e-13	-0.12495	0.016852	A2	CRHR1;LINC02210-CRHR1	yes
rs17763199	17	43910183	A	G	0.2257	4.52e-08	-0.0534	0.0098	A	G	0.1834	1.03e-13	-0.12523	0.016839	A2	CRHR1;LINC02210-CRHR1	yes
rs62054763	17	43910262	C	G	0.7741	3.92e-08	0.0536	0.0098	G	C	0.1905	6.79e-14	-0.12606	0.016826	A2	CRHR1;LINC02210-CRHR1	yes
rs16940674	17	43910507	T	C	0.2259	3.49e-08	-0.0538	0.0097	T	C	0.1819	7.4e-12	-0.12239	0.017867	A2	CRHR1;LINC02210-CRHR1	yes
rs1876830	17	43911352	T	C	0.2258	4.05e-08	-0.0535	0.0098	T	C	0.1836	7.85e-14	-0.1258	0.016834	A2	CRHR1;LINC02210-CRHR1	yes
rs1876829	17	43911443	T	C	0.774	4.31e-08	0.0534	0.0097	C	T	0.1836	9.16e-14	-0.12546	0.016834	A2	CRHR1;LINC02210-CRHR1	yes
rs1876828	17	43911525	T	C	0.2259	4.36e-08	-0.0534	0.0098	T	C	0.1819	5.79e-12	-0.12303	0.01787	A2	CRHR1;LINC02210-CRHR1	yes
rs1876827	17	43911832	T	C	0.7741	4.02e-08	0.0535	0.0098	C	T	0.1836	5.24e-14	-0.12662	0.016825	A2	CRHR1;LINC02210-CRHR1	yes
rs16940677	17	43911898	T	C	0.2257	3.39e-08	-0.0539	0.0098	T	C	0.1836	4.25e-14	-0.12713	0.016832	A2	CRHR1;LINC02210-CRHR1	yes
rs16940681	17	43912159	C	G	0.2258	4.18e-08	-0.0535	0.0098	C	G	0.1835	5.74e-14	-0.12644	0.016827	A2	LINC02210-CRHR1	yes
rs28364021	17	43912282	T	C	0.2258	4.04e-08	-0.0535	0.0098	T	C	0.1819	8.06e-12	-0.12221	0.017874	A2	CRHR1;LINC02210-CRHR1	yes
rs2316765	17	43912454	T	C	0.7741	4.17e-08	0.0535	0.0098	C	T	0.1836	6.83e-14	-0.12608	0.01683	A2	CRHR1;LINC02210-CRHR1	yes
rs878886	17	43912490	C	G	0.7741	3.94e-08	0.0536	0.0098	G	C	0.1905	6.25e-14	-0.12622	0.016824	A2	CRHR1;LINC02210-CRHR1	yes
rs878887	17	43912582	T	C	0.2259	4.05e-08	-0.0535	0.0098	T	C	0.1836	5.92e-14	-0.12637	0.016828	A2	CRHR1;LINC02210-CRHR1	yes
rs878888	17	43912635	A	G	0.7741	3.99e-08	0.0535	0.0098	G	A	0.1836	6.41e-14	-0.1262	0.016828	A2	CRHR1;LINC02210-CRHR1	yes
rs4525537	17	43912723	T	C	0.7741	3.98e-08	0.0536	0.0098	C	T	0.1836	6.91e-14	-0.12602	0.016826	A2	CRHR1;LINC02210-CRHR1	yes
rs4640231	17	43912786	C	G	0.2258	3.9e-08	-0.0536	0.0098	C	G	0.1836	6.44e-14	-0.12619	0.016827	A2	CRHR1;LINC02210-CRHR1	yes
rs4482334	17	43912830	T	C	0.7742	4e-08	0.0536	0.0098	C	T	0.1836	8.93e-14	-0.12548	0.01683	A2	CRHR1;LINC02210-CRHR1	yes
rs56127111	17	43913315	T	C	0.2259	3.76e-08	-0.0536	0.0098	T	C	0.1836	1.17e-13	-0.12491	0.016834	A2	CRHR1;LINC02210-CRHR1	yes
rs75104593	17	43913557	T	G	0.7752	1.88e-08	0.0551	0.0098	G	T	0.182	9.24e-14	-0.12558	0.016853	A2	CRHR1;LINC02210-CRHR1	yes
rs74998289	17	43913558	T	G	0.7752	1.84e-08	0.0551	0.0098	G	T	0.182	1.2e-13	-0.12502	0.016855	A2	CRHR1;LINC02210-CRHR1	yes
rs10445362	17	43914554	A	C	0.2259	4.18e-08	-0.0535	0.0098	A	C	0.1836	1.12e-13	-0.12503	0.016837	A2	LINC02210-CRHR1;MAPT-AS1	yes
rs10445363	17	43914558	A	G	0.2258	3.96e-08	-0.0536	0.0098	A	G	0.1835	2.41e-13	-0.12334	0.016841	A2	LINC02210-CRHR1;MAPT-AS1	yes
rs62054802	17	43914598	C	G	0.2259	4.12e-08	-0.0535	0.0098	C	G	0.1836	6.06e-14	-0.12632	0.016827	A2	LINC02210-CRHR1;MAPT-AS1	yes
rs62054804	17	43914809	T	C	0.226	3.42e-08	-0.0538	0.0098	T	C	0.1837	5.57e-14	-0.12653	0.01683	A2	LINC02210-CRHR1;MAPT-AS1	yes
rs62054805	17	43915054	A	G	0.7741	4.12e-08	0.0535	0.0098	G	A	0.1836	6.64e-14	-0.12612	0.016828	A2	LINC02210-CRHR1;MAPT-AS1	yes
rs62054806	17	43915312	T	C	0.2258	4.33e-08	-0.0534	0.0098	T	C	0.1836	1.07e-13	-0.12511	0.016834	A2	LINC02210-CRHR1;MAPT-AS1	yes
rs10445364	17	43916356	A	G	0.2259	4.17e-08	-0.0535	0.0098	A	G	0.1836	1.35e-13	-0.12464	0.016841	A2	LINC02210-CRHR1;MAPT-AS1	yes
rs10445333	17	43916509	A	G	0.7742	4.16e-08	0.0535	0.0098	G	A	0.1836	5.46e-14	-0.12654	0.016827	A2	LINC02210-CRHR1;MAPT-AS1	yes
rs17690176	17	43916773	A	C	0.7741	4.68e-08	0.0533	0.0098	C	A	0.1836	8.34e-14	-0.12548	0.01681	A2	LINC02210-CRHR1;MAPT-AS1	yes
rs78328427	17	43916932	A	G	0.2258	3.73e-08	-0.0537	0.0098	A	G	0.1836	1.42e-13	-0.12451	0.016838	A2	LINC02210-CRHR1;MAPT-AS1	yes
rs17763533	17	43918190	T	C	0.7741	4.24e-08	0.0535	0.0098	C	T	0.1819	5.07e-12	-0.12334	0.017866	A2	LINC02210-CRHR1;MAPT-AS1	yes
rs62054809	17	43918239	T	C	0.2258	4.56e-08	-0.0533	0.0098	T	C	0.1835	2.06e-13	-0.12376	0.01685	A2	LINC02210-CRHR1;MAPT-AS1	yes
rs112583797	17	43918418	A	G	0.7741	4.18e-08	0.0535	0.0098	G	A	0.1836	6.83e-14	-0.12607	0.016829	A2	LINC02210-CRHR1;MAPT-AS1	yes
rs74922289	17	43918524	A	G	0.7742	4.14e-08	0.0535	0.0098	G	A	0.1836	6.38e-14	-0.12621	0.016827	A2	LINC02210-CRHR1;MAPT-AS1	yes
rs56150806	17	43919301	T	C	0.7742	4.17e-08	0.0535	0.0098	C	T	0.1836	8.31e-14	-0.12562	0.016827	A2	LINC02210-CRHR1;MAPT-AS1	yes
rs17690314	17	43919884	T	G	0.7741	4.41e-08	0.0534	0.0098	G	T	0.1819	7.14e-12	-0.12247	0.017867	A2	MAPT-AS1	yes
rs56354807	17	43920378	T	C	0.2258	4.28e-08	-0.0534	0.0098	T	C	0.1836	1.89e-13	-0.12393	0.016846	A2	MAPT-AS1	yes
rs55718212	17	43920411	T	C	0.7742	4.74e-08	0.0533	0.0098	C	T	0.1836	8.33e-14	-0.12567	0.016834	A2	MAPT-AS1	yes
rs17690326	17	43920974	T	C	0.7741	4.2e-08	0.0535	0.0098	C	T	0.1836	7.93e-14	-0.12574	0.01683	A2	MAPT-AS1	yes
rs17763596	17	43921210	T	G	0.2258	3.91e-08	-0.0536	0.0098	T	G	0.1836	7.85e-14	-0.12575	0.016827	A2	MAPT-AS1	yes
rs62054814	17	43921572	A	T	0.2259	4.08e-08	-0.0535	0.0098	A	T	0.1836	8.5e-14	-0.12557	0.016828	A2	MAPT-AS1	yes
rs17763634	17	43921754	T	C	0.7742	3.51e-08	0.0538	0.0098	C	T	0.1819	3.93e-12	-0.12397	0.017864	A2	MAPT-AS1	yes
rs62054815	17	43923266	A	G	0.2259	3.6e-08	-0.0537	0.0098	A	G	0.1836	1e-13	-0.12523	0.01683	A2	SPPL2C	yes
rs12185233	17	43923654	C	G	0.2262	2.48e-08	-0.0544	0.0098	C	G	0.1839	4.4e-14	-0.1271	0.016837	A2	SPPL2C	yes
rs12185268	17	43923683	A	G	0.774	3.85e-08	0.0536	0.0097	G	A	0.1836	5.88e-14	-0.12645	0.016837	A2	SPPL2C	yes
rs12185235	17	43923703	T	C	0.2257	3.08e-08	-0.054	0.0098	T	C	0.1835	7.53e-14	-0.12592	0.016839	A2	SPPL2C	yes
rs11079725	17	43923934	T	C	0.7741	3.9e-08	0.0536	0.0098	C	T	0.1836	1.18e-13	-0.1249	0.016834	A2	SPPL2C	yes
rs12373123	17	43924073	T	C	0.774	3.89e-08	0.0536	0.0098	C	T	0.1836	4.88e-14	-0.1268	0.016828	A2	SPPL2C	yes
rs12373139	17	43924130	A	G	0.226	3.82e-08	-0.0536	0.0097	A	G	0.1836	1.01e-13	-0.12524	0.016835	A2	SPPL2C	yes
rs12373142	17	43924200	C	G	0.7746	3.02e-08	0.0541	0.0098	G	C	0.1881	8.06e-12	-0.12233	0.017891	A2	SPPL2C	yes
rs12373140	17	43924231	A	G	0.2253	2.89e-08	-0.0542	0.0098	A	G	0.1828	1.11e-13	-0.12513	0.016848	A2	SPPL2C	yes
rs17690661	17	43924521	A	G	0.2259	3.93e-08	-0.0536	0.0098	A	G	0.1836	1.09e-13	-0.12504	0.016831	A2	MAPT-AS1	yes
rs55943825	17	43924776	T	C	0.2258	4.01e-08	-0.0536	0.0098	T	C	0.1836	9.34e-14	-0.12539	0.016831	A2	MAPT-AS1	yes
rs17690679	17	43924803	A	G	0.7742	4.02e-08	0.0536	0.0098	G	A	0.1819	5.14e-12	-0.12332	0.017869	A2	MAPT-AS1	yes
rs62054820	17	43926755	A	G	0.7738	4.75e-08	0.0532	0.0097	G	A	0.1839	7.88e-14	-0.1256	0.016808	A2	MAPT-AS1	yes
rs56113217	17	43926948	A	G	0.774	4.7e-08	0.0532	0.0097	G	A	0.1838	5.33e-14	-0.12644	0.016806	A2	MAPT-AS1	yes
rs62054824	17	43929992	T	C	0.2258	3.97e-08	-0.0536	0.0098	T	C	0.1836	1.44e-13	-0.12448	0.016839	A2	MAPT-AS1	yes
rs62054825	17	43930033	A	G	0.2259	3.89e-08	-0.0536	0.0098	A	G	0.1836	1.01e-13	-0.12521	0.016831	A2	MAPT-AS1	yes
rs79589869	17	43930238	A	C	0.2258	3.66e-08	-0.0538	0.0098	A	C	0.1835	1.36e-13	-0.1246	0.016837	A2	MAPT-AS1	yes
rs2316769	17	43930798	A	G	0.7741	3.76e-08	0.0537	0.0098	G	A	0.1836	9.4e-14	-0.12535	0.016827	A2	MAPT-AS1	yes
rs2873268	17	43930955	A	G	0.2258	3.86e-08	-0.0537	0.0098	A	G	0.1835	1.42e-13	-0.1245	0.016838	A2	MAPT-AS1	yes
rs4340365	17	43930980	T	C	0.2258	3.57e-08	-0.0538	0.0098	T	C	0.1835	1.45e-13	-0.12447	0.016839	A2	MAPT-AS1	yes
rs2873269	17	43931122	T	C	0.2259	3.78e-08	-0.0537	0.0098	T	C	0.1819	8.3e-12	-0.12213	0.017873	A2	MAPT-AS1	yes
rs56026128	17	43931244	C	G	0.2258	4.15e-08	-0.0535	0.0098	C	G	0.1835	1.15e-13	-0.12492	0.01683	A2	MAPT-AS1	yes
rs56329743	17	43931245	A	G	0.2258	3.94e-08	-0.0536	0.0098	A	G	0.1836	1.11e-13	-0.12498	0.016828	A2	MAPT-AS1	yes
rs56288604	17	43931380	A	G	0.7741	3.62e-08	0.0538	0.0098	G	A	0.1837	9.11e-14	-0.12541	0.016827	A2	MAPT-AS1	yes
rs17690987	17	43931626	T	C	0.7741	3.36e-08	0.0539	0.0098	C	T	0.182	5.25e-12	-0.12323	0.017863	A2	MAPT-AS1	yes
rs56146262	17	43931907	A	C	0.2258	3.64e-08	-0.0538	0.0098	A	C	0.1836	1.91e-13	-0.12395	0.016852	A2	MAPT-AS1	yes
rs55942528	17	43932028	A	G	0.7739	3.48e-08	0.0538	0.0098	G	A	0.1837	1.12e-13	-0.125	0.016832	A2	MAPT-AS1	yes
rs56254732	17	43932049	T	C	0.2259	2.89e-08	-0.0542	0.0098	T	C	0.1837	1.09e-13	-0.12513	0.016843	A2	MAPT-AS1	yes
rs113856644	17	43932277	A	G	0.2259	4.06e-08	-0.0536	0.0098	A	G	0.1836	1.5e-13	-0.12442	0.016842	A2	MAPT-AS1	yes
rs4627402	17	43932741	T	C	0.2214	2.64e-08	-0.055	0.0099	T	C	0.1795	3.79e-13	-0.12356	0.017013	A2	MAPT-AS1	yes
rs62054833	17	43933673	T	C	0.774	3.68e-08	0.0537	0.0098	C	T	0.1836	1.39e-13	-0.12447	0.016825	A2	MAPT-AS1	yes
rs76563578	17	43933879	C	G	0.774	4.28e-08	0.0535	0.0098	G	C	0.1906	1.27e-13	-0.12465	0.016825	A2	MAPT-AS1	yes
rs62054834	17	43934314	T	C	0.7739	3.77e-08	0.0537	0.0098	C	T	0.1837	1.48e-13	-0.12432	0.016826	A2	MAPT-AS1	yes
rs62054835	17	43934672	A	C	0.774	3.54e-08	0.0538	0.0098	C	A	0.1837	1.35e-13	-0.12456	0.01683	A2	MAPT-AS1	yes
rs10445369	17	43934776	A	G	0.774	3.63e-08	0.0538	0.0098	G	A	0.1837	1.61e-13	-0.12421	0.016837	A2	MAPT-AS1	yes
rs10445334	17	43934826	T	G	0.774	3.56e-08	0.0538	0.0098	G	T	0.1837	1.59e-13	-0.12418	0.016828	A2	MAPT-AS1	yes
rs10445336	17	43934948	A	G	0.774	3.57e-08	0.0538	0.0098	G	A	0.1837	1.27e-13	-0.1247	0.016831	A2	MAPT-AS1	yes
rs10445370	17	43935118	A	G	0.226	3.73e-08	-0.0537	0.0098	A	G	0.1836	1.48e-13	-0.12438	0.016834	A2	MAPT-AS1	yes
rs55996632	17	43935888	T	C	0.226	3.41e-08	-0.0539	0.0098	T	C	0.1837	1.25e-13	-0.12476	0.016834	A2	MAPT-AS1	yes
rs55886302	17	43936011	A	G	0.774	3.56e-08	0.0538	0.0098	G	A	0.1837	1.3e-13	-0.1246	0.016825	A2	MAPT-AS1	yes
rs56136075	17	43936298	A	C	0.226	3.56e-08	-0.0538	0.0098	A	C	0.1837	1.71e-13	-0.12399	0.016824	A2	MAPT-AS1	yes
rs62054841	17	43937104	A	G	0.226	3.66e-08	-0.0537	0.0098	A	G	0.1837	1.71e-13	-0.12399	0.016825	A2	MAPT-AS1	yes
rs62054842	17	43937162	T	C	0.226	3.93e-08	-0.0536	0.0098	T	C	0.1837	1.55e-13	-0.12421	0.016824	A2	MAPT-AS1	yes
rs62054843	17	43937184	T	C	0.7739	3.48e-08	0.0538	0.0098	C	T	0.1837	2.25e-13	-0.12339	0.016828	A2	MAPT-AS1	yes
rs62054844	17	43937333	T	G	0.774	3.76e-08	0.0537	0.0098	G	T	0.1837	1.57e-13	-0.12418	0.016824	A2	MAPT-AS1	yes
rs76627340	17	43937460	A	G	0.226	3.86e-08	-0.0536	0.0098	A	G	0.1837	1.32e-13	-0.12455	0.016822	A2	MAPT-AS1	yes
rs75945623	17	43937505	T	C	0.2261	3.42e-08	-0.0539	0.0098	T	C	0.1837	1.57e-13	-0.12422	0.016829	A2	MAPT-AS1	yes
rs79889833	17	43937633	A	G	0.774	3.79e-08	0.0537	0.0098	G	A	0.1837	1.67e-13	-0.12409	0.01683	A2	MAPT-AS1	yes
rs77489223	17	43937736	T	C	0.226	3.81e-08	-0.0537	0.0098	T	C	0.1837	1.48e-13	-0.12431	0.016824	A2	MAPT-AS1	yes
rs55888391	17	43938107	A	G	0.774	3.69e-08	0.0537	0.0098	G	A	0.1837	1.69e-13	-0.12406	0.016831	A2	MAPT-AS1	yes
rs76329216	17	43938499	A	G	0.226	3.61e-08	-0.0538	0.0098	A	G	0.1837	1.65e-13	-0.12407	0.016824	A2	MAPT-AS1	yes
rs62054846	17	43938634	A	G	0.774	3.9e-08	0.0536	0.0098	G	A	0.1837	1.38e-13	-0.12445	0.016823	A2	MAPT-AS1	yes
rs55646970	17	43938796	A	G	0.774	3.77e-08	0.0537	0.0098	G	A	0.1837	1.36e-13	-0.12449	0.016823	A2	MAPT-AS1	yes
rs56347602	17	43939255	T	C	0.774	3.63e-08	0.0538	0.0098	C	T	0.1837	1.57e-13	-0.12422	0.01683	A2	MAPT-AS1	yes
rs56249080	17	43939432	T	G	0.226	3.61e-08	-0.0538	0.0098	T	G	0.1837	2.26e-13	-0.12341	0.01683	A2	MAPT-AS1	yes
rs56227067	17	43939609	A	T	0.7741	3.87e-08	0.0537	0.0098	T	A	0.1905	1.27e-13	-0.12467	0.016826	A2	MAPT-AS1	yes
rs55719714	17	43939638	A	G	0.226	3.67e-08	-0.0538	0.0098	A	G	0.1836	1.4e-13	-0.12445	0.016825	A2	MAPT-AS1	yes
rs56299858	17	43939659	A	G	0.226	3.85e-08	-0.0537	0.0098	A	G	0.1836	1.29e-13	-0.12463	0.016826	A2	MAPT-AS1	yes
rs62054857	17	43939936	A	G	0.226	3.66e-08	-0.0538	0.0098	A	G	0.1837	1.94e-13	-0.12374	0.016828	A2	MAPT-AS1	yes
rs62054858	17	43940188	T	C	0.774	3.94e-08	0.0536	0.0098	C	T	0.1837	1.44e-13	-0.12437	0.016824	A2	MAPT-AS1	yes
rs79406732	17	43940497	T	C	0.2258	3.18e-08	-0.054	0.0098	T	C	0.1835	1.61e-13	-0.12419	0.016833	A2	MAPT-AS1	yes
rs62054859	17	43940685	A	G	0.226	3.94e-08	-0.0536	0.0098	A	G	0.1837	1.7e-13	-0.12401	0.016825	A2	MAPT-AS1	yes
rs62055460	17	43940825	C	G	0.226	3.65e-08	-0.0538	0.0098	C	G	0.1837	1.45e-13	-0.12435	0.016822	A2	MAPT-AS1	yes
rs62055461	17	43941350	T	C	0.226	3.54e-08	-0.0538	0.0098	T	C	0.1837	1.74e-13	-0.12403	0.016834	A2	MAPT-AS1	yes
rs62055462	17	43941476	A	C	0.774	3.55e-08	0.0538	0.0098	C	A	0.1837	1.36e-13	-0.12457	0.016835	A2	MAPT-AS1	yes
rs62055463	17	43941491	A	G	0.774	3.52e-08	0.0538	0.0098	G	A	0.1837	1.7e-13	-0.12408	0.016834	A2	MAPT-AS1	yes
rs77652965	17	43941608	C	G	0.774	3.59e-08	0.0538	0.0098	G	C	0.1906	1.66e-13	-0.12409	0.016828	A2	MAPT-AS1	yes
rs75690239	17	43941710	T	C	0.226	3.36e-08	-0.0539	0.0098	T	C	0.1837	1.78e-13	-0.12396	0.016832	A2	MAPT-AS1	yes
rs62055464	17	43941858	T	G	0.774	3.68e-08	0.0537	0.0098	G	T	0.1837	1.42e-13	-0.12441	0.016826	A2	MAPT-AS1	yes
rs62055465	17	43942046	A	T	0.226	3.7e-08	-0.0537	0.0098	A	T	0.1837	2.21e-13	-0.12344	0.016828	A2	MAPT-AS1	yes
rs62055466	17	43942656	A	G	0.226	3.66e-08	-0.0538	0.0098	A	G	0.1837	2.03e-13	-0.12366	0.016831	A2	MAPT-AS1	yes
rs62055467	17	43942820	T	C	0.774	3.72e-08	0.0537	0.0098	C	T	0.1837	1.31e-13	-0.12461	0.016829	A2	MAPT-AS1	yes
rs62055468	17	43943000	A	C	0.774	3.85e-08	0.0537	0.0098	C	A	0.1837	1.62e-13	-0.12411	0.016823	A2	MAPT-AS1	yes
rs62055469	17	43943655	A	C	0.774	4.02e-08	0.0536	0.0098	C	A	0.1837	1.77e-13	-0.12393	0.016826	A2	MAPT-AS1	yes
rs62055470	17	43943657	A	G	0.774	4.04e-08	0.0536	0.0098	G	A	0.1837	2.02e-13	-0.12367	0.016832	A2	MAPT-AS1	yes
rs62055471	17	43943755	T	C	0.774	3.86e-08	0.0537	0.0098	C	T	0.1837	1.23e-13	-0.12469	0.016821	A2	MAPT-AS1	yes
rs56036719	17	43943974	T	C	0.226	3.64e-08	-0.0538	0.0098	T	C	0.1837	1.95e-13	-0.12372	0.016828	A2	MAPT-AS1	yes
rs55781174	17	43944158	T	C	0.226	3.62e-08	-0.0538	0.0098	T	C	0.1837	1.49e-13	-0.12429	0.016823	A2	MAPT-AS1	yes
rs12150223	17	43944204	T	C	0.774	3.47e-08	0.0539	0.0098	C	T	0.1837	1.6e-13	-0.12417	0.016827	A2	MAPT-AS1	yes
rs12150516	17	43944519	T	C	0.226	3.64e-08	-0.0538	0.0098	T	C	0.1837	2.03e-13	-0.12365	0.01683	A2	MAPT-AS1	yes
rs62055475	17	43945106	T	C	0.774	3.57e-08	0.0538	0.0098	C	T	0.1837	1.63e-13	-0.12412	0.016828	A2	MAPT-AS1	yes
rs62055476	17	43945495	A	G	0.774	3.3e-08	0.0539	0.0098	G	A	0.1837	1.45e-13	-0.12436	0.016825	A2	MAPT-AS1	yes
rs62055477	17	43945687	A	C	0.226	3.39e-08	-0.0539	0.0098	A	C	0.1802	3.5e-13	-0.12253	0.016846	A2	MAPT-AS1	yes
rs78637438	17	43945855	A	G	0.2259	3.75e-08	-0.0537	0.0098	A	G	0.1837	1.78e-13	-0.12392	0.016827	A2	MAPT-AS1	yes
rs2316771	17	43945931	T	C	0.7741	3.63e-08	0.0538	0.0098	C	T	0.1837	1.52e-13	-0.12429	0.01683	A2	MAPT-AS1	yes
rs62055478	17	43945938	T	C	0.2259	3.62e-08	-0.0538	0.0098	T	C	0.1837	2.02e-13	-0.12368	0.016834	A2	MAPT-AS1	yes
rs1078830	17	43946112	T	C	0.774	3.66e-08	0.0538	0.0098	C	T	0.182	1.44e-11	-0.12076	0.01788	A2	MAPT-AS1	yes
rs753236	17	43946318	T	C	0.772	2.01e-08	0.0549	0.0098	C	T	0.1845	3.48e-13	-0.12247	0.016836	A2	MAPT-AS1	yes
rs2316773	17	43946536	T	C	0.226	2.49e-08	-0.0544	0.0098	T	C	0.1838	3.94e-13	-0.12215	0.016831	A2	MAPT-AS1	yes
rs2316774	17	43946642	T	C	0.7739	3.11e-08	0.0541	0.0098	C	T	0.1837	1.76e-13	-0.12395	0.016829	A2	MAPT-AS1	yes
rs739643	17	43946707	T	C	0.7738	3.38e-08	0.0539	0.0098	C	T	0.1837	2.57e-13	-0.1232	0.016841	A2	MAPT-AS1	yes
rs739642	17	43946838	A	C	0.226	3.03e-08	-0.0541	0.0098	A	C	0.1836	4.35e-13	-0.122	0.016841	A2	MAPT-AS1	yes
rs757055	17	43946875	T	C	0.2259	3.22e-08	-0.054	0.0098	T	C	0.1836	4.97e-13	-0.12172	0.016844	A2	MAPT-AS1	yes
rs56398500	17	43947488	A	G	0.7741	2.96e-08	0.0541	0.0098	G	A	0.1837	1.55e-13	-0.12423	0.016826	A2	MAPT-AS1	yes
rs56289364	17	43947928	A	G	0.774	3.17e-08	0.054	0.0098	G	A	0.1837	1.43e-13	-0.12439	0.016824	A2	MAPT-AS1	yes
rs62055483	17	43948040	T	C	0.226	2.99e-08	-0.0541	0.0098	T	C	0.1837	2.55e-13	-0.12314	0.016831	A2	MAPT-AS1	yes
rs78238042	17	43948159	A	G	0.226	3.03e-08	-0.0541	0.0098	A	G	0.1837	1.99e-13	-0.12366	0.016826	A2	MAPT-AS1	yes
rs55673340	17	43948733	T	C	0.2259	3.36e-08	-0.0539	0.0098	T	C	0.1837	2.66e-13	-0.12309	0.016837	A2	MAPT-AS1	yes
rs77092481	17	43949008	T	C	0.2258	3.53e-08	-0.0539	0.0098	T	C	0.1836	2.42e-13	-0.12338	0.016847	A2	MAPT-AS1	yes
rs62055486	17	43949092	T	G	0.7741	3.16e-08	0.054	0.0098	G	T	0.1837	1.45e-13	-0.12424	0.016808	A2	MAPT-AS1	yes
rs34739559	17	43949342	A	G	0.2253	2.49e-08	-0.0548	0.0098	A	G	0.1826	1.76e-13	-0.1244	0.016889	A2	MAPT-AS1	yes
rs2106784	17	43949892	T	C	0.226	3.1e-08	-0.0541	0.0098	T	C	0.1837	9.39e-14	-0.12532	0.016824	A2	MAPT-AS1	yes
rs2158072	17	43950195	T	C	0.7741	3.03e-08	0.0541	0.0098	C	T	0.1837	1.89e-13	-0.12377	0.016825	A2	MAPT-AS1	yes
rs62055490	17	43950533	A	G	0.7741	2.81e-08	0.0542	0.0098	G	A	0.1837	2.98e-13	-0.12278	0.01683	A2	MAPT-AS1	yes
rs10491140	17	43950976	T	G	0.2265	2.35e-08	-0.0545	0.0098	T	G	0.1783	2.51e-11	-0.11945	0.017902	A2	MAPT-AS1	yes
rs62055491	17	43951120	T	C	0.774	2.42e-08	0.0545	0.0098	C	T	0.1837	1.63e-13	-0.12407	0.016821	A2	MAPT-AS1	yes
rs34416056	17	43951220	T	G	0.774	2.57e-08	0.0544	0.0098	G	T	0.1837	1.79e-13	-0.12388	0.016823	A2	MAPT-AS1	yes
rs62055492	17	43951345	A	C	0.226	2.78e-08	-0.0542	0.0098	A	C	0.1837	1.48e-13	-0.12432	0.016824	A2	MAPT-AS1	yes
rs2055794	17	43951717	A	G	0.2259	2.18e-08	-0.0547	0.0098	A	G	0.1836	1.57e-13	-0.12416	0.016822	A2	MAPT-AS1	yes
rs2055795	17	43951995	T	C	0.2259	2.2e-08	-0.0546	0.0098	T	C	0.1836	2.15e-13	-0.12353	0.016832	A2	MAPT-AS1	yes
rs2055796	17	43952191	A	T	0.7741	2.21e-08	0.0546	0.0098	T	A	0.1905	1.71e-13	-0.12398	0.016823	A2	MAPT-AS1	yes
rs62055496	17	43953307	T	C	0.2259	2.21e-08	-0.0546	0.0098	T	C	0.1836	1.72e-13	-0.12401	0.016829	A2	MAPT-AS1	yes
rs62055497	17	43953529	A	G	0.7741	2.36e-08	0.0545	0.0098	G	A	0.1836	1.62e-13	-0.12409	0.016821	A2	MAPT-AS1	yes
rs2188888	17	43953695	T	C	0.7746	2.74e-08	0.0544	0.0098	C	T	0.1829	4.62e-13	-0.122	0.016859	A2	MAPT-AS1	yes
rs2214258	17	43953719	C	G	0.2254	2.55e-08	-0.0545	0.0098	C	G	0.1829	2.97e-13	-0.12291	0.016847	A2	MAPT-AS1	yes
rs62055498	17	43953814	A	G	0.226	2.58e-08	-0.0544	0.0098	A	G	0.1837	1.6e-13	-0.12412	0.016821	A2	MAPT-AS1	yes
rs62055499	17	43953991	C	G	0.774	2.6e-08	0.0544	0.0098	G	C	0.1906	1.79e-13	-0.12386	0.016821	A2	MAPT-AS1	yes
rs62055500	17	43954134	A	G	0.226	2.62e-08	-0.0543	0.0098	A	G	0.1837	1.83e-13	-0.12387	0.016829	A2	MAPT-AS1	yes
rs62055501	17	43954227	A	G	0.2259	2.66e-08	-0.0543	0.0098	A	G	0.1837	2.44e-13	-0.1232	0.016826	A2	MAPT-AS1	yes
rs62055502	17	43954284	A	G	0.2259	2.7e-08	-0.0543	0.0098	A	G	0.1836	1.84e-13	-0.12381	0.016823	A2	MAPT-AS1	yes
rs916793	17	43954686	A	G	0.226	2.28e-08	-0.0546	0.0098	A	G	0.1837	2.32e-13	-0.12331	0.016825	A2	MAPT-AS1	yes
rs4441322	17	43955030	A	G	0.7741	2.53e-08	0.0544	0.0098	G	A	0.1837	1.73e-13	-0.12396	0.016823	A2	MAPT-AS1	yes
rs113414067	17	43955093	T	C	0.774	2.61e-08	0.0544	0.0098	C	T	0.1837	1.47e-13	-0.12431	0.016821	A2	MAPT-AS1	yes
rs55905252	17	43955365	A	C	0.226	2.6e-08	-0.0544	0.0098	A	C	0.1837	1.72e-13	-0.12397	0.016823	A2	MAPT-AS1	yes
rs62055517	17	43956425	T	C	0.2259	2.65e-08	-0.0543	0.0098	T	C	0.1836	2.21e-13	-0.12354	0.016843	A2	MAPT-AS1	yes
rs62055518	17	43956505	A	C	0.7741	2.88e-08	0.0542	0.0098	C	A	0.1836	1.45e-13	-0.12441	0.01683	A2	MAPT-AS1	yes
rs56364632	17	43956642	T	C	0.7741	2.78e-08	0.0543	0.0098	C	T	0.1836	2.02e-13	-0.12361	0.016823	A2	MAPT-AS1	yes
rs55768605	17	43956734	A	C	0.2261	2.62e-08	-0.0544	0.0098	A	C	0.1837	1.77e-13	-0.12388	0.01682	A2	MAPT-AS1	yes
rs55653657	17	43956778	A	G	0.7741	2.9e-08	0.0542	0.0098	G	A	0.1819	1.41e-11	-0.12066	0.017858	A2	MAPT-AS1	yes
rs55894109	17	43957221	T	C	0.226	2.58e-08	-0.0544	0.0098	T	C	0.1837	2.09e-13	-0.12356	0.016827	A2	MAPT-AS1	yes
rs56249780	17	43957328	T	C	0.226	2.51e-08	-0.0544	0.0098	T	C	0.1837	2.32e-13	-0.12336	0.016832	A2	MAPT-AS1	yes
rs55721252	17	43958099	T	C	0.7741	2.7e-08	0.0543	0.0098	C	T	0.1836	2.35e-13	-0.12331	0.01683	A2	MAPT-AS1	yes
rs55876817	17	43958139	A	C	0.7741	2.9e-08	0.0542	0.0098	C	A	0.1835	1.98e-13	-0.1237	0.016829	A2	MAPT-AS1	yes
rs55944735	17	43958172	A	G	0.774	2.83e-08	0.0542	0.0098	G	A	0.1836	2.04e-13	-0.12362	0.016827	A2	MAPT-AS1	yes
rs2006305	17	43959752	A	T	0.7741	2.68e-08	0.0543	0.0098	T	A	0.1906	2.21e-13	-0.12348	0.016833	A2	MAPT-AS1	yes
rs62055529	17	43960020	A	G	0.7741	2.73e-08	0.0543	0.0098	G	A	0.1837	3.2e-13	-0.12268	0.016838	A2	MAPT-AS1	yes
rs79580365	17	43960172	T	C	0.226	2.73e-08	-0.0543	0.0098	T	C	0.1837	2.14e-13	-0.12352	0.016829	A2	MAPT-AS1	yes
rs55937610	17	43960283	A	G	0.7741	2.67e-08	0.0543	0.0098	G	A	0.1837	2.04e-13	-0.12361	0.016826	A2	MAPT-AS1	yes
rs56194412	17	43960600	T	C	0.7741	2.78e-08	0.0543	0.0098	C	T	0.1837	1.76e-13	-0.12393	0.016824	A2	MAPT-AS1	yes
rs56338487	17	43960812	A	T	0.7741	2.73e-08	0.0543	0.0098	T	A	0.1906	2.02e-13	-0.12361	0.016823	A2	MAPT-AS1	yes
rs56180212	17	43960911	A	G	0.7734	4.8e-08	0.0533	0.0098	G	A	0.1839	1.47e-13	-0.12415	0.016801	A2	MAPT-AS1	yes
rs56301449	17	43960918	T	C	0.7741	2.64e-08	0.0544	0.0098	C	T	0.1836	2.77e-13	-0.12294	0.01683	A2	MAPT-AS1	yes
rs62055538	17	43960997	T	C	0.774	2.97e-08	0.0541	0.0098	C	T	0.1837	1.61e-13	-0.12411	0.016823	A2	MAPT-AS1	yes
rs62055539	17	43961044	A	G	0.7741	2.67e-08	0.0543	0.0098	G	A	0.1837	1.59e-13	-0.12414	0.016823	A2	MAPT-AS1	yes
rs62055540	17	43961142	T	C	0.7741	2.69e-08	0.0543	0.0098	C	T	0.1837	1.63e-13	-0.12407	0.016821	A2	MAPT-AS1	yes
rs17770108	17	43961292	T	G	0.2259	2.69e-08	-0.0543	0.0098	T	G	0.182	1.23e-11	-0.12105	0.017862	A2	MAPT-AS1	yes
rs62055541	17	43962017	C	G	0.2259	2.71e-08	-0.0543	0.0098	C	G	0.1837	2.24e-13	-0.12339	0.016825	A2	MAPT-AS1	yes
rs77426526	17	43962982	A	G	0.226	2.98e-08	-0.0541	0.0098	A	G	0.1837	1.41e-13	-0.12446	0.01683	A2	MAPT-AS1	yes
rs77129180	17	43963046	A	G	0.2259	2.66e-08	-0.0543	0.0098	A	G	0.1837	1.49e-13	-0.12429	0.016823	A2	MAPT-AS1	yes
rs74863825	17	43963120	T	C	0.2259	2.28e-08	-0.0546	0.0098	T	C	0.1836	1.3e-13	-0.12463	0.016826	A2	MAPT-AS1	yes
rs80254317	17	43963282	C	G	0.7741	2.84e-08	0.0542	0.0098	G	C	0.2374	2.76e-13	-0.1234	0.016892	A2	MAPT-AS1	yes
rs62055542	17	43963844	T	C	0.2259	2.58e-08	-0.0544	0.0098	T	C	0.1837	1.42e-13	-0.1244	0.016823	A2	MAPT-AS1	yes
rs17770120	17	43963943	A	C	0.2259	2.7e-08	-0.0543	0.0098	A	C	0.1837	1.34e-13	-0.12452	0.016823	A2	MAPT-AS1	yes
rs17770150	17	43964163	A	G	0.2259	2.71e-08	-0.0543	0.0098	A	G	0.1837	1.71e-13	-0.124	0.016826	A2	MAPT-AS1	yes
rs17770186	17	43964191	A	C	0.2254	2.83e-08	-0.0543	0.0098	A	C	0.1835	2.17e-13	-0.12361	0.016846	A2	MAPT-AS1	yes
rs17691449	17	43964283	C	G	0.2259	2.7e-08	-0.0543	0.0098	C	G	0.1837	1.7e-13	-0.124	0.016824	A2	MAPT-AS1	yes
rs62055544	17	43964539	A	G	0.7732	4.16e-08	0.0536	0.0098	G	A	0.1841	2.49e-13	-0.12291	0.016793	A2	MAPT-AS1	yes
rs62055545	17	43964561	T	C	0.2258	2.49e-08	-0.0546	0.0098	T	C	0.1828	1.33e-12	-0.11942	0.016842	A2	MAPT-AS1	yes
rs62055546	17	43964567	A	C	0.7751	2.7e-08	0.0545	0.0098	C	A	0.1823	3.57e-13	-0.1226	0.016862	A2	MAPT-AS1	yes
rs62055547	17	43964755	T	C	0.2259	2.68e-08	-0.0543	0.0098	T	C	0.1837	1.65e-13	-0.12411	0.01683	A2	MAPT-AS1	yes
rs62055548	17	43964899	A	G	0.7741	2.67e-08	0.0543	0.0098	G	A	0.1837	1.87e-13	-0.12381	0.016826	A2	MAPT-AS1	yes
rs113327263	17	43965063	T	C	0.7741	2.77e-08	0.0543	0.0098	C	T	0.1837	1.58e-13	-0.12416	0.016822	A2	MAPT-AS1	yes
rs62055549	17	43965595	C	G	0.2259	2.7e-08	-0.0543	0.0098	C	G	0.1837	1.59e-13	-0.12418	0.016828	A2	MAPT-AS1	yes
rs62055550	17	43965680	A	G	0.226	3.32e-08	-0.054	0.0098	A	G	0.1839	2.3e-13	-0.12338	0.016833	A2	MAPT-AS1	yes
rs62055551	17	43965687	C	G	0.774	3.37e-08	0.0539	0.0098	G	C	0.1908	2.18e-13	-0.12351	0.016832	A2	MAPT-AS1	yes
rs62055552	17	43965955	A	G	0.7741	2.7e-08	0.0543	0.0098	G	A	0.1837	1.39e-13	-0.12443	0.016822	A2	MAPT-AS1	yes
rs62055553	17	43966178	A	C	0.2259	2.73e-08	-0.0543	0.0098	A	C	0.1837	1.34e-13	-0.12454	0.016826	A2	MAPT-AS1	yes
rs62055554	17	43966260	A	G	0.7741	2.7e-08	0.0543	0.0098	G	A	0.1837	1.4e-13	-0.12441	0.016821	A2	MAPT-AS1	yes
rs111941646	17	43966608	A	T	0.7741	2.73e-08	0.0543	0.0098	T	A	0.1906	1.36e-13	-0.12448	0.016821	A2	MAPT-AS1	yes
rs62055557	17	43966795	A	C	0.2259	2.71e-08	-0.0543	0.0098	A	C	0.1837	1.45e-13	-0.12434	0.016822	A2	MAPT-AS1	yes
rs62055558	17	43966955	A	G	0.7741	2.71e-08	0.0543	0.0098	G	A	0.1837	1.51e-13	-0.12425	0.016822	A2	MAPT-AS1	yes
rs62055559	17	43967138	T	G	0.7741	2.93e-08	0.0542	0.0098	G	T	0.1837	1.46e-13	-0.12436	0.016825	A2	MAPT-AS1	yes
rs17691466	17	43968219	A	G	0.7741	2.71e-08	0.0543	0.0098	G	A	0.1837	1.18e-13	-0.12481	0.016822	A2	MAPT-AS1	yes
rs17691508	17	43968463	C	G	0.7741	2.76e-08	0.0543	0.0098	G	C	0.1906	1.51e-13	-0.12427	0.016824	A2	MAPT-AS1	yes
rs62056760	17	43968572	A	G	0.226	2.57e-08	-0.0544	0.0098	A	G	0.1837	1.78e-13	-0.12391	0.016826	A2	MAPT-AS1	yes
rs55895732	17	43968937	T	C	0.7741	2.82e-08	0.0543	0.0098	C	T	0.1837	1.56e-13	-0.12423	0.016828	A2	MAPT-AS1	yes
rs55960528	17	43968994	T	C	0.7741	2.23e-08	0.0546	0.0098	C	T	0.1836	2.43e-13	-0.12324	0.016831	A2	MAPT-AS1	yes
rs55877243	17	43969019	T	C	0.7741	2.29e-08	0.0546	0.0098	C	T	0.1836	2.23e-13	-0.12343	0.016829	A2	MAPT-AS1	yes
rs17770296	17	43969136	T	C	0.2259	2.63e-08	-0.0544	0.0098	T	C	0.182	1.13e-11	-0.12128	0.017863	A2	MAPT-AS1	yes
rs17691556	17	43969168	A	T	0.2259	2.72e-08	-0.0543	0.0098	A	T	0.1837	2.06e-13	-0.12359	0.016827	A2	MAPT-AS1	yes
rs62056773	17	43969833	A	G	0.7741	2.18e-08	0.0547	0.0098	G	A	0.1836	1.48e-13	-0.12437	0.016831	A2	MAPT-AS1	yes
rs62056774	17	43969901	A	G	0.2259	2.24e-08	-0.0547	0.0098	A	G	0.1836	1.95e-13	-0.12376	0.016833	A2	MAPT-AS1	yes
rs62056775	17	43969952	T	C	0.7741	2.07e-08	0.0548	0.0098	C	T	0.1836	1.84e-13	-0.12387	0.016831	A2	MAPT-AS1	yes
rs78729125	17	43970108	A	C	0.226	2.1e-08	-0.0548	0.0098	A	C	0.2276	3.9e-13	-0.12265	0.016897	A2	MAPT-AS1	yes
rs17770343	17	43970154	T	C	0.7741	2.43e-08	0.0545	0.0098	C	T	0.1836	1.36e-13	-0.12451	0.016824	A2	MAPT-AS1	yes
rs62056777	17	43970303	A	G	0.2258	2.36e-08	-0.0546	0.0098	A	G	0.1836	1.73e-13	-0.12404	0.016833	A2	MAPT-AS1	yes
rs17691610	17	43970662	T	G	0.2259	2.68e-08	-0.0543	0.0098	T	G	0.1837	1.58e-13	-0.12416	0.016824	A2	MAPT-AS1	yes
rs76594404	17	43971457	C	G	0.2259	2.77e-08	-0.0543	0.0098	C	G	0.1837	2.62e-13	-0.12307	0.01683	A2	MAPT-AS1	yes
rs80233201	17	43971481	T	C	0.7741	2.7e-08	0.0543	0.0098	C	T	0.1837	2.3e-13	-0.12337	0.01683	A2	MAPT-AS1	yes
rs62056778	17	43971604	C	G	0.7741	2.76e-08	0.0543	0.0098	G	C	0.1906	1.87e-13	-0.12379	0.016823	A2	MAPT-AS1	yes
rs11575895	17	43971785	A	G	0.7741	2.66e-08	0.0544	0.0098	G	A	0.1837	1.39e-13	-0.12453	0.016835	A2	MAPT-AS1	yes
rs11575896	17	43972142	A	G	0.2259	2.71e-08	-0.0543	0.0098	A	G	0.1837	1.6e-13	-0.12421	0.016833	A2	MAPT-AS1	yes
rs76324150	17	43973233	T	C	0.2259	2.72e-08	-0.0543	0.0098	T	C	0.1837	2.71e-13	-0.12303	0.016835	A2	MAPT-IT1	yes
rs78720789	17	43973413	A	G	0.7741	2.95e-08	0.0542	0.0098	G	A	0.1837	4.84e-13	-0.1218	0.016848	A2	MAPT-IT1	yes
rs62056780	17	43973652	T	C	0.2259	2.79e-08	-0.0543	0.0098	T	C	0.1837	3.74e-13	-0.12234	0.016841	A2	MAPT-IT1	yes
rs62056781	17	43973899	T	C	0.7741	2.82e-08	0.0543	0.0098	C	T	0.1837	2.67e-13	-0.12307	0.016835	A2	MAPT-IT1	yes
rs62056782	17	43974230	T	C	0.2259	2.79e-08	-0.0543	0.0098	T	C	0.1837	2.17e-13	-0.12348	0.016827	A2	MAPT-IT1	yes
rs80346216	17	43974476	T	G	0.2259	2.81e-08	-0.0543	0.0098	T	G	0.1837	2.74e-13	-0.12299	0.016833	A2	MAPT-IT1	yes
rs76632685	17	43974477	A	T	0.7741	2.67e-08	0.0543	0.0098	T	A	0.1906	1.53e-13	-0.12427	0.016828	A2	MAPT-IT1	yes
rs62056783	17	43974549	C	G	0.2259	2.79e-08	-0.0543	0.0098	C	G	0.1837	1.54e-13	-0.12422	0.016824	A2	MAPT-IT1	yes
rs62056784	17	43974889	C	G	0.7741	2.79e-08	0.0543	0.0098	G	C	0.1906	1.86e-13	-0.12382	0.016827	A2	MAPT-IT1	yes
rs62056785	17	43975263	T	C	0.7741	2.77e-08	0.0543	0.0098	C	T	0.1837	1.39e-13	-0.12444	0.016823	A2	MAPT-IT1	yes
rs62056786	17	43975285	T	C	0.7742	2.5e-08	0.0545	0.0098	C	T	0.182	8.37e-12	-0.12201	0.017858	A2	MAPT-IT1	yes
rs62056789	17	43975415	A	C	0.774	2.77e-08	0.0543	0.0098	C	A	0.1837	1.89e-13	-0.12411	0.01687	A2	MAPT-IT1	yes
rs62056790	17	43975417	A	G	0.2259	2.8e-08	-0.0543	0.0098	A	G	0.1837	2.54e-13	-0.12344	0.01687	A2	MAPT-IT1	yes
rs62056791	17	43976064	T	C	0.7741	2.91e-08	0.0542	0.0098	C	T	0.1837	1.36e-13	-0.12449	0.016822	A2	MAPT-IT1	yes
rs77561671	17	43976627	T	G	0.2259	2.49e-08	-0.0545	0.0098	T	G	0.1837	2.26e-13	-0.12339	0.016828	A2	MAPT	yes
rs62056792	17	43976644	A	G	0.2259	2.73e-08	-0.0543	0.0098	A	G	0.1837	1.72e-13	-0.12398	0.016825	A2	MAPT	yes
rs62056793	17	43977018	A	G	0.7741	2.8e-08	0.0543	0.0098	G	A	0.1837	1.32e-13	-0.12456	0.016823	A2	MAPT	yes
rs62056794	17	43977049	A	G	0.7741	2.8e-08	0.0543	0.0098	G	A	0.1837	1.41e-13	-0.12441	0.016821	A2	MAPT	yes
rs1864324	17	43977702	T	C	0.2259	2.65e-08	-0.0544	0.0098	T	C	0.1837	2.5e-13	-0.12319	0.016832	A2	MAPT	yes
rs1864325	17	43977827	T	C	0.226	2.6e-08	-0.0544	0.0098	T	C	0.1837	2.59e-13	-0.12307	0.016826	A2	MAPT	yes
rs62056795	17	43978041	T	C	0.2259	2.63e-08	-0.0544	0.0098	T	C	0.1837	1.54e-13	-0.12423	0.016825	A2	MAPT	yes
rs62056796	17	43978120	A	G	0.7741	2.64e-08	0.0544	0.0098	G	A	0.1837	1.45e-13	-0.12436	0.016825	A2	MAPT	yes
rs1467962	17	43978604	A	G	0.7741	2.67e-08	0.0543	0.0098	G	A	0.1837	1.78e-13	-0.12391	0.016826	A2	MAPT	yes
rs1467963	17	43978934	T	G	0.7741	2.64e-08	0.0544	0.0098	G	T	0.1837	1.46e-13	-0.12432	0.01682	A2	MAPT	yes
rs62056800	17	43979468	A	T	0.2259	2.71e-08	-0.0543	0.0098	A	T	0.1837	2.39e-13	-0.12329	0.016831	A2	MAPT	yes
rs62056801	17	43979504	A	G	0.2259	2.63e-08	-0.0544	0.0098	A	G	0.1837	2.14e-13	-0.12349	0.016825	A2	MAPT	yes
rs113834264	17	43979622	A	G	0.2259	2.68e-08	-0.0543	0.0098	A	G	0.1837	1.59e-13	-0.12418	0.016828	A2	MAPT	yes
rs2099151	17	43979822	A	T	0.774	2.85e-08	0.0542	0.0098	T	A	0.1906	1.8e-13	-0.12388	0.016825	A2	MAPT	yes
rs2082068	17	43979971	T	C	0.2259	2.62e-08	-0.0544	0.0098	T	C	0.1837	2.48e-13	-0.12324	0.016836	A2	MAPT	yes
rs1984937	17	43980530	A	C	0.7741	2.65e-08	0.0544	0.0098	C	A	0.1837	1.54e-13	-0.12426	0.016829	A2	MAPT	yes
rs62056803	17	43982159	A	G	0.774	2.68e-08	0.0543	0.0098	G	A	0.1837	1.41e-13	-0.12444	0.016826	A2	MAPT	yes
rs62056804	17	43982286	T	C	0.2259	2.67e-08	-0.0544	0.0098	T	C	0.1837	1.66e-13	-0.12408	0.016827	A2	MAPT	yes
rs77084869	17	43982903	A	G	0.7741	2.71e-08	0.0543	0.0098	G	A	0.2275	2.65e-13	-0.12347	0.016889	A2	MAPT	yes
rs74573628	17	43982961	T	C	0.7741	2.76e-08	0.0543	0.0098	C	T	0.1836	1.52e-13	-0.12424	0.016822	A2	MAPT	yes
rs75617973	17	43983159	T	C	0.7741	2.59e-08	0.0544	0.0098	C	T	0.1837	1.24e-13	-0.12469	0.016821	A2	MAPT	yes
rs62056805	17	43983363	A	G	0.2259	2.76e-08	-0.0543	0.0098	A	G	0.1837	1.96e-13	-0.1237	0.016827	A2	MAPT	yes
rs62056806	17	43983801	A	G	0.7741	2.53e-08	0.0544	0.0098	G	A	0.1837	1.94e-13	-0.12368	0.016821	A2	MAPT	yes
rs62056807	17	43984253	C	G	0.2259	2.7e-08	-0.0543	0.0098	C	G	0.1837	1.46e-13	-0.12433	0.016823	A2	MAPT	yes
rs1467966	17	43984399	T	C	0.2259	2.57e-08	-0.0544	0.0098	T	C	0.1837	1.68e-13	-0.12402	0.016823	A2	MAPT	yes
rs62056808	17	43984646	T	C	0.7745	3.18e-08	0.0541	0.0098	C	T	0.1832	3.12e-13	-0.12266	0.016827	A2	MAPT	yes
rs62056810	17	43984672	T	C	0.7745	3.26e-08	0.0541	0.0098	C	T	0.1832	4.92e-13	-0.12165	0.016832	A2	MAPT	yes
rs79492906	17	43984864	T	C	0.2259	2.49e-08	-0.0545	0.0098	T	C	0.1837	1.63e-13	-0.12411	0.016826	A2	MAPT	yes
rs62056811	17	43985247	T	C	0.2259	2.65e-08	-0.0544	0.0098	T	C	0.1837	1.22e-13	-0.12478	0.01683	A2	MAPT	yes
rs74509629	17	43985597	T	C	0.2259	2.62e-08	-0.0544	0.0098	T	C	0.1837	1.7e-13	-0.12404	0.01683	A2	MAPT	yes
rs79290980	17	43985662	T	C	0.7741	2.53e-08	0.0545	0.0098	C	T	0.1837	1.31e-13	-0.12457	0.016822	A2	MAPT	yes
rs4371195	17	43986420	A	G	0.7741	2.61e-08	0.0544	0.0098	G	A	0.1836	1.6e-13	-0.12416	0.016827	A2	MAPT	yes
rs12150125	17	43986432	A	G	0.226	2.38e-08	-0.0546	0.0098	A	G	0.1838	2.68e-13	-0.12304	0.016832	A2	MAPT	yes
rs12150527	17	43986462	A	G	0.7742	2.82e-08	0.0543	0.0098	G	A	0.1835	1.49e-13	-0.12433	0.016828	A2	MAPT	yes
rs7502888	17	43986992	C	G	0.2259	2.44e-08	-0.0545	0.0098	C	G	0.1837	1.55e-13	-0.12422	0.016826	A2	MAPT	yes
rs28439143	17	43987723	A	G	0.2254	2.13e-08	-0.0548	0.0098	A	G	0.1832	8.09e-14	-0.12588	0.016854	A2	MAPT	yes
rs56189701	17	43987801	T	C	0.7748	2.33e-08	0.0547	0.0098	C	T	0.1833	1.57e-13	-0.12427	0.016837	A2	MAPT	yes
rs62056835	17	43988623	A	G	0.2259	2.43e-08	-0.0545	0.0098	A	G	0.1837	1.26e-13	-0.12469	0.016827	A2	MAPT	yes
rs62056837	17	43988884	T	C	0.7741	2.17e-08	0.0547	0.0098	C	T	0.1837	1.14e-13	-0.12492	0.016827	A2	MAPT	yes
rs62056838	17	43989087	A	G	0.7741	2.36e-08	0.0546	0.0098	G	A	0.1837	1.17e-13	-0.12481	0.016821	A2	MAPT	yes
rs62056839	17	43989221	T	C	0.7741	2.36e-08	0.0546	0.0098	C	T	0.1837	1.22e-13	-0.12472	0.016821	A2	MAPT	yes
rs62056840	17	43989689	T	C	0.774	2.51e-08	0.0545	0.0098	C	T	0.1837	1.71e-13	-0.12401	0.016828	A2	MAPT	yes
rs112116311	17	43989898	T	G	0.7741	2.54e-08	0.0544	0.0098	G	T	0.1837	1.89e-13	-0.12381	0.01683	A2	MAPT	yes
rs62056841	17	43990041	A	C	0.7741	2.35e-08	0.0546	0.0098	C	A	0.1836	1.15e-13	-0.12487	0.016823	A2	MAPT	yes
rs79860128	17	43990072	A	G	0.7741	2.48e-08	0.0545	0.0098	G	A	0.1837	1.23e-13	-0.12471	0.016822	A2	MAPT	yes
rs9944484	17	43990662	A	G	0.2261	2.61e-08	-0.0544	0.0098	A	G	0.1838	1.67e-13	-0.12403	0.016822	A2	MAPT	yes
rs17563965	17	43990919	A	G	0.774	2.42e-08	0.0545	0.0098	G	A	0.1837	1.44e-13	-0.12437	0.016823	A2	MAPT	yes
rs17563986	17	43991272	A	G	0.7741	2.5e-08	0.0545	0.0098	G	A	0.1837	1.97e-13	-0.12375	0.016834	A2	MAPT	yes
rs17564020	17	43991781	T	G	0.2261	3e-08	-0.0541	0.0098	T	G	0.1821	8.51e-12	-0.12192	0.017852	A2	MAPT	yes
rs55682376	17	43991888	A	G	0.2259	2.56e-08	-0.0544	0.0098	A	G	0.1837	1.83e-13	-0.12386	0.016826	A2	MAPT	yes
rs55788678	17	43992233	T	C	0.2255	2.32e-08	-0.0547	0.0098	T	C	0.1832	2.61e-13	-0.12308	0.01683	A2	MAPT	yes
rs55810795	17	43992283	A	G	0.7743	2.53e-08	0.0545	0.0098	G	A	0.1833	1.29e-13	-0.12459	0.01682	A2	MAPT	yes
rs55933304	17	43992305	A	G	0.2257	2.56e-08	-0.0545	0.0098	A	G	0.1834	2.89e-13	-0.12288	0.016834	A2	MAPT	yes
rs62056848	17	43992456	A	G	0.2259	2.47e-08	-0.0545	0.0098	A	G	0.1837	1.43e-13	-0.12438	0.016823	A2	MAPT	yes
rs62056850	17	43992581	T	C	0.2265	4.22e-08	-0.0535	0.0098	T	C	0.1842	6.12e-14	-0.12624	0.016819	A2	MAPT	yes
rs62056851	17	43992806	A	G	0.7741	2.5e-08	0.0545	0.0098	G	A	0.2275	3.33e-13	-0.12298	0.016893	A2	MAPT	yes
rs77926909	17	43994252	T	C	0.7737	2.32e-08	0.0546	0.0098	C	T	0.1839	7.78e-14	-0.12576	0.016826	A2	MAPT	yes
rs111541901	17	43994358	T	C	0.2257	2.28e-08	-0.0547	0.0098	T	C	0.1835	1.58e-13	-0.12426	0.016838	A2	MAPT	yes
rs17649518	17	43994386	A	C	0.2259	2.33e-08	-0.0546	0.0098	A	C	0.1836	1.08e-13	-0.125	0.016823	A2	MAPT	yes
rs62056859	17	43994435	A	G	0.774	2.1e-08	0.0548	0.0098	G	A	0.1837	1.04e-13	-0.12508	0.016822	A2	MAPT	yes
rs112647192	17	43994623	A	G	0.2259	2.42e-08	-0.0546	0.0098	A	G	0.1837	1.21e-13	-0.12481	0.01683	A2	MAPT	yes
rs17649553	17	43994648	T	C	0.2262	4.43e-08	-0.0535	0.0098	T	C	0.1825	8.27e-12	-0.12201	0.017854	A2	MAPT	yes
rs17649571	17	43994952	A	G	0.7741	2.58e-08	0.0544	0.0098	G	A	0.1837	1.34e-13	-0.12453	0.016822	A2	MAPT	yes
rs17564153	17	43995098	A	G	0.2259	2.18e-08	-0.0547	0.0098	A	G	0.1837	3.61e-13	-0.12239	0.016836	A2	MAPT	yes
rs17649635	17	43995990	A	G	0.7741	2.67e-08	0.0544	0.0098	G	A	0.1837	1.43e-13	-0.12438	0.016822	A2	MAPT	yes
rs56303672	17	43996960	A	G	0.774	2.77e-08	0.0543	0.0098	G	A	0.1837	2.07e-13	-0.12359	0.016829	A2	MAPT	yes
rs17649641	17	43997372	T	C	0.774	2.08e-08	0.0548	0.0098	C	T	0.182	8.72e-12	-0.12194	0.017863	A2	MAPT	yes
rs75046472	17	43997499	A	T	0.7741	2.7e-08	0.0544	0.0098	T	A	0.1906	1.4e-13	-0.12448	0.01683	A2	MAPT	yes
rs17564223	17	43997520	T	C	0.2258	2.77e-08	-0.0543	0.0098	T	C	0.1837	1.64e-13	-0.12412	0.016828	A2	MAPT	yes
rs17649700	17	43997901	C	G	0.226	2.44e-08	-0.0545	0.0098	C	G	0.1837	1.39e-13	-0.12447	0.016826	A2	MAPT	yes
rs62058962	17	43998151	T	C	0.2259	2.23e-08	-0.0547	0.0098	T	C	0.1836	1.49e-13	-0.12431	0.016827	A2	MAPT	yes
rs1467969	17	43998328	T	C	0.2259	2.3e-08	-0.0546	0.0098	T	C	0.1836	2.67e-13	-0.12315	0.016846	A2	MAPT	yes
rs1467970	17	43998574	T	G	0.7741	2.3e-08	0.0546	0.0098	G	T	0.1836	1.16e-13	-0.12484	0.016823	A2	MAPT	yes
rs767058	17	43998767	T	C	0.7739	2.24e-08	0.0547	0.0098	C	T	0.1838	6.42e-13	-0.12113	0.016845	A2	MAPT	yes
rs767056	17	43998910	T	C	0.2258	2.38e-08	-0.0546	0.0098	T	C	0.1819	1.87e-11	-0.12016	0.017893	A2	MAPT	yes
rs767059	17	43999100	C	G	0.2259	2.62e-08	-0.0544	0.0098	C	G	0.1802	2.9e-13	-0.12295	0.016845	A2	MAPT	yes
rs62058964	17	43999406	A	G	0.7741	2.6e-08	0.0544	0.0098	G	A	0.1837	1.52e-13	-0.12433	0.016835	A2	MAPT	yes
rs62058965	17	43999529	C	G	0.2259	2.64e-08	-0.0544	0.0098	C	G	0.1837	1.43e-13	-0.12439	0.016823	A2	MAPT	yes
rs55929431	17	44000202	A	G	0.226	2.52e-08	-0.0545	0.0098	A	G	0.1837	1.38e-13	-0.12449	0.016826	A2	MAPT	yes
rs8079501	17	44000234	A	T	0.774	2.61e-08	0.0544	0.0098	T	A	0.1906	1.23e-13	-0.12471	0.016822	A2	MAPT	yes
rs56002706	17	44000505	T	C	0.2259	2.62e-08	-0.0544	0.0098	T	C	0.1837	1.6e-13	-0.12415	0.016826	A2	MAPT	yes
rs8078495	17	44000610	A	G	0.2259	2.73e-08	-0.0543	0.0098	A	G	0.1837	1.56e-13	-0.1242	0.016825	A2	MAPT	yes
rs17649866	17	44000914	T	C	0.7741	2.71e-08	0.0544	0.0098	C	T	0.1837	1.38e-13	-0.12447	0.016824	A2	MAPT	yes
rs62058968	17	44001228	A	G	0.2259	2.76e-08	-0.0543	0.0098	A	G	0.1837	1.72e-13	-0.12405	0.016834	A2	MAPT	yes
rs17564493	17	44001379	T	C	0.226	2.76e-08	-0.0543	0.0098	T	C	0.182	6.84e-12	-0.12254	0.017861	A2	MAPT	yes
rs17649918	17	44001621	A	G	0.7742	2.8e-08	0.0543	0.0098	G	A	0.182	1.33e-11	-0.12092	0.017875	A2	MAPT	yes
rs17649954	17	44001661	A	G	0.7741	2.66e-08	0.0544	0.0098	G	A	0.1837	1.37e-13	-0.12451	0.016828	A2	MAPT	yes
rs55685451	17	44001957	T	G	0.7741	2.66e-08	0.0544	0.0098	G	T	0.1837	2.15e-13	-0.12357	0.016836	A2	MAPT	yes
rs17564591	17	44002062	A	C	0.7741	2.68e-08	0.0544	0.0098	C	A	0.1837	1.73e-13	-0.12398	0.016827	A2	MAPT	yes
rs17564619	17	44002138	A	G	0.7741	2.61e-08	0.0544	0.0098	G	A	0.1837	1.58e-13	-0.12421	0.016831	A2	MAPT	yes
rs62059003	17	44002431	T	C	0.2259	2.7e-08	-0.0544	0.0098	T	C	0.1836	2e-13	-0.1237	0.016833	A2	MAPT	yes
rs17650063	17	44002555	A	G	0.7741	2.68e-08	0.0544	0.0098	G	A	0.1837	1.43e-13	-0.12444	0.01683	A2	MAPT	yes
rs17564703	17	44002595	T	C	0.2259	2.56e-08	-0.0545	0.0098	T	C	0.182	1.02e-11	-0.12157	0.017867	A2	MAPT	yes
rs76090253	17	44002969	A	C	0.774	2.69e-08	0.0544	0.0098	C	A	0.1837	1.14e-13	-0.12487	0.016822	A2	MAPT	yes
rs55788597	17	44003397	A	T	0.2259	2.6e-08	-0.0544	0.0098	A	T	0.1837	1.6e-13	-0.12426	0.016841	A2	MAPT	yes
rs56249311	17	44003599	T	C	0.2259	2.96e-08	-0.0542	0.0098	T	C	0.1837	1.87e-13	-0.12383	0.01683	A2	MAPT	yes
rs62059004	17	44003893	A	G	0.774	2.92e-08	0.0542	0.0098	G	A	0.1837	2.1e-13	-0.12367	0.016844	A2	MAPT	yes
rs76500077	17	44004076	T	C	0.7741	2.61e-08	0.0544	0.0098	C	T	0.1836	1.64e-13	-0.12408	0.016824	A2	MAPT	yes
rs62059005	17	44004472	A	G	0.7741	2.67e-08	0.0544	0.0098	G	A	0.182	9.51e-12	-0.1217	0.017861	A2	MAPT	yes
rs62059007	17	44005615	A	G	0.7741	2.64e-08	0.0544	0.0098	G	A	0.1836	1.03e-13	-0.12513	0.016825	A2	MAPT	yes
rs62061705	17	44006252	T	C	0.774	2.59e-08	0.0544	0.0098	C	T	0.1837	1.6e-13	-0.12417	0.016829	A2	MAPT	yes
rs17564829	17	44006601	T	C	0.7741	2.69e-08	0.0544	0.0098	C	T	0.1837	1.28e-13	-0.12463	0.016822	A2	MAPT	yes
rs62061707	17	44006954	T	C	0.7746	1.87e-08	0.0551	0.0098	C	T	0.1828	1.74e-13	-0.1241	0.016844	A2	MAPT	yes
rs62061708	17	44006956	A	G	0.7746	1.92e-08	0.055	0.0098	G	A	0.1828	1.87e-13	-0.12391	0.016841	A2	MAPT	yes
rs62061709	17	44007493	T	C	0.2259	2.67e-08	-0.0544	0.0098	T	C	0.1837	1.39e-13	-0.12444	0.016823	A2	MAPT	yes
rs2316782	17	44010040	A	G	0.7741	2.83e-08	0.0543	0.0098	G	A	0.182	1.13e-11	-0.12125	0.01786	A2	MAPT	yes
rs2316783	17	44010118	C	G	0.2259	2.82e-08	-0.0543	0.0098	C	G	0.1837	1.66e-13	-0.12406	0.016823	A2	MAPT	yes
rs4255816	17	44010364	C	G	0.7741	2.81e-08	0.0543	0.0098	G	C	0.1906	2.03e-13	-0.12371	0.016839	A2	MAPT	yes
rs62061713	17	44010405	A	G	0.7741	2.78e-08	0.0543	0.0098	G	A	0.1837	1.48e-13	-0.12436	0.016831	A2	MAPT	yes
rs62061714	17	44010452	A	C	0.2262	3.37e-08	-0.054	0.0098	A	C	0.2275	5.92e-13	-0.12178	0.016909	A2	MAPT	yes
rs78077519	17	44010984	A	G	0.2259	2.88e-08	-0.0543	0.0098	A	G	0.1837	2.18e-13	-0.12349	0.016831	A2	MAPT	yes
rs17564871	17	44011018	A	G	0.7741	2.39e-08	0.0546	0.0098	G	A	0.1819	1.32e-11	-0.12095	0.017874	A2	MAPT	yes
rs17650258	17	44011073	A	G	0.2259	2.81e-08	-0.0543	0.0098	A	G	0.1837	1.59e-13	-0.1242	0.016829	A2	MAPT	yes
rs62061715	17	44011526	A	G	0.7741	2.78e-08	0.0543	0.0098	G	A	0.1837	1.71e-13	-0.12402	0.016828	A2	MAPT	yes
rs17564948	17	44011749	A	G	0.7741	2.8e-08	0.0543	0.0098	G	A	0.1837	1.55e-13	-0.12423	0.016828	A2	MAPT	yes
rs62061716	17	44012096	A	G	0.7741	2.81e-08	0.0543	0.0098	G	A	0.1837	1.66e-13	-0.12412	0.016833	A2	MAPT	yes
rs17650335	17	44012343	A	G	0.2259	2.7e-08	-0.0544	0.0098	A	G	0.1837	2.18e-13	-0.12349	0.016831	A2	MAPT	yes
rs17565025	17	44012463	T	C	0.7734	2.94e-08	0.0542	0.0098	C	T	0.1839	2e-13	-0.12345	0.0168	A2	MAPT	yes
rs77924424	17	44012915	T	C	0.7741	2.76e-08	0.0544	0.0098	C	T	0.1837	2.1e-13	-0.12361	0.016835	A2	MAPT	yes
rs17650417	17	44013103	T	G	0.2259	2.46e-08	-0.0545	0.0098	T	G	0.1835	1.95e-13	-0.12377	0.016833	A2	MAPT	yes
rs62061720	17	44013189	T	C	0.2259	2.54e-08	-0.0545	0.0098	T	C	0.1837	1.63e-13	-0.12414	0.01683	A2	MAPT	yes
rs62061721	17	44013346	T	C	0.7741	2.78e-08	0.0543	0.0098	C	T	0.1837	1.8e-13	-0.12394	0.016832	A2	MAPT	yes
rs79857651	17	44013475	A	G	0.2254	3.05e-08	-0.0543	0.0098	A	G	0.183	1.8e-13	-0.12393	0.016833	A2	MAPT	yes
rs113756354	17	44013483	A	G	0.7746	3.07e-08	0.0543	0.0098	G	A	0.1831	1.67e-13	-0.12407	0.016828	A2	MAPT	yes
rs12150111	17	44013938	A	G	0.7741	2.89e-08	0.0543	0.0098	G	A	0.182	1.07e-11	-0.12143	0.017867	A2	MAPT	yes
rs12150195	17	44014263	T	C	0.7741	2.78e-08	0.0543	0.0098	C	T	0.182	1.09e-11	-0.12141	0.017869	A2	MAPT	yes
rs55874169	17	44014384	A	G	0.2259	3.03e-08	-0.0542	0.0098	A	G	0.1837	1.73e-13	-0.12401	0.016831	A2	MAPT	yes
rs12150229	17	44015446	A	G	0.7745	3.43e-08	0.054	0.0098	G	A	0.1831	2.04e-13	-0.12357	0.016821	A2	MAPT	yes
rs12150230	17	44015464	A	G	0.7745	3.21e-08	0.0542	0.0098	G	A	0.1815	1.09e-11	-0.12129	0.017851	A2	MAPT	yes
rs12150576	17	44015624	A	G	0.2259	2.99e-08	-0.0542	0.0098	A	G	0.1837	1.86e-13	-0.12387	0.016833	A2	MAPT	yes
rs12150235	17	44015745	A	G	0.7742	2.98e-08	0.0542	0.0098	G	A	0.1836	1.61e-13	-0.12417	0.016831	A2	MAPT	yes
rs12150104	17	44015929	A	G	0.2259	3e-08	-0.0542	0.0098	A	G	0.1837	1.46e-13	-0.12436	0.016827	A2	MAPT	yes
rs62061725	17	44016157	C	G	0.2258	2.87e-08	-0.0543	0.0098	C	G	0.1836	2.01e-13	-0.1237	0.016835	A2	MAPT	yes
rs62061726	17	44016341	A	G	0.2259	2.99e-08	-0.0542	0.0098	A	G	0.1837	2.01e-13	-0.12372	0.016837	A2	MAPT	yes
rs113537106	17	44016462	A	G	0.7741	2.99e-08	0.0542	0.0098	G	A	0.1837	1.67e-13	-0.1241	0.016832	A2	MAPT	yes
rs62061727	17	44017124	T	G	0.2259	3.23e-08	-0.0541	0.0098	T	G	0.1836	2.14e-13	-0.12358	0.016837	A2	MAPT	yes
rs62061728	17	44017180	T	G	0.7741	3.02e-08	0.0542	0.0098	G	T	0.1836	1.66e-13	-0.12413	0.016834	A2	MAPT	yes
rs62061730	17	44017342	A	G	0.7742	3.17e-08	0.0541	0.0098	G	A	0.1837	1.73e-13	-0.12401	0.01683	A2	MAPT	yes
rs62061732	17	44017941	T	G	0.2259	3.05e-08	-0.0542	0.0098	T	G	0.1836	3.2e-13	-0.12271	0.016842	A2	MAPT	yes
rs62062768	17	44019479	C	G	0.7743	3.43e-08	0.054	0.0098	G	C	0.1905	2.08e-13	-0.1237	0.016845	A2	MAPT	yes
rs62062769	17	44019643	A	G	0.2258	2.91e-08	-0.0543	0.0098	A	G	0.1837	1.13e-13	-0.12499	0.016834	A2	MAPT	yes
rs62062770	17	44019680	T	C	0.7743	3.02e-08	0.0542	0.0098	C	T	0.1837	1.43e-13	-0.12447	0.016834	A2	MAPT	yes
rs62062771	17	44020282	A	G	0.2257	3.45e-08	-0.054	0.0098	A	G	0.1836	1.1e-13	-0.12504	0.016834	A2	MAPT	yes
rs62062773	17	44020545	A	G	0.7742	2.82e-08	0.0543	0.0098	G	A	0.1836	1.24e-13	-0.12477	0.016832	A2	MAPT	yes
rs79115768	17	44021061	T	C	0.2258	3.06e-08	-0.0542	0.0098	T	C	0.1836	1.67e-13	-0.12414	0.016836	A2	MAPT	yes
rs28416808	17	44021218	T	C	0.226	2.55e-08	-0.0545	0.0098	T	C	0.182	8.07e-12	-0.12216	0.017867	A2	MAPT	yes
rs62062774	17	44021463	T	C	0.7743	3.08e-08	0.0542	0.0098	C	T	0.1836	1.3e-13	-0.12466	0.016832	A2	MAPT	yes
rs2316784	17	44021699	T	G	0.2252	3.22e-08	-0.0542	0.0098	T	G	0.1811	1.51e-11	-0.12076	0.017899	A2	MAPT	yes
rs62062776	17	44022043	A	C	0.7743	2.8e-08	0.0544	0.0098	C	A	0.1836	1.21e-13	-0.12486	0.016836	A2	MAPT	yes
rs75839508	17	44022319	A	G	0.2257	2.92e-08	-0.0543	0.0098	A	G	0.1836	2.18e-13	-0.12357	0.016842	A2	MAPT	yes
rs79765413	17	44022433	T	C	0.7747	3.84e-08	0.0539	0.0098	C	T	0.183	1.9e-13	-0.124	0.016857	A2	MAPT	yes
rs78834738	17	44022434	A	G	0.2253	3.62e-08	-0.054	0.0098	A	G	0.183	2.78e-13	-0.12317	0.016862	A2	MAPT	yes
rs62062778	17	44022528	A	G	0.7743	3.18e-08	0.0541	0.0098	G	A	0.1835	1.81e-13	-0.12399	0.016841	A2	MAPT	yes
rs62062779	17	44022577	A	C	0.7745	2.61e-08	0.0545	0.0098	C	A	0.1833	2.34e-13	-0.12345	0.016847	A2	MAPT	yes
rs62062780	17	44022593	T	C	0.2255	2.76e-08	-0.0544	0.0098	T	C	0.1833	2.65e-13	-0.12316	0.016846	A2	MAPT	yes
rs62062781	17	44022632	A	G	0.2257	3.01e-08	-0.0542	0.0098	A	G	0.1835	1.59e-13	-0.12423	0.016835	A2	MAPT	yes
rs62062782	17	44023087	A	G	0.2257	3.22e-08	-0.0541	0.0098	A	G	0.1836	1.41e-13	-0.12449	0.016833	A2	MAPT	yes
rs62062783	17	44023520	T	G	0.7743	3.04e-08	0.0542	0.0098	G	T	0.1836	1.81e-13	-0.124	0.016843	A2	MAPT	yes
rs62062784	17	44024552	C	G	0.7742	2.6e-08	0.0545	0.0098	G	C	0.1905	3.49e-13	-0.12264	0.016861	A2	MAPT	yes
rs62062785	17	44024562	T	G	0.2257	2.8e-08	-0.0544	0.0098	T	G	0.1836	2.97e-13	-0.12294	0.016851	A2	MAPT	yes
rs62062788	17	44024906	A	G	0.7743	2.88e-08	0.0543	0.0098	G	A	0.1836	1.71e-13	-0.12413	0.016842	A2	MAPT	yes
rs62062789	17	44025033	T	C	0.7748	2.15e-08	0.0549	0.0098	C	T	0.1829	2.19e-13	-0.12358	0.016844	A2	MAPT	yes
rs62062790	17	44025045	T	C	0.2253	2.1e-08	-0.0549	0.0098	T	C	0.1829	3.23e-13	-0.12272	0.016847	A2	MAPT	yes
rs62062791	17	44025273	A	G	0.2257	2.9e-08	-0.0543	0.0098	A	G	0.1836	1.06e-13	-0.12512	0.016832	A2	MAPT	yes
rs62062792	17	44025347	T	C	0.7743	2.9e-08	0.0543	0.0098	C	T	0.1836	1.35e-13	-0.12462	0.016837	A2	MAPT	yes
rs113395365	17	44025650	T	C	0.7743	2.91e-08	0.0543	0.0098	C	T	0.1836	1.05e-13	-0.12514	0.016832	A2	MAPT	yes
rs62062793	17	44026321	T	C	0.7743	2.86e-08	0.0543	0.0098	C	T	0.1836	1.02e-13	-0.12521	0.016834	A2	MAPT	yes
rs62062794	17	44026394	A	G	0.7743	2.87e-08	0.0543	0.0098	G	A	0.1836	1.27e-13	-0.12472	0.016832	A2	MAPT	yes
rs242561	17	44026548	T	C	0.2311	4.44e-08	-0.0538	0.0098	C	T	0.8166	4.14e-12	0.12412	0.017904	A2	MAPT	yes
rs62062795	17	44027090	T	C	0.2257	3.02e-08	-0.0542	0.0098	T	C	0.1836	1.57e-13	-0.12428	0.016836	A2	MAPT	yes
rs62062796	17	44027316	A	G	0.2257	3.61e-08	-0.0539	0.0098	A	G	0.1835	1.67e-13	-0.12417	0.01684	A2	MAPT	yes
rs62062797	17	44027366	T	G	0.7749	2.57e-08	0.0546	0.0098	G	T	0.1827	1.57e-13	-0.12424	0.016832	A2	MAPT	yes
rs62062798	17	44027383	A	G	0.7749	2.95e-08	0.0544	0.0098	G	A	0.1827	1.78e-13	-0.12397	0.016833	A2	MAPT	yes
rs62062800	17	44027753	A	G	0.7743	2.92e-08	0.0543	0.0098	G	A	0.1836	1.54e-13	-0.12431	0.016836	A2	MAPT	yes
rs62062801	17	44028011	T	G	0.7743	2.82e-08	0.0543	0.0098	G	T	0.2275	2.79e-13	-0.12347	0.016904	A2	MAPT	yes
rs62062802	17	44028045	T	G	0.2258	2.73e-08	-0.0544	0.0098	T	G	0.2275	3.14e-13	-0.12323	0.016907	A2	MAPT	yes
rs62062803	17	44028183	T	C	0.7742	2.68e-08	0.0544	0.0098	C	T	0.1837	1.29e-13	-0.1247	0.016835	A2	MAPT	yes
rs74903707	17	44028707	A	G	0.2258	2.76e-08	-0.0544	0.0098	A	G	0.1836	1.29e-13	-0.12468	0.016832	A2	MAPT	yes
rs77017444	17	44028796	T	C	0.7743	2.35e-08	0.0547	0.0098	C	T	0.1836	1.54e-13	-0.12434	0.016839	A2	MAPT	yes
rs76839282	17	44029178	C	G	0.2256	2.77e-08	-0.0544	0.0098	C	G	0.1836	1.55e-13	-0.1243	0.016837	A2	MAPT	yes
rs17650579	17	44030115	T	C	0.2257	2.94e-08	-0.0543	0.0098	T	C	0.1837	1.57e-13	-0.12428	0.016838	A2	MAPT	yes
rs17650597	17	44030195	A	T	0.7743	2.74e-08	0.0544	0.0098	T	A	0.1905	1.4e-13	-0.12452	0.016834	A2	MAPT	yes
rs17650633	17	44030231	T	C	0.7743	2.8e-08	0.0544	0.0098	C	T	0.1836	1.33e-13	-0.12461	0.016833	A2	MAPT	yes
rs17650651	17	44030311	T	G	0.7743	2.73e-08	0.0544	0.0098	G	T	0.1836	1.22e-13	-0.12481	0.016832	A2	MAPT	yes
rs62062805	17	44030773	A	G	0.7743	2.53e-08	0.0545	0.0098	G	A	0.1835	1.43e-13	-0.12447	0.016835	A2	MAPT	yes
rs62062806	17	44031420	A	G	0.2258	2.77e-08	-0.0544	0.0098	A	G	0.1836	1.34e-13	-0.12459	0.016832	A2	MAPT	yes
rs55978005	17	44031540	T	G	0.2257	2.77e-08	-0.0544	0.0098	T	G	0.1836	1.42e-13	-0.12446	0.016831	A2	MAPT	yes
rs55946323	17	44031946	A	G	0.7743	2.6e-08	0.0545	0.0098	G	A	0.1836	1.03e-13	-0.12519	0.016832	A2	MAPT	yes
rs56317731	17	44032073	A	G	0.7743	2.76e-08	0.0544	0.0098	G	A	0.1836	1.37e-13	-0.12456	0.016835	A2	MAPT	yes
rs56080482	17	44032597	A	G	0.2257	2.93e-08	-0.0543	0.0098	A	G	0.1836	2.41e-13	-0.12335	0.016842	A2	MAPT	yes
rs17571718	17	44032768	T	C	0.7742	2.91e-08	0.0543	0.0098	C	T	0.1836	1.36e-13	-0.12456	0.016832	A2	MAPT	yes
rs78555354	17	44032879	A	G	0.7744	2.99e-08	0.0543	0.0098	G	A	0.1835	1.7e-13	-0.12411	0.016839	A2	MAPT	yes
rs17571739	17	44032915	T	C	0.7745	3.53e-08	0.054	0.0098	C	T	0.1833	1.98e-13	-0.12369	0.016829	A2	MAPT	yes
rs62062813	17	44032956	A	G	0.2255	3.57e-08	-0.054	0.0098	A	G	0.1833	2.05e-13	-0.1236	0.016827	A2	MAPT	yes
rs62063262	17	44033002	T	C	0.7743	3.12e-08	0.0542	0.0098	C	T	0.1836	1.24e-13	-0.12465	0.016817	A2	MAPT	yes
rs113277432	17	44033169	T	C	0.776	3.88e-08	0.0541	0.0098	C	T	0.1813	3.21e-13	-0.12305	0.016891	A2	MAPT	yes
rs62063263	17	44033394	C	G	0.2252	2.44e-08	-0.0547	0.0098	C	G	0.1828	2.78e-13	-0.12297	0.016835	A2	MAPT	yes
rs62063264	17	44033401	T	C	0.2252	2.43e-08	-0.0547	0.0098	T	C	0.1828	3.44e-13	-0.1225	0.016836	A2	MAPT	yes
rs62063265	17	44033468	A	G	0.2257	3.64e-08	-0.0539	0.0098	A	G	0.1835	1.85e-13	-0.12382	0.016825	A2	MAPT	yes
rs62063266	17	44033488	T	C	0.2257	3.26e-08	-0.0541	0.0098	T	C	0.1835	1.59e-13	-0.12414	0.016823	A2	MAPT	yes
rs17571781	17	44033802	T	C	0.7742	2.94e-08	0.0543	0.0098	C	T	0.1819	7.69e-12	-0.12231	0.017871	A2	MAPT	yes
rs62063269	17	44034833	A	G	0.2257	2.86e-08	-0.0544	0.0098	A	G	0.1835	1.05e-13	-0.12517	0.016835	A2	MAPT	yes
rs17571809	17	44034859	A	G	0.7742	2.96e-08	0.0543	0.0098	G	A	0.1835	1.21e-13	-0.12484	0.016835	A2	MAPT	yes
rs17650771	17	44035367	A	G	0.7741	2.69e-08	0.0544	0.0098	G	A	0.1836	1.05e-13	-0.12515	0.016832	A2	MAPT	yes
rs77555455	17	44035516	A	G	0.2259	2.76e-08	-0.0544	0.0098	A	G	0.1836	1.1e-13	-0.12504	0.016833	A2	MAPT	yes
rs17571857	17	44035706	A	G	0.7741	2.74e-08	0.0544	0.0098	G	A	0.1819	9.04e-12	-0.12192	0.017875	A2	MAPT	yes
rs62063271	17	44036047	A	G	0.2259	2.95e-08	-0.0543	0.0098	A	G	0.1837	2.25e-13	-0.12353	0.016844	A2	MAPT	yes
rs112916880	17	44036129	T	C	0.2258	2.64e-08	-0.0545	0.0098	T	C	0.1836	1.9e-13	-0.12385	0.016838	A2	MAPT	yes
rs62063275	17	44036287	A	G	0.7742	2.49e-08	0.0546	0.0098	G	A	0.1837	1.7e-13	-0.12414	0.016842	A2	MAPT	yes
rs62063276	17	44036408	T	G	0.7733	3.71e-08	0.0539	0.0098	G	T	0.1804	2.38e-13	-0.12325	0.016826	A2	MAPT	yes
rs62063277	17	44036462	A	T	0.2258	2.81e-08	-0.0544	0.0098	A	T	0.1837	1.26e-13	-0.12475	0.016835	A2	MAPT	yes
rs17650818	17	44036787	T	C	0.7741	2.86e-08	0.0543	0.0098	C	T	0.182	1.03e-11	-0.12155	0.017868	A2	MAPT	yes
rs62063278	17	44036914	T	C	0.2254	3.25e-08	-0.0542	0.0098	T	C	0.1831	1.78e-13	-0.1239	0.016824	A2	MAPT	yes
rs113793114	17	44037079	A	G	0.2259	4.39e-08	-0.0536	0.0098	A	G	0.1838	1.3e-13	-0.12464	0.016829	A2	MAPT	yes
rs62063280	17	44037299	C	G	0.2255	2.85e-08	-0.0544	0.0098	C	G	0.1834	1.13e-13	-0.12505	0.016843	A2	MAPT	yes
rs17650842	17	44037491	A	G	0.7742	2.55e-08	0.0545	0.0098	G	A	0.1819	6.97e-12	-0.12259	0.017875	A2	MAPT	yes
rs62063282	17	44039043	A	G	0.2253	2.37e-08	-0.0547	0.0098	A	G	0.1834	1.23e-13	-0.12492	0.016849	A2	MAPT	yes
rs111520035	17	44039410	A	G	0.7744	2.78e-08	0.0544	0.0098	G	A	0.1835	1.15e-13	-0.12479	0.016813	A2	MAPT	yes
rs17650872	17	44039516	T	G	0.2256	2.79e-08	-0.0544	0.0098	T	G	0.1818	6.41e-12	-0.12268	0.017857	A2	MAPT	yes
rs55780945	17	44040120	T	C	0.2256	2.89e-08	-0.0543	0.0098	T	C	0.1835	2.07e-13	-0.12356	0.016824	A2	MAPT	yes
rs55711941	17	44040823	T	C	0.2256	2.82e-08	-0.0544	0.0098	T	C	0.1835	1.78e-13	-0.12388	0.016823	A2	MAPT	yes
rs55709241	17	44041101	T	C	0.7753	1.64e-08	0.0554	0.0098	C	T	0.1822	1.38e-13	-0.12467	0.016851	A2	MAPT	yes
rs56280951	17	44041107	A	G	0.2247	1.8e-08	-0.0553	0.0098	A	G	0.1822	1.89e-13	-0.12399	0.016855	A2	MAPT	yes
rs62063291	17	44043378	T	C	0.7743	2.24e-08	0.0547	0.0098	C	T	0.1836	1.27e-13	-0.1246	0.016817	A2	MAPT	yes
rs62063292	17	44043636	T	C	0.2256	2.86e-08	-0.0543	0.0098	T	C	0.1835	1.11e-13	-0.12488	0.016812	A2	MAPT	yes
rs62063293	17	44043819	A	G	0.2256	2.93e-08	-0.0543	0.0098	A	G	0.1835	1.41e-13	-0.12439	0.016819	A2	MAPT	yes
rs17650973	17	44044220	A	T	0.7743	2.6e-08	0.0545	0.0098	T	A	0.1904	1.23e-13	-0.12462	0.016811	A2	MAPT	yes
rs62063295	17	44044431	T	C	0.2255	2.67e-08	-0.0545	0.0098	T	C	0.1835	1.3e-13	-0.12454	0.016815	A2	MAPT	yes
rs17650991	17	44044508	A	C	0.7744	2.87e-08	0.0543	0.0098	C	A	0.1835	1.1e-13	-0.12489	0.016814	A2	MAPT	yes
rs75145092	17	44044823	A	T	0.2256	2.97e-08	-0.0543	0.0098	A	T	0.1835	1.38e-13	-0.12438	0.016811	A2	MAPT	yes
rs113857334	17	44044940	T	C	0.7744	2.83e-08	0.0544	0.0098	C	T	0.1835	1.35e-13	-0.12446	0.016817	A2	MAPT	yes
rs17572147	17	44044985	A	G	0.7745	2.85e-08	0.0543	0.0098	G	A	0.1817	4.1e-12	-0.12388	0.017867	A2	MAPT	yes
rs77513497	17	44045474	A	G	0.7744	2.88e-08	0.0543	0.0098	G	A	0.1835	1.09e-13	-0.12492	0.016815	A2	MAPT	yes
rs62063296	17	44046202	T	C	0.2256	2.93e-08	-0.0543	0.0098	T	C	0.1836	9.4e-14	-0.12525	0.016814	A2	MAPT	yes
rs62641967	17	44047216	T	G	0.7746	2.93e-08	0.0543	0.0098	G	T	0.1835	1.14e-13	-0.12487	0.016821	A2	MAPT	yes
rs74373419	17	44047609	T	C	0.2256	2.85e-08	-0.0543	0.0098	T	C	0.1835	1.19e-13	-0.12472	0.016812	A2	MAPT	yes
rs62063297	17	44047802	A	T	0.7744	2.86e-08	0.0543	0.0098	T	A	0.1905	1.11e-13	-0.12488	0.016814	A2	MAPT	yes
rs62063298	17	44048323	T	G	0.2248	4.22e-08	-0.0538	0.0098	T	G	0.1825	2.09e-13	-0.12367	0.016842	A2	MAPT	yes
rs62063300	17	44048350	T	C	0.7752	3.96e-08	0.0539	0.0098	C	T	0.1825	1.43e-13	-0.12447	0.016835	A2	MAPT	yes
rs62063303	17	44049133	T	C	0.7745	2.94e-08	0.0543	0.0098	C	T	0.1835	1.46e-13	-0.12429	0.016818	A2	MAPT	yes
rs75242405	17	44049329	T	C	0.2256	2.87e-08	-0.0543	0.0098	T	C	0.1835	1.57e-13	-0.12413	0.016817	A2	MAPT	yes
rs17572248	17	44049867	A	G	0.7743	2.94e-08	0.0543	0.0098	G	A	0.1836	1.2e-13	-0.12471	0.016814	A2	MAPT	yes
rs62063304	17	44049900	A	G	0.7746	2.98e-08	0.0543	0.0098	G	A	0.1835	1.01e-13	-0.12513	0.016821	A2	MAPT	yes
rs62063305	17	44050282	A	G	0.2256	2.83e-08	-0.0544	0.0098	A	G	0.1835	1.29e-13	-0.12456	0.016815	A2	MAPT	yes
rs17651134	17	44050340	A	G	0.2257	2.83e-08	-0.0543	0.0098	A	G	0.1835	1.56e-13	-0.12416	0.016818	A2	MAPT	yes
rs62063306	17	44050395	A	C	0.2256	2.88e-08	-0.0543	0.0098	A	C	0.1836	1.3e-13	-0.12453	0.016815	A2	MAPT	yes
rs62063774	17	44050463	T	C	0.7744	2.92e-08	0.0543	0.0098	C	T	0.1836	1.17e-13	-0.12477	0.016815	A2	MAPT	yes
rs62063775	17	44050823	T	G	0.2256	3.06e-08	-0.0542	0.0098	T	G	0.1835	1.27e-13	-0.12461	0.016818	A2	MAPT	yes
rs62063776	17	44050850	A	G	0.7744	3.18e-08	0.0542	0.0098	G	A	0.1835	1.17e-13	-0.12477	0.016817	A2	MAPT	yes
rs117124984	17	44051588	C	G	0.7766	3.45e-08	0.0544	0.0099	G	C	0.1875	2.78e-13	-0.12318	0.016864	A2	MAPT	yes
rs118087478	17	44051589	T	G	0.7765	3.25e-08	0.0545	0.0099	G	T	0.1806	2.67e-13	-0.12328	0.016864	A2	MAPT	yes
rs77875796	17	44051612	A	G	0.7757	2.74e-08	0.0547	0.0098	G	A	0.1818	1.42e-13	-0.12458	0.016848	A2	MAPT	yes
rs1800547	17	44051846	A	G	0.7743	2.73e-08	0.0544	0.0098	G	A	0.1835	9.29e-14	-0.12527	0.016813	A2	MAPT	yes
rs17651213	17	44051924	A	G	0.2257	2.86e-08	-0.0543	0.0098	A	G	0.1835	1.24e-13	-0.12467	0.016819	A2	MAPT	yes
rs17651243	17	44052284	A	G	0.2257	2.87e-08	-0.0543	0.0098	A	G	0.1835	1.23e-13	-0.12466	0.016816	A2	MAPT	yes
rs78104015	17	44052733	A	G	0.7744	2.88e-08	0.0543	0.0098	G	A	0.1836	9.92e-14	-0.12514	0.016815	A2	MAPT	yes
rs62063777	17	44053171	A	G	0.7744	2.93e-08	0.0543	0.0098	G	A	0.1835	9.54e-14	-0.1252	0.016812	A2	MAPT	yes
rs2217394	17	44053448	A	G	0.7743	2.84e-08	0.0543	0.0098	G	A	0.1819	6.72e-12	-0.12251	0.017849	A2	MAPT	yes
rs62063778	17	44053989	A	G	0.2256	2.83e-08	-0.0544	0.0098	A	G	0.1835	1.81e-13	-0.12384	0.016822	A2	MAPT	yes
rs17651285	17	44054237	A	G	0.2257	2.85e-08	-0.0543	0.0098	A	G	0.1835	1.44e-13	-0.12431	0.016815	A2	MAPT	yes
rs17572467	17	44054388	T	C	0.7743	2.82e-08	0.0543	0.0098	C	T	0.1835	1.07e-13	-0.12496	0.016812	A2	MAPT	yes
rs62063779	17	44054671	T	C	0.2256	2.89e-08	-0.0543	0.0098	T	C	0.1835	1.23e-13	-0.12467	0.016816	A2	MAPT	yes
rs754513	17	44055638	A	T	0.2255	2.78e-08	-0.0544	0.0098	A	T	0.1834	1.87e-13	-0.12385	0.016833	A2	MAPT	yes
rs754512	17	44055647	A	T	0.7743	2.99e-08	0.0542	0.0098	T	A	0.1904	1.95e-13	-0.12375	0.016832	A2	MAPT	yes
rs62063780	17	44056238	A	G	0.7744	3.08e-08	0.0542	0.0098	G	A	0.1835	1.17e-13	-0.12475	0.016813	A2	MAPT	yes
rs2163129	17	44056433	T	C	0.7745	3.39e-08	0.0541	0.0098	C	T	0.1835	1.56e-13	-0.12413	0.016815	A2	MAPT	yes
rs1981997	17	44056767	A	G	0.2258	2.87e-08	-0.0543	0.0098	A	G	0.1836	1.22e-13	-0.12464	0.016809	A2	MAPT	yes
rs1981998	17	44056833	A	G	0.2257	3.02e-08	-0.0542	0.0098	A	G	0.1835	1.28e-13	-0.12457	0.016815	A2	MAPT	yes
rs3785884	17	44057595	A	G	0.2306	1.32e-08	-0.0552	0.0097	A	G	0.1958	4.1e-13	-0.12128	0.016723	A2	MAPT	yes
rs17572627	17	44058629	A	T	0.2256	3.04e-08	-0.0542	0.0098	A	T	0.1835	1.45e-13	-0.12429	0.016814	A2	MAPT	yes
rs66635171	17	44058699	T	TAGG	0.224	4.68e-08	-0.0545	0.01	T	TAGG	0.178	3.48e-12	-0.12213	0.017555	A2	MAPT	yes
rs17651483	17	44058861	A	C	0.2257	2.77e-08	-0.0544	0.0098	A	C	0.1835	1.76e-13	-0.12389	0.01682	A2	MAPT	yes
rs62063783	17	44059215	T	C	0.2256	3.09e-08	-0.0542	0.0098	T	C	0.1836	2.34e-13	-0.12336	0.016834	A2	MAPT	yes
rs56234850	17	44060248	A	G	0.2257	3.25e-08	-0.0541	0.0098	A	G	0.1836	1.28e-13	-0.12458	0.016816	A2	MAPT	yes
rs63750417	17	44060775	T	C	0.2258	2.48e-08	-0.0545	0.0098	T	C	0.1835	9.95e-14	-0.12543	0.016855	A2	MAPT	yes
rs62063786	17	44061023	A	G	0.2259	3.94e-08	-0.0538	0.0098	A	G	0.1836	1.57e-13	-0.1242	0.016827	A2	MAPT	yes
rs62063787	17	44061036	T	C	0.7743	2.69e-08	0.0544	0.0098	C	T	0.1819	5.86e-12	-0.12288	0.017852	A2	MAPT	yes
rs62063788	17	44061696	T	C	0.2256	2.64e-08	-0.0545	0.0098	T	C	0.1835	1e-13	-0.1251	0.016814	A2	MAPT	yes
rs62063789	17	44061898	T	C	0.7743	3.05e-08	0.0542	0.0098	C	T	0.1838	6.46e-14	-0.1262	0.01683	A2	MAPT	yes
rs56363731	17	44062337	A	G	0.2256	2.71e-08	-0.0544	0.0098	A	G	0.1836	9.86e-14	-0.12512	0.016811	A2	MAPT	yes
rs62063790	17	44062915	T	G	0.2255	2.98e-08	-0.0543	0.0098	T	G	0.1835	1.42e-13	-0.12438	0.016821	A2	MAPT	yes
rs62063791	17	44062993	A	G	0.7745	2.62e-08	0.0545	0.0098	G	A	0.1835	7.67e-14	-0.1257	0.016814	A2	MAPT	yes
rs1529534	17	44063140	A	G	0.7745	3.75e-08	0.0539	0.0098	G	A	0.1834	1.13e-13	-0.12491	0.016824	A2	MAPT	yes
rs17572795	17	44063393	A	G	0.2257	2.83e-08	-0.0543	0.0098	A	G	0.1836	1.12e-13	-0.12485	0.016812	A2	MAPT	yes
rs17572823	17	44063563	T	C	0.7743	2.91e-08	0.0543	0.0098	C	T	0.1819	6.83e-12	-0.12247	0.017851	A2	MAPT	yes
rs9901937	17	44063723	A	C	0.7743	3.14e-08	0.0542	0.0098	C	A	0.1801	2.06e-13	-0.12395	0.016876	A2	MAPT	yes
rs17572851	17	44063766	A	G	0.7743	2.78e-08	0.0544	0.0098	G	A	0.1819	4.99e-12	-0.1233	0.017855	A2	MAPT	yes
rs62063792	17	44063787	A	G	0.7744	2.7e-08	0.0544	0.0098	G	A	0.1836	1.15e-13	-0.12479	0.016813	A2	MAPT	yes
rs17572893	17	44064208	A	G	0.2256	3.13e-08	-0.0542	0.0098	A	G	0.1835	8.67e-14	-0.12549	0.016822	A2	MAPT	yes
rs62063793	17	44064334	T	C	0.7744	3.31e-08	0.0541	0.0098	C	T	0.1833	1.04e-13	-0.12502	0.016813	A2	MAPT	yes
rs10445371	17	44065410	A	G	0.2257	2.82e-08	-0.0543	0.0098	A	G	0.1836	1.32e-13	-0.12451	0.016816	A2	MAPT	yes
rs919462	17	44065740	T	C	0.2256	2.99e-08	-0.0543	0.0098	T	C	0.1836	1.37e-13	-0.12444	0.016819	A2	MAPT	yes
rs919464	17	44065901	T	C	0.2256	2.86e-08	-0.0543	0.0098	T	C	0.1836	1.34e-13	-0.12451	0.01682	A2	MAPT	yes
rs62063794	17	44066088	A	T	0.2256	2.85e-08	-0.0543	0.0098	A	T	0.1835	1.13e-13	-0.12485	0.016814	A2	MAPT	yes
rs112385572	17	44066172	A	G	0.7744	2.84e-08	0.0544	0.0098	G	A	0.1835	1.3e-13	-0.12456	0.016819	A2	MAPT	yes
rs113134013	17	44066995	T	C	0.2256	2.88e-08	-0.0543	0.0098	T	C	0.1836	9.95e-14	-0.12516	0.016819	A2	MAPT	yes
rs76357066	17	44067046	A	G	0.2256	2.65e-08	-0.0545	0.0098	A	G	0.1835	1.46e-13	-0.1243	0.016819	A2	MAPT	yes
rs10445337	17	44067400	T	C	0.7741	2.78e-08	0.0544	0.0098	C	T	0.1837	1.1e-13	-0.12499	0.016827	A2	MAPT	yes
rs79447161	17	44067508	A	G	0.7745	2.71e-08	0.0544	0.0098	G	A	0.1835	1.06e-13	-0.12496	0.016812	A2	MAPT	yes
rs17651754	17	44067546	T	C	0.7744	2.69e-08	0.0544	0.0098	C	T	0.1836	1.03e-13	-0.12505	0.016813	A2	MAPT	yes
rs111652694	17	44067831	T	C	0.7744	2.91e-08	0.0543	0.0098	C	T	0.1835	1.13e-13	-0.12483	0.016814	A2	MAPT	yes
rs75743061	17	44068112	C	G	0.7744	3e-08	0.0543	0.0098	G	C	0.1902	1.1e-13	-0.12492	0.016816	A2	MAPT	yes
rs62063795	17	44068238	T	C	0.2256	2.87e-08	-0.0543	0.0098	T	C	0.1836	1.35e-13	-0.12445	0.016814	A2	MAPT	yes
rs62063797	17	44068294	C	G	0.2256	2.93e-08	-0.0543	0.0098	C	G	0.1836	2.07e-13	-0.12357	0.016824	A2	MAPT	yes
rs76618565	17	44068481	A	G	0.2255	2.92e-08	-0.0543	0.0098	A	G	0.1835	1.24e-13	-0.12465	0.016816	A2	MAPT	yes
rs62063798	17	44068543	A	G	0.2256	2.84e-08	-0.0544	0.0098	A	G	0.1836	1.37e-13	-0.12442	0.016816	A2	MAPT	yes
rs17651857	17	44069687	A	G	0.7744	3.08e-08	0.0542	0.0098	G	A	0.1819	7.66e-12	-0.12221	0.017855	A2	MAPT	yes
rs74759276	17	44069768	A	G	0.7744	3.14e-08	0.0542	0.0098	G	A	0.1836	1.48e-13	-0.12426	0.016816	A2	MAPT	yes
rs17651887	17	44069840	A	G	0.2256	2.99e-08	-0.0543	0.0098	A	G	0.1835	1.77e-13	-0.12386	0.016817	A2	MAPT	yes
rs78599197	17	44069970	C	G	0.7744	3.11e-08	0.0542	0.0098	G	C	0.1905	1.51e-13	-0.12418	0.016812	A2	MAPT	yes
rs62063842	17	44070111	C	G	0.2256	3.14e-08	-0.0542	0.0098	C	G	0.1836	1.76e-13	-0.12389	0.016818	A2	MAPT	yes
rs55662347	17	44070545	A	G	0.2256	3.1e-08	-0.0542	0.0098	A	G	0.1835	1.53e-13	-0.12418	0.016817	A2	MAPT	yes
rs55913645	17	44070956	A	T	0.2256	3.21e-08	-0.0541	0.0098	A	T	0.1836	1.62e-13	-0.12406	0.016817	A2	MAPT	yes
rs17573175	17	44071089	C	G	0.7744	3.15e-08	0.0542	0.0098	G	C	0.1905	1.47e-13	-0.12424	0.016813	A2	MAPT	yes
rs62063845	17	44071294	T	C	0.7743	3.03e-08	0.0542	0.0098	C	T	0.1835	1.72e-13	-0.12394	0.01682	A2	MAPT	yes
rs62063846	17	44071674	A	G	0.7745	3.02e-08	0.0543	0.0098	G	A	0.1835	1.45e-13	-0.12431	0.016817	A2	MAPT	yes
rs55886080	17	44072041	A	T	0.2256	3.09e-08	-0.0542	0.0098	A	T	0.1835	1.77e-13	-0.12388	0.016819	A2	MAPT	yes
rs75944932	17	44072423	A	C	0.7745	2.69e-08	0.0545	0.0098	C	A	0.2274	3.56e-13	-0.12293	0.016906	A2	MAPT	yes
rs17573245	17	44072854	T	C	0.7743	2.7e-08	0.0545	0.0098	C	T	0.1836	1.7e-13	-0.12401	0.016826	A2	MAPT	yes
rs17573266	17	44072881	C	G	0.7742	3.54e-08	0.054	0.0098	G	C	0.1906	1.07e-13	-0.12506	0.016827	A2	MAPT	yes
rs112572874	17	44072984	A	G	0.773	4.85e-08	0.0534	0.0098	G	A	0.1853	6.66e-14	-0.126	0.016813	A2	MAPT	yes
rs17652036	17	44073027	A	G	0.2255	2.71e-08	-0.0545	0.0098	A	G	0.1835	1.27e-13	-0.12462	0.016821	A2	MAPT	yes
rs62063849	17	44073062	T	G	0.7743	2.89e-08	0.0543	0.0098	G	T	0.1837	1.08e-13	-0.1251	0.016834	A2	MAPT	yes
rs17652066	17	44073145	C	G	0.2254	2.96e-08	-0.0543	0.0098	C	G	0.1833	1.85e-13	-0.12382	0.016825	A2	MAPT	yes
rs62063850	17	44073739	A	G	0.2256	3.03e-08	-0.0542	0.0098	A	G	0.1835	2.26e-13	-0.12336	0.016824	A2	MAPT	yes
rs17652121	17	44073973	T	C	0.7743	3.08e-08	0.0542	0.0098	C	T	0.1835	1.11e-13	-0.1249	0.016816	A2	MAPT	yes
rs62063851	17	44074435	C	G	0.7744	3.34e-08	0.0541	0.0098	G	C	0.1905	1.49e-13	-0.12439	0.016835	A2	MAPT	yes
rs62063852	17	44074581	A	G	0.7745	3.75e-08	0.0539	0.0098	G	A	0.1836	1.15e-13	-0.12481	0.016815	A2	MAPT	yes
rs62063853	17	44074613	A	G	0.7749	2.2e-08	0.0549	0.0098	G	A	0.1831	1.19e-13	-0.12481	0.016825	A2	MAPT	yes
rs62063854	17	44074619	A	G	0.2251	2.2e-08	-0.0549	0.0098	A	G	0.183	1.61e-13	-0.12415	0.016826	A2	MAPT	yes
rs2004673	17	44075099	T	C	0.7746	2.32e-08	0.0548	0.0098	C	T	0.1834	1.18e-13	-0.1248	0.016822	A2	MAPT	yes
rs2004674	17	44075110	A	T	0.7746	2.32e-08	0.0548	0.0098	T	A	0.1903	1.51e-13	-0.12429	0.016827	A2	MAPT	yes
rs1078268	17	44075901	A	G	0.7745	2.66e-08	0.0545	0.0098	G	A	0.1835	3.08e-13	-0.1229	0.016856	A2	MAPT	yes
rs62063856	17	44076466	A	G	0.7745	2.35e-08	0.0547	0.0098	G	A	0.1835	1.08e-13	-0.12508	0.016834	A2	MAPT	yes
rs62063857	17	44076665	A	G	0.7743	2.17e-08	0.0548	0.0098	G	A	0.1837	1.65e-13	-0.12415	0.016835	A2	STH	yes
rs79959255	17	44077708	T	G	0.2256	2.24e-08	-0.0548	0.0098	T	G	0.1836	1.49e-13	-0.12438	0.016835	A2	MAPT	yes
rs56108300	17	44077851	A	T	0.2246	1.52e-08	-0.0556	0.0098	A	T	0.1824	1.11e-13	-0.12508	0.016841	A2	MAPT	yes
rs62063859	17	44078616	A	G	0.2255	2.15e-08	-0.0549	0.0098	A	G	0.1836	1.68e-13	-0.1241	0.016834	A2	MAPT	yes
rs62064660	17	44078832	A	G	0.2255	2.24e-08	-0.0548	0.0098	A	G	0.1835	1.63e-13	-0.12417	0.016835	A2	MAPT	yes
rs62064661	17	44078892	A	G	0.2255	2.36e-08	-0.0547	0.0098	A	G	0.1835	1.47e-13	-0.1244	0.016835	A2	MAPT	yes
rs17573447	17	44079567	T	C	0.2256	2.8e-08	-0.0544	0.0098	T	C	0.1836	2.43e-13	-0.12311	0.016812	A2	MAPT	yes
rs62064662	17	44079721	A	G	0.7745	2.22e-08	0.0548	0.0098	G	A	0.1836	1.59e-13	-0.12408	0.016815	A2	MAPT	yes
rs62064663	17	44080039	T	G	0.7743	2.03e-08	0.055	0.0098	G	T	0.1838	6.53e-14	-0.1263	0.016847	A2	MAPT	yes
rs113894932	17	44080408	C	G	0.2255	2.87e-08	-0.0544	0.0098	C	G	0.18	2.43e-13	-0.12346	0.01686	A2	MAPT	yes
rs8070723	17	44081064	A	G	0.7728	1.97e-08	0.0548	0.0098	G	A	0.184	1.4e-13	-0.1242	0.016791	A2	MAPT	yes
rs62064664	17	44081462	T	C	0.7745	2.11e-08	0.0549	0.0098	C	T	0.1835	1.33e-13	-0.12469	0.016842	A2	MAPT	yes
rs62064665	17	44081527	T	C	0.7745	2.19e-08	0.0548	0.0098	C	T	0.1835	1.45e-13	-0.12449	0.016841	A2	MAPT	yes
rs111324579	17	44082181	A	G	0.7745	2.35e-08	0.0547	0.0098	G	A	0.1836	1.17e-13	-0.12491	0.016834	A2	MAPT	yes
rs113201171	17	44082249	A	T	0.7746	1.69e-08	0.0553	0.0098	T	A	0.1905	1.83e-13	-0.12402	0.016848	A2	MAPT	yes
rs62064666	17	44082514	T	C	0.7746	1.99e-08	0.055	0.0098	C	T	0.1834	1.79e-13	-0.124	0.016838	A2	MAPT	yes
rs62064667	17	44082528	A	T	0.7743	3.28e-08	0.0542	0.0098	T	A	0.1906	6.79e-13	-0.1212	0.016872	A2	MAPT	yes
rs17573593	17	44082603	A	C	0.7745	2.1e-08	0.0549	0.0098	C	A	0.1835	1.61e-13	-0.1242	0.016835	A2	MAPT	yes
rs17573607	17	44083081	A	G	0.2251	2.76e-08	-0.0545	0.0098	A	G	0.1833	1.9e-13	-0.12399	0.016857	A2	MAPT	yes
rs17652337	17	44083323	T	C	0.2264	3.56e-08	-0.0541	0.0098	T	C	0.1828	2.24e-11	-0.11956	0.017874	A2	MAPT	yes
rs1991556	17	44083402	A	G	0.2264	2.66e-08	-0.0549	0.0099	A	G	0.1857	2.66e-11	-0.11923	0.017891	A2	MAPT	yes
rs74829364	17	44084533	T	C	0.7745	2.12e-08	0.0549	0.0098	C	T	0.2273	3.25e-13	-0.12311	0.016902	A2	MAPT	yes
rs62064669	17	44084676	T	C	0.2255	2.11e-08	-0.0549	0.0098	T	C	0.1835	2.48e-13	-0.12329	0.016844	A2	MAPT	yes
rs78962882	17	44084844	C	G	0.2255	2.14e-08	-0.0549	0.0098	C	G	0.1835	1.55e-13	-0.12429	0.016835	A2	MAPT	yes
rs62064671	17	44086100	T	C	0.7745	2.08e-08	0.0549	0.0098	C	T	0.1835	1.92e-13	-0.1238	0.016834	A2	MAPT	yes
rs62064672	17	44086521	A	G	0.2255	2.06e-08	-0.0549	0.0098	A	G	0.1835	2.23e-13	-0.12349	0.016838	A2	MAPT	yes
rs62064674	17	44088772	A	C	0.2255	2.05e-08	-0.055	0.0098	A	C	0.1835	1.68e-13	-0.12411	0.016836	A2	MAPT	yes
rs62064675	17	44088926	T	C	0.2256	1.86e-08	-0.0551	0.0098	T	C	0.1836	1.19e-13	-0.1251	0.016864	A2	MAPT	yes
rs76723223	17	44089108	T	C	0.7745	2.01e-08	0.055	0.0098	C	T	0.1835	1.41e-13	-0.12464	0.016855	A2	MAPT	yes
rs733966	17	44089563	T	C	0.2255	2e-08	-0.055	0.0098	T	C	0.1835	2.12e-13	-0.12376	0.016858	A2	MAPT	yes
rs733969	17	44089727	A	G	0.2256	2.34e-08	-0.0547	0.0098	A	G	0.1835	2.65e-13	-0.12325	0.016858	A2	MAPT	yes
rs4283261	17	44089921	T	C	0.2254	1.93e-08	-0.0551	0.0098	T	C	0.1835	2.37e-13	-0.12354	0.016864	A2	MAPT	yes
rs747152	17	44090339	T	C	0.7745	2.01e-08	0.055	0.0098	C	T	0.1835	1.18e-13	-0.12502	0.016851	A2	MAPT	yes
rs12150254	17	44090455	T	C	0.7746	2.02e-08	0.055	0.0098	C	T	0.1818	7.38e-12	-0.12259	0.017897	A2	MAPT	yes
rs12150506	17	44090536	A	G	0.2255	2.3e-08	-0.0548	0.0098	A	G	0.1835	2.25e-13	-0.12364	0.016861	A2	MAPT	yes
rs12150170	17	44090646	A	G	0.7745	2.07e-08	0.0549	0.0098	G	A	0.1835	1.54e-13	-0.12448	0.016859	A2	MAPT	yes
rs12150515	17	44090685	T	G	0.2255	2.01e-08	-0.055	0.0098	T	G	0.1835	1.78e-13	-0.12416	0.01686	A2	MAPT	yes
rs62062266	17	44090704	A	G	0.7745	2.05e-08	0.0549	0.0098	G	A	0.1835	2.11e-13	-0.12381	0.016864	A2	MAPT	yes
rs17573858	17	44090796	T	C	0.7745	2.01e-08	0.055	0.0098	C	T	0.1835	1.26e-13	-0.12486	0.01685	A2	MAPT	yes
rs62062267	17	44090854	T	C	0.2255	1.78e-08	-0.0552	0.0098	T	C	0.1835	1.39e-13	-0.1247	0.016857	A2	MAPT	yes
rs62062268	17	44090858	T	C	0.2254	1.9e-08	-0.0551	0.0098	T	C	0.1835	1.76e-13	-0.12416	0.016856	A2	MAPT	yes
rs62062269	17	44091092	C	G	0.2255	2.03e-08	-0.055	0.0098	C	G	0.1835	1.56e-13	-0.12441	0.016854	A2	MAPT	yes
rs62062270	17	44091195	T	C	0.7745	1.99e-08	0.055	0.0098	C	T	0.1835	1.37e-13	-0.12469	0.016852	A2	MAPT	yes
rs75534191	17	44091724	A	G	0.2255	2.02e-08	-0.055	0.0098	A	G	0.1835	1.35e-13	-0.12472	0.016852	A2	MAPT	yes
rs9891103	17	44091886	T	C	0.2331	4.04e-08	-0.0533	0.0097	T	C	0.1876	6.1e-14	-0.12543	0.01671	A2	MAPT	yes
rs62062271	17	44091988	T	C	0.7672	1.22e-08	0.056	0.0098	C	T	0.1965	3.83e-11	-0.11493	0.017386	A2	MAPT	yes
rs12149995	17	44092801	A	G	0.2257	1.59e-08	-0.0554	0.0098	A	G	0.1837	2.96e-13	-0.12284	0.016836	A2	MAPT	yes
rs62062274	17	44093319	A	G	0.2255	2.05e-08	-0.0549	0.0098	A	G	0.1835	1.09e-13	-0.12509	0.016837	A2	MAPT	yes
rs62062275	17	44093496	A	G	0.7745	2.04e-08	0.055	0.0098	G	A	0.1835	1.54e-13	-0.12431	0.016836	A2	MAPT	yes
rs62062276	17	44093627	A	G	0.7746	2.05e-08	0.055	0.0098	G	A	0.1835	1.39e-13	-0.12457	0.016841	A2	MAPT	yes
rs62062278	17	44093860	A	G	0.7746	2.23e-08	0.0548	0.0098	G	A	0.1835	1.12e-13	-0.125	0.016834	A2	MAPT	yes
rs62062281	17	44094112	A	G	0.7745	2.16e-08	0.0549	0.0098	G	A	0.1835	1.91e-13	-0.12387	0.016842	A2	MAPT	yes
rs62062282	17	44094374	A	G	0.7745	2.03e-08	0.055	0.0098	G	A	0.1835	1.46e-13	-0.12442	0.016835	A2	MAPT	yes
rs17652502	17	44094471	A	G	0.2255	1.96e-08	-0.055	0.0098	A	G	0.1835	2.39e-13	-0.12338	0.016845	A2	MAPT	yes
rs2316948	17	44094667	C	G	0.7746	2.08e-08	0.0549	0.0098	G	C	0.1905	1.96e-13	-0.12381	0.016841	A2	MAPT	yes
rs62062284	17	44095570	A	G	0.2255	1.91e-08	-0.0551	0.0098	A	G	0.1835	1.57e-13	-0.12426	0.016836	A2	MAPT	yes
rs62062285	17	44095661	T	G	0.7745	2.09e-08	0.0549	0.0098	G	T	0.1835	1.4e-13	-0.12451	0.016834	A2	MAPT	yes
rs62062286	17	44096486	T	C	0.2257	2.23e-08	-0.0549	0.0098	T	C	0.1837	1.31e-13	-0.12477	0.016849	A2	MAPT	yes
rs62062288	17	44096553	A	G	0.2185	1.86e-08	-0.0563	0.01	A	G	0.1738	2.01e-12	-0.12755	0.018134	A2	MAPT	yes
rs78590209	17	44098862	A	G	0.7748	1.93e-08	0.0551	0.0098	G	A	0.1834	1.85e-13	-0.12404	0.016855	A2	MAPT	yes
rs17652520	17	44098967	A	G	0.229	1.23e-08	-0.0558	0.0098	A	G	0.1885	8.8e-13	-0.11992	0.016777	A2	MAPT	yes
rs17573907	17	44099082	T	C	0.2253	2.28e-08	-0.0548	0.0098	T	C	0.1818	7.7e-12	-0.12252	0.017902	A2	MAPT	yes
rs62062290	17	44099129	A	C	0.2251	2.47e-08	-0.0547	0.0098	A	C	0.1834	1.27e-13	-0.12486	0.016852	A2	MAPT	yes
rs62062292	17	44099809	A	C	0.7748	2.15e-08	0.0549	0.0098	C	A	0.1835	1.48e-13	-0.12442	0.016838	A2	MAPT	yes
rs62062293	17	44100553	A	C	0.2252	2.32e-08	-0.0548	0.0098	A	C	0.1835	1.27e-13	-0.12478	0.016841	A2	MAPT	yes
rs62062294	17	44100666	A	C	0.7748	2.17e-08	0.0549	0.0098	C	A	0.1835	1.84e-13	-0.12396	0.016844	A2	MAPT	yes
rs62062295	17	44100906	A	G	0.7747	2.22e-08	0.0549	0.0098	G	A	0.1835	1.72e-13	-0.12411	0.016843	A2	MAPT	yes
rs62062296	17	44100916	T	C	0.2252	2.04e-08	-0.055	0.0098	T	C	0.1835	2.82e-13	-0.12305	0.01685	A2	MAPT	yes
rs62062297	17	44101004	A	G	0.7748	2.17e-08	0.0549	0.0098	G	A	0.1835	1.6e-13	-0.12427	0.016842	A2	MAPT	yes
rs9468	17	44101563	T	C	0.7744	2.04e-08	0.055	0.0098	C	T	0.1882	4.47e-13	-0.12194	0.016841	A2	MAPT	yes
rs1052587	17	44102604	T	C	0.7747	2.04e-08	0.055	0.0098	C	T	0.1835	9.31e-14	-0.12527	0.016814	A2	MAPT	yes
rs1052590	17	44102638	A	G	0.7748	2.2e-08	0.0549	0.0098	G	A	0.1834	1.75e-13	-0.12413	0.016849	A2	MAPT	yes
rs1052594	17	44102689	C	G	0.2252	2.16e-08	-0.0549	0.0098	C	G	0.1835	2.07e-13	-0.12375	0.01685	A2	MAPT	yes
rs17574040	17	44102865	A	C	0.7747	1.87e-08	0.0552	0.0098	C	A	0.1835	1.12e-13	-0.12507	0.016843	A2	MAPT	yes
rs7687	17	44103296	T	C	0.7748	2.22e-08	0.0549	0.0098	C	T	0.1834	2.16e-13	-0.12375	0.016863	A2	MAPT	yes
rs17652748	17	44103616	T	C	0.2252	2.32e-08	-0.0548	0.0098	T	C	0.1818	7.31e-12	-0.12261	0.017895	A2	MAPT	yes
rs75010486	17	44103825	T	C	0.7759	1.78e-08	0.0555	0.0098	C	T	0.182	1.14e-13	-0.12523	0.016871	A2	MAPT	yes
rs16940806	17	44103826	A	G	0.2241	1.78e-08	-0.0555	0.0098	A	G	0.1819	1.53e-13	-0.1246	0.016874	A2	MAPT	yes
rs2158257	17	44104343	A	C	0.7748	2.16e-08	0.0549	0.0098	C	A	0.1835	1.35e-13	-0.12463	0.016839	A2	MAPT	yes
rs17574228	17	44104509	T	C	0.7748	2.16e-08	0.0549	0.0098	C	T	0.1835	1.23e-13	-0.12481	0.016835	A2	MAPT	yes
rs78681971	17	44106219	T	C	0.2252	2.06e-08	-0.055	0.0098	T	C	0.1834	2.32e-13	-0.1235	0.016852	A2	MAPT	yes
rs79772576	17	44106220	A	G	0.7745	2.47e-08	0.0547	0.0098	G	A	0.1836	3.07e-13	-0.1229	0.016855	A2	MAPT	yes
rs78229689	17	44106806	A	G	0.2253	2.78e-08	-0.0545	0.0098	A	G	0.2273	4.83e-13	-0.12229	0.016914	A2	KANSL1	yes
rs7350928	17	44108100	T	C	0.2253	1.9e-08	-0.0551	0.0098	T	C	0.1835	2.18e-13	-0.12371	0.01686	A2	KANSL1	yes
rs17574361	17	44108202	A	G	0.7748	2.16e-08	0.0549	0.0098	G	A	0.1818	7.66e-12	-0.12243	0.017887	A2	KANSL1	yes
rs17652961	17	44108355	A	G	0.2252	2.1e-08	-0.055	0.0098	A	G	0.1835	1.44e-13	-0.12451	0.016842	A2	KANSL1	yes
rs55881134	17	44109248	A	G	0.2252	2.14e-08	-0.0549	0.0098	A	G	0.1835	1.81e-13	-0.12401	0.016845	A2	KANSL1	yes
rs7350980	17	44110271	A	G	0.2319	4.85e-08	-0.0531	0.0097	A	G	0.1867	1.57e-13	-0.12352	0.016734	A2	KANSL1	yes
rs36076725	17	44110532	A	G	0.2254	1.93e-08	-0.0551	0.0098	A	G	0.1835	2.56e-13	-0.12328	0.016851	A2	KANSL1	yes
rs35833914	17	44110541	A	G	0.2254	1.96e-08	-0.055	0.0098	A	G	0.1835	3.06e-13	-0.1229	0.016854	A2	KANSL1	yes
rs4597358	17	44110670	C	G	0.7681	4.84e-08	0.0531	0.0097	G	C	0.1934	6.43e-14	-0.12546	0.01673	A2	KANSL1	yes
rs77009866	17	44110888	A	T	0.7748	2.12e-08	0.055	0.0098	T	A	0.1905	1.61e-13	-0.12427	0.016844	A2	KANSL1	yes
rs62062321	17	44111109	A	G	0.7748	2.15e-08	0.0549	0.0098	G	A	0.1835	1.62e-13	-0.12424	0.016841	A2	KANSL1	yes
rs17574604	17	44111613	A	G	0.7746	1.95e-08	0.055	0.0098	G	A	0.1835	1.41e-13	-0.1246	0.016849	A2	KANSL1	yes
rs17653162	17	44111827	A	C	0.2252	2.19e-08	-0.0549	0.0098	A	C	0.1835	1.99e-13	-0.12381	0.016845	A2	KANSL1	yes
rs62062322	17	44112385	A	G	0.7748	2.13e-08	0.0549	0.0098	G	A	0.1835	2.06e-13	-0.12371	0.016843	A2	KANSL1	yes
rs17653193	17	44112441	A	G	0.2252	2.13e-08	-0.0549	0.0098	A	G	0.1835	1.89e-13	-0.1239	0.016842	A2	KANSL1	yes
rs17653211	17	44112638	T	C	0.7748	2.1e-08	0.055	0.0098	C	T	0.1818	8.39e-12	-0.12218	0.017884	A2	KANSL1	yes
rs17653255	17	44112743	A	C	0.2252	2.13e-08	-0.0549	0.0098	A	C	0.1835	1.53e-13	-0.12437	0.016842	A2	KANSL1	yes
rs4608377	17	44113359	T	C	0.7748	2.13e-08	0.0549	0.0098	C	T	0.1835	1.79e-13	-0.12405	0.016847	A2	KANSL1	yes
rs12185225	17	44113491	T	C	0.7748	2.15e-08	0.0549	0.0098	C	T	0.1835	1.35e-13	-0.12464	0.016841	A2	KANSL1	yes
rs12150438	17	44113963	T	C	0.2252	2.17e-08	-0.0549	0.0098	T	C	0.1835	1.61e-13	-0.12425	0.016841	A2	KANSL1	yes
rs12150162	17	44114218	T	C	0.7748	2.19e-08	0.0549	0.0098	C	T	0.1835	1.78e-13	-0.12404	0.016843	A2	KANSL1	yes
rs62062134	17	44114432	A	C	0.7748	2.26e-08	0.0548	0.0098	C	A	0.1835	1.57e-13	-0.12434	0.016845	A2	KANSL1	yes
rs17574796	17	44115074	T	C	0.7748	2.46e-08	0.0547	0.0098	C	T	0.1835	1.71e-13	-0.12412	0.016841	A2	KANSL1	yes
rs17574824	17	44115107	T	C	0.2253	2.22e-08	-0.0549	0.0098	T	C	0.1835	1.44e-13	-0.1245	0.016841	A2	KANSL1	yes
rs12185243	17	44115351	T	C	0.775	2.35e-08	0.0548	0.0098	C	T	0.1817	6.39e-12	-0.12295	0.017895	A2	KANSL1	yes
rs11079729	17	44115569	A	C	0.2252	2.22e-08	-0.0549	0.0098	A	C	0.1835	1.92e-13	-0.12392	0.01685	A2	KANSL1	yes
rs12150542	17	44115730	A	G	0.2252	2.26e-08	-0.0548	0.0098	A	G	0.1835	1.61e-13	-0.12426	0.016841	A2	KANSL1	yes
rs41437445	17	44116238	A	G	0.2252	2.21e-08	-0.0549	0.0098	A	G	0.1835	1.5e-13	-0.12441	0.016842	A2	KANSL1	yes
rs62062136	17	44116312	T	C	0.7748	2.12e-08	0.055	0.0098	C	T	0.1835	1.35e-13	-0.12461	0.016837	A2	KANSL1	yes
rs34043286	17	44117119	A	G	0.7746	2.11e-08	0.0549	0.0098	G	A	0.1835	1.63e-13	-0.12427	0.016847	A2	KANSL1	yes
rs10514897	17	44117397	A	G	0.7748	2.28e-08	0.0548	0.0098	G	A	0.1835	1.85e-13	-0.12397	0.016846	A2	KANSL1	yes
rs62062137	17	44118848	A	G	0.2252	1.78e-08	-0.0553	0.0098	A	G	0.1833	1.47e-13	-0.12453	0.016852	A2	KANSL1	yes
rs41382552	17	44118999	A	G	0.7748	2.43e-08	0.0547	0.0098	G	A	0.1835	1.8e-13	-0.12403	0.016845	A2	KANSL1	yes
rs10514898	17	44119636	A	C	0.7748	2.21e-08	0.0549	0.0098	C	A	0.1835	1.58e-13	-0.12431	0.016844	A2	KANSL1	yes
rs41374248	17	44120442	A	G	0.7748	2.3e-08	0.0548	0.0098	G	A	0.1835	1.29e-13	-0.12478	0.016844	A2	KANSL1	yes
rs79252344	17	44120608	A	G	0.7748	2.13e-08	0.0549	0.0098	G	A	0.1835	1.96e-13	-0.12382	0.016842	A2	KANSL1	yes
rs62063668	17	44122484	T	C	0.2252	2.59e-08	-0.0546	0.0098	T	C	0.1835	2.32e-13	-0.12352	0.016853	A2	KANSL1	yes
rs62063670	17	44123248	T	C	0.7748	2.46e-08	0.0547	0.0098	C	T	0.1835	2.97e-13	-0.12293	0.016849	A2	KANSL1	yes
rs74571696	17	44123685	A	G	0.2252	2.46e-08	-0.0547	0.0098	A	G	0.1836	2.7e-13	-0.12314	0.016849	A2	KANSL1	yes
rs79698033	17	44123717	T	C	0.2252	2.54e-08	-0.0547	0.0098	T	C	0.1835	2.94e-13	-0.12298	0.016854	A2	KANSL1	yes
rs79065019	17	44124535	T	C	0.7746	1.75e-08	0.0553	0.0098	C	T	0.1836	1.34e-13	-0.12472	0.016849	A2	KANSL1	yes
rs112578465	17	44125066	T	C	0.2252	2.73e-08	-0.0545	0.0098	T	C	0.1835	2.02e-13	-0.12381	0.016851	A2	KANSL1	yes
rs12150336	17	44125704	T	C	0.2251	2.62e-08	-0.0546	0.0098	T	C	0.1834	3.01e-13	-0.12309	0.016876	A2	KANSL1	yes
rs12150570	17	44126218	A	G	0.2252	2.84e-08	-0.0545	0.0098	A	G	0.1835	1.66e-13	-0.12418	0.016842	A2	KANSL1	yes
rs7218319	17	44126365	T	C	0.2319	4.79e-08	-0.0531	0.0097	T	C	0.1865	8.07e-14	-0.12503	0.016739	A2	KANSL1	yes
rs74977736	17	44126977	C	G	0.2251	2.77e-08	-0.0545	0.0098	C	G	0.1834	2.71e-13	-0.12322	0.016861	A2	KANSL1	yes
rs17653836	17	44128876	A	T	0.2253	2.4e-08	-0.0547	0.0098	A	T	0.1835	1.51e-13	-0.1244	0.016843	A2	KANSL1	yes
rs17575423	17	44129253	T	C	0.7747	2.36e-08	0.0548	0.0098	C	T	0.1835	1.55e-13	-0.12434	0.016841	A2	KANSL1	yes
rs62063677	17	44129885	T	C	0.2252	2.41e-08	-0.0547	0.0098	T	C	0.1834	1.6e-13	-0.12431	0.016848	A2	KANSL1	yes
rs62063678	17	44129949	C	G	0.7747	2.87e-08	0.0544	0.0098	G	C	0.1876	1.81e-13	-0.12411	0.016859	A2	KANSL1	yes
rs79649865	17	44130587	T	G	0.7748	2.29e-08	0.0548	0.0098	G	T	0.1835	2.11e-13	-0.12378	0.01686	A2	KANSL1	yes
rs111853996	17	44130878	A	G	0.7748	2.46e-08	0.0547	0.0098	G	A	0.1834	1.77e-13	-0.12415	0.016856	A2	KANSL1	yes
rs112074397	17	44131022	T	C	0.7748	2.38e-08	0.0548	0.0098	C	T	0.1835	1.72e-13	-0.12416	0.016849	A2	KANSL1	yes
rs62063681	17	44131592	A	G	0.7748	2.39e-08	0.0548	0.0098	G	A	0.1835	1.43e-13	-0.12454	0.016845	A2	KANSL1	yes
rs62063682	17	44131622	A	G	0.2252	2.64e-08	-0.0546	0.0098	A	G	0.1834	1.06e-13	-0.12523	0.016847	A2	KANSL1	yes
rs62063683	17	44131717	A	G	0.2251	2.35e-08	-0.0548	0.0098	A	G	0.1835	1.73e-13	-0.12413	0.016846	A2	KANSL1	yes
rs79180862	17	44131798	T	C	0.2252	2.39e-08	-0.0548	0.0098	T	C	0.1835	1.4e-13	-0.12458	0.016842	A2	KANSL1	yes
rs62060760	17	44132887	T	C	0.2252	2.4e-08	-0.0547	0.0098	T	C	0.2272	3.53e-13	-0.12305	0.016919	A2	KANSL1	yes
rs17575437	17	44133031	A	T	0.2252	2.36e-08	-0.0548	0.0098	A	T	0.1835	2.16e-13	-0.12365	0.016849	A2	KANSL1	yes
rs17653889	17	44133070	A	T	0.7748	2.26e-08	0.0548	0.0098	T	A	0.1905	2.52e-13	-0.12331	0.01685	A2	KANSL1	yes
rs17653906	17	44133142	A	G	0.2252	2.21e-08	-0.0549	0.0098	A	G	0.1835	2.19e-13	-0.12375	0.016866	A2	KANSL1	yes
rs62060761	17	44133162	A	C	0.7748	2.29e-08	0.0548	0.0098	C	A	0.1834	3.14e-13	-0.12281	0.01685	A2	KANSL1	yes
rs62060762	17	44133396	A	G	0.2252	2.17e-08	-0.0549	0.0098	A	G	0.1834	4.73e-13	-0.12193	0.016858	A2	KANSL1	yes
rs62060763	17	44133403	T	C	0.7748	2.27e-08	0.0548	0.0098	C	T	0.1834	2.9e-13	-0.12298	0.016849	A2	KANSL1	yes
rs111259120	17	44133534	T	C	0.2252	2.42e-08	-0.0547	0.0098	T	C	0.1835	2.05e-13	-0.12374	0.016846	A2	KANSL1	yes
rs62060764	17	44133633	A	G	0.7748	2.36e-08	0.0548	0.0098	G	A	0.1835	1.7e-13	-0.12415	0.016844	A2	KANSL1	yes
rs62060765	17	44133648	A	C	0.7748	2.35e-08	0.0548	0.0098	C	A	0.1834	2.33e-13	-0.12345	0.016846	A2	KANSL1	yes
rs17575507	17	44134095	A	G	0.7748	2.23e-08	0.0549	0.0098	G	A	0.1818	1.02e-11	-0.12168	0.017883	A2	KANSL1	yes
rs62060767	17	44134910	A	G	0.2252	2.33e-08	-0.0548	0.0098	A	G	0.1835	3.43e-13	-0.12271	0.016864	A2	KANSL1	yes
rs62060769	17	44135026	C	G	0.2252	2.33e-08	-0.0548	0.0098	C	G	0.1835	3.08e-13	-0.1229	0.016856	A2	KANSL1	yes
rs1107820	17	44135359	T	C	0.7748	2.35e-08	0.0548	0.0098	C	T	0.1835	1.91e-13	-0.12387	0.016842	A2	KANSL1	yes
rs17575556	17	44135827	A	G	0.2252	2.35e-08	-0.0548	0.0098	A	G	0.1835	2.14e-13	-0.12364	0.016845	A2	KANSL1	yes
rs17653998	17	44135985	A	G	0.7748	2.19e-08	0.0549	0.0098	G	A	0.1835	1.95e-13	-0.12385	0.016845	A2	KANSL1	yes
rs111372048	17	44136577	A	C	0.7748	1.88e-08	0.0552	0.0098	C	A	0.1834	1.41e-13	-0.12456	0.016843	A2	KANSL1	yes
rs62060785	17	44136634	A	G	0.2252	2.21e-08	-0.0549	0.0098	A	G	0.1835	1.58e-13	-0.12437	0.016852	A2	KANSL1	yes
rs62060786	17	44136763	T	C	0.2252	2.21e-08	-0.0549	0.0098	T	C	0.1835	1.96e-13	-0.12392	0.016857	A2	KANSL1	yes
rs55714296	17	44137189	A	T	0.7747	2.14e-08	0.0549	0.0098	T	A	0.1905	1.33e-13	-0.12478	0.016855	A2	KANSL1	yes
rs55690782	17	44137311	A	G	0.2253	2.24e-08	-0.0549	0.0098	A	G	0.1835	2.17e-13	-0.12369	0.016856	A2	KANSL1	yes
rs17654016	17	44137925	T	C	0.7748	2.25e-08	0.0549	0.0098	C	T	0.1835	9.55e-14	-0.12542	0.016842	A2	KANSL1	yes
rs7220752	17	44138201	T	C	0.7681	3.93e-08	0.0535	0.0097	C	T	0.1867	7.57e-14	-0.12516	0.016738	A2	KANSL1	yes
rs2316951	17	44139083	C	G	0.2252	2.25e-08	-0.0548	0.0098	C	G	0.1835	1.88e-13	-0.1239	0.016841	A2	KANSL1	yes
rs2316952	17	44139190	C	G	0.2252	2.24e-08	-0.0549	0.0098	C	G	0.1835	1.8e-13	-0.12402	0.016843	A2	KANSL1	yes
rs2838	17	44141347	A	G	0.7748	2.21e-08	0.0549	0.0098	G	A	0.2258	7.28e-11	-0.1172	0.017989	A2	KANSL1	yes
rs12150127	17	44141732	A	G	0.2252	2.27e-08	-0.0548	0.0098	A	G	0.1834	1.53e-13	-0.12441	0.016847	A2	KANSL1	yes
rs62060792	17	44141955	A	T	0.2252	2.22e-08	-0.0549	0.0098	A	T	0.1835	1.2e-13	-0.12492	0.016843	A2	KANSL1	yes
rs76307183	17	44142121	A	G	0.2252	2.23e-08	-0.0549	0.0098	A	G	0.1835	1.47e-13	-0.1245	0.016847	A2	KANSL1	yes
rs62060793	17	44142427	A	G	0.7748	2.2e-08	0.0549	0.0098	G	A	0.1835	1.51e-13	-0.12444	0.016846	A2	KANSL1	yes
rs62060794	17	44142566	T	C	0.2252	2.28e-08	-0.0548	0.0098	T	C	0.1835	1.65e-13	-0.12428	0.016853	A2	KANSL1	yes
rs62060795	17	44142663	T	C	0.2252	2.24e-08	-0.0549	0.0098	T	C	0.1835	1.14e-13	-0.12507	0.016847	A2	KANSL1	yes
rs17575773	17	44142879	T	C	0.2252	2.25e-08	-0.0548	0.0098	T	C	0.1818	8.65e-12	-0.12216	0.017892	A2	KANSL1	yes
rs62060796	17	44143029	T	G	0.2252	2.23e-08	-0.0549	0.0098	T	G	0.18	3.2e-13	-0.12287	0.016865	A2	KANSL1	yes
rs62060797	17	44143344	A	G	0.2252	2.24e-08	-0.0549	0.0098	A	G	0.1835	1.68e-13	-0.12419	0.016847	A2	KANSL1	yes
rs12150344	17	44143484	A	G	0.2252	2.24e-08	-0.0549	0.0098	A	G	0.1835	1.58e-13	-0.1243	0.016843	A2	KANSL1	yes
rs62060798	17	44144152	T	C	0.7748	2.25e-08	0.0548	0.0098	C	T	0.1835	9.79e-14	-0.12538	0.016844	A2	KANSL1	yes
rs62060799	17	44144251	T	G	0.2252	2.24e-08	-0.0549	0.0098	T	G	0.1835	1.27e-13	-0.12479	0.016842	A2	KANSL1	yes
rs17575822	17	44144345	A	G	0.7748	1.78e-08	0.0553	0.0098	G	A	0.1834	1.17e-13	-0.12497	0.016842	A2	KANSL1	yes
rs17575850	17	44144387	A	C	0.2252	1.97e-08	-0.0551	0.0098	A	C	0.1834	1.17e-13	-0.12498	0.016844	A2	KANSL1	yes
rs17659731	17	44144634	A	G	0.2252	1.87e-08	-0.0552	0.0098	A	G	0.1834	1.19e-13	-0.12493	0.016843	A2	KANSL1	yes
rs75641221	17	44145373	T	C	0.7748	1.86e-08	0.0552	0.0098	C	T	0.1834	1.12e-13	-0.12509	0.016843	A2	KANSL1	yes
rs62060800	17	44145592	A	G	0.7748	1.84e-08	0.0552	0.0098	G	A	0.1834	1.19e-13	-0.12494	0.016842	A2	KANSL1	yes
rs62060801	17	44145860	A	G	0.7748	1.85e-08	0.0552	0.0098	G	A	0.1834	1.31e-13	-0.12475	0.016847	A2	KANSL1	yes
rs62060802	17	44146336	A	C	0.7749	1.87e-08	0.0552	0.0098	C	A	0.1834	1.35e-13	-0.12468	0.016846	A2	KANSL1	yes
rs75975083	17	44146357	T	C	0.7748	1.97e-08	0.0551	0.0098	C	T	0.1834	1.21e-13	-0.12493	0.016847	A2	KANSL1	yes
rs77950913	17	44146451	T	C	0.7748	1.9e-08	0.0551	0.0098	C	T	0.1834	1.71e-13	-0.12423	0.016857	A2	KANSL1	yes
rs79782347	17	44146567	T	C	0.7748	1.9e-08	0.0551	0.0098	C	T	0.1834	1.73e-13	-0.12419	0.016855	A2	KANSL1	yes
rs56318865	17	44147411	A	G	0.2252	2.22e-08	-0.0549	0.0098	A	G	0.1835	1.69e-13	-0.12416	0.016843	A2	KANSL1	yes
rs55947022	17	44147574	A	G	0.2252	2.28e-08	-0.0548	0.0098	A	G	0.1834	1.01e-13	-0.1253	0.016843	A2	KANSL1	yes
rs55929190	17	44147599	C	G	0.2252	2.28e-08	-0.0548	0.0098	C	G	0.1834	9.96e-14	-0.12533	0.016843	A2	KANSL1	yes
rs56323408	17	44147721	T	C	0.2252	2.31e-08	-0.0548	0.0098	T	C	0.1834	9.85e-14	-0.12536	0.016843	A2	KANSL1	yes
rs55831516	17	44148267	T	C	0.2252	2.43e-08	-0.0547	0.0098	T	C	0.1834	1.29e-13	-0.12475	0.016843	A2	KANSL1	yes
rs62060809	17	44148613	A	G	0.2252	2.37e-08	-0.0548	0.0098	A	G	0.1834	9.88e-14	-0.12536	0.016844	A2	KANSL1	yes
rs62060810	17	44148674	A	G	0.7748	2.35e-08	0.0548	0.0098	G	A	0.1834	1.47e-13	-0.1245	0.016846	A2	KANSL1	yes
rs12150611	17	44149741	A	G	0.2252	2.24e-08	-0.0549	0.0098	A	G	0.1834	1.3e-13	-0.12478	0.016847	A2	KANSL1	yes
rs74850776	17	44150042	T	C	0.7748	2.22e-08	0.0549	0.0098	C	T	0.1834	1.07e-13	-0.1252	0.016847	A2	KANSL1	yes
rs974293	17	44150233	A	G	0.2252	2.24e-08	-0.0549	0.0098	A	G	0.1834	1.07e-13	-0.12517	0.016842	A2	KANSL1	yes
rs974292	17	44150464	T	C	0.7748	2.23e-08	0.0549	0.0098	C	T	0.1834	1.53e-13	-0.12439	0.016845	A2	KANSL1	yes
rs974291	17	44150480	A	T	0.7748	2.24e-08	0.0549	0.0098	T	A	0.1905	1.52e-13	-0.12441	0.016845	A2	KANSL1	yes
rs12150558	17	44151156	T	C	0.7748	2.26e-08	0.0548	0.0098	C	T	0.1834	1.61e-13	-0.12427	0.016844	A2	KANSL1	yes
rs9907738	17	44151546	T	G	0.7681	4.73e-08	0.0531	0.0097	G	T	0.1867	6.23e-14	-0.12559	0.016739	A2	KANSL1	yes
rs62060812	17	44151667	A	G	0.7748	2.26e-08	0.0548	0.0098	G	A	0.1834	2.05e-13	-0.12376	0.016849	A2	KANSL1	yes
rs62060834	17	44151697	A	T	0.7748	2.24e-08	0.0549	0.0098	T	A	0.1905	1.88e-13	-0.12426	0.016889	A2	KANSL1	yes
rs62060835	17	44152390	T	C	0.2252	2.22e-08	-0.0549	0.0098	T	C	0.1834	1.81e-13	-0.12403	0.016846	A2	KANSL1	yes
rs62060836	17	44152447	A	G	0.2252	2.31e-08	-0.0548	0.0098	A	G	0.1834	1.58e-13	-0.12432	0.016845	A2	KANSL1	yes
rs62060838	17	44153144	A	G	0.7748	2.22e-08	0.0549	0.0098	G	A	0.1834	1.31e-13	-0.12472	0.016843	A2	KANSL1	yes
rs62060839	17	44153227	A	G	0.7748	2.25e-08	0.0548	0.0098	G	A	0.1834	1.45e-13	-0.12454	0.016848	A2	KANSL1	yes
rs62060841	17	44153386	A	T	0.7748	2.19e-08	0.0549	0.0098	T	A	0.1905	2.46e-13	-0.12331	0.016843	A2	KANSL1	yes
rs62060843	17	44153626	T	C	0.2252	2.24e-08	-0.0549	0.0098	T	C	0.1832	5e-13	-0.12193	0.016876	A2	KANSL1	yes
rs62060845	17	44154393	A	G	0.7748	2.29e-08	0.0548	0.0098	G	A	0.1834	1.97e-13	-0.12385	0.016849	A2	KANSL1	yes
rs62060846	17	44154461	A	C	0.7748	2.24e-08	0.0549	0.0098	C	A	0.1834	1.46e-13	-0.12451	0.016847	A2	KANSL1	yes
rs74481389	17	44154607	T	C	0.7749	2.31e-08	0.0548	0.0098	C	T	0.1834	1.36e-13	-0.12469	0.016851	A2	KANSL1	yes
rs62060847	17	44154946	T	C	0.2252	2.35e-08	-0.0548	0.0098	T	C	0.1835	1.07e-13	-0.12519	0.016845	A2	KANSL1	yes
rs55972730	17	44155707	T	C	0.2252	2.25e-08	-0.0548	0.0098	T	C	0.1834	1.58e-13	-0.12434	0.016849	A2	KANSL1	yes
rs2066899	17	44155732	T	C	0.2319	4.44e-08	-0.0532	0.0097	T	C	0.1849	2.9e-12	-0.12408	0.01777	A2	KANSL1	yes
rs62060850	17	44157982	A	T	0.7748	2.22e-08	0.0549	0.0098	T	A	0.1905	1.74e-13	-0.12411	0.016846	A2	KANSL1	yes
rs1476554	17	44159102	T	C	0.2252	2.31e-08	-0.0548	0.0098	T	C	0.1834	1.4e-13	-0.12462	0.016849	A2	KANSL1	yes
rs77138434	17	44159555	A	C	0.2251	2.57e-08	-0.0546	0.0098	A	C	0.1834	1.97e-13	-0.12386	0.016849	A2	KANSL1	yes
rs111519055	17	44159672	A	G	0.7748	2.33e-08	0.0548	0.0098	G	A	0.1834	1.21e-13	-0.12492	0.016845	A2	KANSL1	yes
rs77925835	17	44159695	T	C	0.2252	2.46e-08	-0.0547	0.0098	T	C	0.1834	1.73e-13	-0.12415	0.016849	A2	KANSL1	yes
rs17659953	17	44159725	T	C	0.2252	2.27e-08	-0.0548	0.0098	T	C	0.1818	7.23e-12	-0.1226	0.017889	A2	KANSL1	yes
rs17576165	17	44159849	T	C	0.7748	2.24e-08	0.0549	0.0098	C	T	0.1834	1.49e-13	-0.12447	0.016847	A2	KANSL1	yes
rs17576200	17	44159988	A	G	0.2252	2.23e-08	-0.0549	0.0098	A	G	0.1834	1.52e-13	-0.12445	0.01685	A2	KANSL1	yes
rs62060852	17	44160050	A	G	0.2252	2.21e-08	-0.0549	0.0098	A	G	0.1834	1.89e-13	-0.12398	0.016854	A2	KANSL1	yes
rs62060853	17	44160592	A	G	0.2252	2.29e-08	-0.0548	0.0098	A	G	0.1834	1.71e-13	-0.12414	0.016846	A2	KANSL1	yes
rs17660017	17	44160674	C	G	0.2252	2.32e-08	-0.0548	0.0098	C	G	0.1834	1.43e-13	-0.12454	0.016844	A2	KANSL1	yes
rs113788190	17	44161302	A	G	0.7748	2.28e-08	0.0548	0.0098	G	A	0.1834	1.4e-13	-0.12459	0.016846	A2	KANSL1	yes
rs112364920	17	44161360	A	T	0.7748	2.3e-08	0.0548	0.0098	T	A	0.1905	1.42e-13	-0.12457	0.016846	A2	KANSL1	yes
rs80028338	17	44161470	A	C	0.7812	3.18e-08	0.0555	0.01	C	A	0.1745	2.36e-13	-0.12474	0.017026	A2	KANSL1	yes
rs62060855	17	44161860	T	C	0.2252	2.52e-08	-0.0547	0.0098	T	C	0.1834	1.34e-13	-0.12471	0.016848	A2	KANSL1	yes
rs17660065	17	44162284	T	C	0.7748	2.29e-08	0.0548	0.0098	C	T	0.1834	1.39e-13	-0.12459	0.016843	A2	KANSL1	yes
rs8080583	17	44162597	A	C	0.2319	4.59e-08	-0.0532	0.0097	A	C	0.1867	5.55e-14	-0.12581	0.016734	A2	KANSL1	yes
rs55864131	17	44163411	T	C	0.7748	2.32e-08	0.0548	0.0098	C	T	0.1834	1.33e-13	-0.12468	0.016843	A2	KANSL1	yes
rs62060858	17	44164090	C	G	0.2252	2.43e-08	-0.0547	0.0098	C	G	0.1834	1.37e-13	-0.12465	0.016847	A2	KANSL1	yes
rs62060859	17	44164133	A	G	0.2252	2.37e-08	-0.0548	0.0098	A	G	0.1834	1.51e-13	-0.12448	0.016853	A2	KANSL1	yes
rs55692232	17	44164323	A	G	0.2252	2.44e-08	-0.0547	0.0098	A	G	0.1834	1.73e-13	-0.12415	0.016849	A2	KANSL1	yes
rs3912063	17	44165049	A	G	0.7751	2.55e-08	0.0547	0.0098	G	A	0.1831	1.68e-13	-0.12424	0.016853	A2	KANSL1	yes
rs3912062	17	44165069	A	G	0.775	2.59e-08	0.0546	0.0098	G	A	0.1831	1.68e-13	-0.12423	0.016852	A2	KANSL1	yes
rs3912061	17	44165098	T	C	0.2252	2.6e-08	-0.0546	0.0098	T	C	0.1834	1.5e-13	-0.12474	0.016886	A2	KANSL1	yes
rs1378358	17	44787312	T	C	0.2126	4.39e-09	-0.0585	0.01	T	C	0.1756	2.93e-13	-0.12628	0.017305	A2	NSF	yes
rs169201	17	44790203	A	G	0.7875	3.86e-09	0.0586	0.01	G	A	0.1754	7.81e-13	-0.1241	0.017322	A2	NSF	yes
rs199439	17	44793503	A	G	0.7872	3.13e-09	0.059	0.01	G	A	0.1755	3.79e-13	-0.12585	0.017327	A2	NSF	yes
rs199457	17	44795469	T	C	0.2124	2.87e-09	-0.0592	0.01	T	C	0.1754	3.43e-13	-0.12604	0.017322	A2	NSF	yes
rs199456	17	44797919	T	C	0.2123	2.57e-09	-0.0593	0.01	T	C	0.1751	2.59e-13	-0.12677	0.017332	A2	NSF	yes
rs199451	17	44801784	A	G	0.2119	2.62e-09	-0.0594	0.01	A	G	0.175	2.62e-13	-0.12691	0.017354	A2	NSF	yes
rs199448	17	44809001	A	G	0.788	6.01e-09	0.058	0.01	G	A	0.1755	3.87e-13	-0.12585	0.017335	A2	NSF	yes
rs199447	17	44812188	T	C	0.2118	6.16e-09	-0.058	0.01	T	C	0.1756	1.86e-13	-0.12746	0.017321	A2	NSF	yes
rs199445	17	44817408	T	C	0.2122	6.39e-09	-0.0579	0.01	T	C	0.1756	1.77e-13	-0.1275	0.017312	A2	NSF	yes
rs199535	17	44822662	A	G	0.7876	7.63e-09	0.0575	0.01	G	A	0.1756	2.46e-13	-0.12678	0.017316	A2	NSF	yes
rs199534	17	44824213	T	G	0.7881	6.45e-09	0.0579	0.01	G	T	0.1754	2.52e-13	-0.1268	0.017328	A2	NSF	yes
rs9896243	17	44826056	C	G	0.7862	1.35e-08	0.0566	0.01	G	C	0.1819	1.11e-13	-0.12845	0.017294	A2	NSF	yes
rs199533	17	44828931	A	G	0.2139	1.3e-08	-0.0563	0.0099	A	G	0.1767	5.22e-13	-0.1246	0.017258	A2	NSF	yes
rs199528	17	44843136	T	C	0.2127	9.87e-09	-0.0572	0.01	T	C	0.1757	1.01e-12	-0.12354	0.017327	A2	WNT3	yes
rs199526	17	44847707	C	G	0.2364	1.71e-08	-0.055	0.0097	G	C	0.7881	6.79e-13	0.12202	0.016986	A2	WNT3	yes
rs199525	17	44847834	T	G	0.7866	1.18e-08	0.0568	0.01	G	T	0.1764	8.62e-13	-0.12359	0.017283	A2	WNT3	yes
rs199516	17	44856485	T	C	0.7758	8.91e-09	0.0572	0.01	T	C	0.8201	1.93e-08	0.13169	0.02344	A2	WNT3	yes
rs199515	17	44856641	C	G	0.7806	5.97e-09	0.0576	0.0099	C	G	0.8198	1.23e-13	0.12793	0.017255	A2	WNT3	yes
rs199514	17	44856881	A	G	0.7757	1.04e-08	0.057	0.01	A	G	0.82	6.57e-14	0.12927	0.017245	A2	WNT3	yes
rs199513	17	44856932	A	G	0.2243	1e-08	-0.057	0.01	G	A	0.8207	1.39e-13	0.12635	0.017081	A2	WNT3	yes
rs199512	17	44857352	T	C	0.2241	1.31e-08	-0.0566	0.01	C	T	0.8203	5.68e-14	0.12967	0.017254	A2	WNT3	yes
rs199509	17	44858728	A	G	0.7765	1.25e-08	0.0566	0.0099	A	G	0.8201	1.29e-08	0.13334	0.023443	A2	WNT3	yes
rs199507	17	44858855	A	G	0.2242	1.26e-08	-0.0566	0.01	G	A	0.8201	1.5e-08	0.13275	0.023447	A2	WNT3	yes
rs199506	17	44859031	A	G	0.2241	1.2e-08	-0.0567	0.01	G	A	0.8202	1.68e-13	0.12732	0.017272	A2	WNT3	yes
rs415430	17	44859144	T	C	0.7787	2.23e-08	0.0555	0.0099	T	C	0.8208	8.87e-14	0.12862	0.017249	A2	WNT3	yes
rs430685	17	44859148	T	C	0.2242	1.24e-08	-0.0567	0.01	C	T	0.8201	7.71e-14	0.12897	0.017253	A2	WNT3	yes
rs199505	17	44859410	A	G	0.224	1.15e-08	-0.0569	0.01	G	A	0.8202	1.92e-13	0.12707	0.017278	A2	WNT3	yes
rs70602	17	44859715	T	C	0.2238	1.43e-08	-0.0565	0.01	C	T	0.8206	9.96e-14	0.12864	0.017288	A2	WNT3	yes
rs70600	17	44860021	T	C	0.2133	1.08e-08	-0.0569	0.01	T	C	0.1762	6.24e-13	-0.12427	0.017271	A2	WNT3	yes
rs199504	17	44861003	T	C	0.7733	2.65e-08	0.0553	0.0099	T	C	0.822	5.14e-13	0.12452	0.017242	A2	WNT3	yes
rs199501	17	44862613	A	G	0.2506	2.35e-08	-0.0529	0.0095	G	A	0.7916	1.48e-12	0.11629	0.016435	A2	WNT3	yes
rs199498	17	44865603	T	C	0.7767	4.36e-09	0.0592	0.0101	C	T	0.1956	2.79e-10	-0.10866	0.017221	A2	WNT3	yes
rs55974014	17	43757450	A	C	0.2188	1.72e-08	-0.056	0.0099	A	C	0.1768	1.78e-13	-0.086616	0.011761	B2	LINC02210-CRHR1	yes
rs78471340	17	43768346	A	G	0.2252	4.51e-08	-0.0536	0.0098	A	G	0.1832	4.43e-14	-0.08664	0.011479	B2	LINC02210-CRHR1	yes
rs78052495	17	43768347	T	C	0.2252	4.58e-08	-0.0535	0.0098	T	C	0.1832	4.78e-14	-0.08652	0.011478	B2	LINC02210-CRHR1	yes
rs968028	17	43781105	A	G	0.7743	4.81e-08	0.0534	0.0098	G	A	0.1824	2.55e-12	-0.086342	0.012334	B2	LINC02210-CRHR1	yes
rs62056879	17	43781426	T	C	0.7743	4.62e-08	0.0534	0.0098	C	T	0.1833	2.33e-14	-0.087494	0.011466	B2	LINC02210-CRHR1	yes
rs62056905	17	43782693	A	G	0.773	2.97e-08	0.0541	0.0098	G	A	0.1843	3e-14	-0.086988	0.011449	B2	LINC02210-CRHR1	yes
rs62056912	17	43784948	T	G	0.2257	4.95e-08	-0.0533	0.0098	T	G	0.1834	4.04e-14	-0.086704	0.011469	B2	LINC02210-CRHR1	yes
rs62056913	17	43784994	T	C	0.2249	4.39e-08	-0.0536	0.0098	T	C	0.1832	2.24e-14	-0.087669	0.011481	B2	LINC02210-CRHR1	yes
rs56290582	17	43788371	T	C	0.2257	4.87e-08	-0.0533	0.0098	T	C	0.1835	3.6e-14	-0.08684	0.011464	B2	LINC02210-CRHR1	yes
rs62056930	17	43789640	A	C	0.7741	4.71e-08	0.0534	0.0098	C	A	0.1842	1.41e-14	-0.088234	0.011466	B2	LINC02210-CRHR1	yes
rs62056931	17	43789698	A	G	0.2241	3.61e-08	-0.054	0.0098	A	G	0.1824	1.88e-14	-0.088127	0.011507	B2	LINC02210-CRHR1	yes
rs56220242	17	43792326	T	C	0.2257	4.72e-08	-0.0534	0.0098	T	C	0.1834	3.34e-14	-0.086941	0.011463	B2	LINC02210-CRHR1	yes
rs56160448	17	43792358	A	G	0.7743	4.65e-08	0.0534	0.0098	G	A	0.1834	2.92e-14	-0.087143	0.011464	B2	LINC02210-CRHR1	yes
rs1880749	17	43792586	A	C	0.7743	4.79e-08	0.0533	0.0098	C	A	0.1837	1.93e-14	-0.087884	0.01148	B2	LINC02210-CRHR1	yes
rs1568951	17	43792895	T	G	0.7743	4.83e-08	0.0533	0.0098	G	T	0.1833	3.54e-14	-0.086861	0.011464	B2	LINC02210-CRHR1	yes
rs1568950	17	43792896	T	C	0.7743	4.75e-08	0.0533	0.0098	C	T	0.1833	3.55e-14	-0.086857	0.011464	B2	LINC02210-CRHR1	yes
rs55838058	17	43798902	T	C	0.2251	4.01e-08	-0.0537	0.0098	T	C	0.1829	3.48e-14	-0.087013	0.011481	B2	LINC02210-CRHR1	yes
rs56062621	17	43798903	A	G	0.7749	4.04e-08	0.0537	0.0098	G	A	0.1829	2.65e-14	-0.08742	0.011481	B2	LINC02210-CRHR1	yes
rs55896111	17	43799048	A	G	0.2251	4.33e-08	-0.0536	0.0098	A	G	0.1826	7.3e-09	-0.074725	0.01292	B2	LINC02210-CRHR1	yes
rs11079721	17	43840107	A	C	0.2258	4.68e-08	-0.0533	0.0098	A	C	0.1834	4.51e-14	-0.086488	0.011463	B2	LINC02210-CRHR1	yes
rs62055900	17	43845002	C	G	0.7744	4.94e-08	0.0532	0.0098	G	C	0.1867	1.96e-14	-0.087744	0.011465	B2	LINC02210-CRHR1	yes
rs62055901	17	43845041	A	G	0.2257	4.99e-08	-0.0532	0.0098	A	G	0.1832	2.74e-14	-0.08722	0.011461	B2	LINC02210-CRHR1	yes
rs62055928	17	43847374	A	G	0.2256	4.8e-08	-0.0533	0.0098	A	G	0.1833	2.03e-14	-0.087662	0.011461	B2	LINC02210-CRHR1	yes
rs62055932	17	43848412	A	G	0.7749	3.62e-08	0.0539	0.0098	G	A	0.1832	3.48e-14	-0.086952	0.011473	B2	LINC02210-CRHR1	yes
rs62055933	17	43848461	A	G	0.2252	4.33e-08	-0.0535	0.0098	A	G	0.1833	2.63e-14	-0.087361	0.011472	B2	LINC02210-CRHR1	yes
rs62055935	17	43848750	T	C	0.7751	4.57e-08	0.0535	0.0098	C	T	0.1829	3.43e-14	-0.087124	0.011492	B2	LINC02210-CRHR1	yes
rs62055936	17	43848761	A	T	0.2248	3.25e-08	-0.0541	0.0098	A	T	0.183	5e-09	-0.075474	0.012908	B2	LINC02210-CRHR1	yes
rs62055937	17	43848968	T	G	0.2232	3.33e-08	-0.0543	0.0098	T	G	0.1824	4.71e-13	-0.083364	0.011525	B2	LINC02210-CRHR1	yes
rs62055946	17	43851971	A	C	0.2256	4.78e-08	-0.0533	0.0098	A	C	0.1834	2.48e-14	-0.087355	0.01146	B2	LINC02210-CRHR1	yes
rs113871181	17	43852733	A	G	0.2251	3.51e-08	-0.0539	0.0098	A	G	0.1832	3.47e-14	-0.086981	0.011476	B2	LINC02210-CRHR1	yes
rs111370985	17	43852742	T	C	0.7748	3.5e-08	0.0539	0.0098	C	T	0.1832	3.48e-14	-0.086968	0.011475	B2	LINC02210-CRHR1	yes
rs62055950	17	43853133	T	C	0.7744	4.87e-08	0.0532	0.0098	C	T	0.1834	1.74e-14	-0.087878	0.011459	B2	LINC02210-CRHR1	yes
rs56043078	17	43853235	T	G	0.7744	4.86e-08	0.0532	0.0098	G	T	0.1833	2.16e-14	-0.08756	0.01146	B2	LINC02210-CRHR1	yes
rs77965652	17	43853457	A	G	0.7744	4.95e-08	0.0532	0.0098	G	A	0.1834	2.65e-14	-0.087266	0.01146	B2	LINC02210-CRHR1	yes
rs55849949	17	43853526	A	G	0.7744	4.72e-08	0.0533	0.0098	G	A	0.1834	5.04e-09	-0.07526	0.012874	B2	LINC02210-CRHR1	yes
rs55991914	17	43854267	T	C	0.2256	4.98e-08	-0.0532	0.0098	T	C	0.1834	5.6e-09	-0.075026	0.012873	B2	LINC02210-CRHR1	yes
rs62055955	17	43854340	A	G	0.7743	4.83e-08	0.0532	0.0098	G	A	0.1834	2.37e-14	-0.087405	0.011457	B2	LINC02210-CRHR1	yes
rs62057062	17	43856710	A	G	0.2255	4.68e-08	-0.0533	0.0098	A	G	0.1834	4.4e-09	-0.075551	0.012874	B2	LINC02210-CRHR1	yes
rs62057063	17	43856730	T	C	0.2255	4.52e-08	-0.0534	0.0098	T	C	0.1833	2.58e-14	-0.087337	0.011465	B2	LINC02210-CRHR1	yes
rs62057064	17	43857033	T	C	0.2256	4.53e-08	-0.0534	0.0098	T	C	0.1834	1.77e-14	-0.087848	0.011459	B2	LINC02210-CRHR1	yes
rs76830096	17	43857129	A	C	0.7743	4.76e-08	0.0533	0.0098	C	A	0.1834	2.53e-14	-0.087334	0.011461	B2	LINC02210-CRHR1	yes
rs62057065	17	43858187	T	G	0.2256	4.45e-08	-0.0534	0.0098	T	G	0.2049	6.26e-09	-0.075312	0.012963	B2	LINC02210-CRHR1	yes
rs55915917	17	43892784	T	G	0.7745	4.1e-08	0.0537	0.0098	G	T	0.2197	2.02e-13	-0.086103	0.011718	B2	CRHR1;LINC02210-CRHR1	yes
rs55668363	17	43892788	A	G	0.2248	4.13e-08	-0.0537	0.0098	A	G	0.2192	3.04e-08	-0.073413	0.013253	B2	CRHR1;LINC02210-CRHR1	yes
rs17689471	17	43892973	T	C	0.7741	4.11e-08	0.0535	0.0097	C	T	0.1836	4.57e-14	-0.086416	0.011455	B2	CRHR1;LINC02210-CRHR1	yes
rs117646503	17	43893260	T	C	0.7741	4.51e-08	0.0533	0.0097	C	T	0.1835	4.94e-14	-0.086316	0.011458	B2	CRHR1;LINC02210-CRHR1	yes
rs17762769	17	43893403	A	G	0.2259	4.5e-08	-0.0533	0.0097	A	G	0.1838	4.34e-14	-0.086503	0.011457	B2	CRHR1;LINC02210-CRHR1	yes
rs28364025	17	43894102	T	C	0.774	4.45e-08	0.0533	0.0097	C	T	0.1835	3.93e-14	-0.086643	0.011456	B2	CRHR1;LINC02210-CRHR1	yes
rs28364023	17	43894159	T	C	0.2259	4.66e-08	-0.0533	0.0097	T	C	0.1827	2.51e-12	-0.086152	0.012303	B2	CRHR1;LINC02210-CRHR1	yes
rs55779147	17	43894510	A	G	0.2258	4.96e-08	-0.0532	0.0097	A	G	0.1835	8.88e-09	-0.074032	0.012873	B2	CRHR1;LINC02210-CRHR1	yes
rs56357543	17	43894547	T	C	0.2258	4.05e-08	-0.0535	0.0097	T	C	0.1835	4.55e-14	-0.086441	0.011458	B2	CRHR1;LINC02210-CRHR1	yes
rs56099546	17	43894609	A	G	0.7742	3.78e-08	0.0536	0.0097	G	A	0.1835	4.26e-14	-0.086529	0.011457	B2	CRHR1;LINC02210-CRHR1	yes
rs739645	17	43894990	T	G	0.774	4.57e-08	0.0533	0.0097	G	T	0.1835	4.41e-14	-0.086506	0.01146	B2	CRHR1;LINC02210-CRHR1	yes
rs739644	17	43895008	C	G	0.7741	4.67e-08	0.0532	0.0097	G	C	0.1871	1.04e-13	-0.0853	0.011472	B2	CRHR1;LINC02210-CRHR1	yes
rs4564621	17	43895501	C	G	0.2258	4.77e-08	-0.0532	0.0097	C	G	0.1835	5.85e-14	-0.086077	0.01146	B2	CRHR1;LINC02210-CRHR1	yes
rs2316763	17	43895530	T	C	0.2258	4.5e-08	-0.0533	0.0097	T	C	0.1835	4.96e-14	-0.086329	0.01146	B2	CRHR1;LINC02210-CRHR1	yes
rs2316764	17	43895602	T	G	0.7742	3.89e-08	0.0536	0.0097	G	T	0.1835	6.21e-14	-0.085985	0.011459	B2	CRHR1;LINC02210-CRHR1	yes
rs4277389	17	43895653	A	G	0.7742	3.74e-08	0.0536	0.0097	G	A	0.1835	9.01e-09	-0.073985	0.012871	B2	CRHR1;LINC02210-CRHR1	yes
rs4566211	17	43895696	A	G	0.2259	4.52e-08	-0.0533	0.0097	A	G	0.1835	8.48e-14	-0.085524	0.01146	B2	CRHR1;LINC02210-CRHR1	yes
rs4566212	17	43895751	A	G	0.2259	4.47e-08	-0.0533	0.0097	A	G	0.1835	6.76e-14	-0.085842	0.011457	B2	CRHR1;LINC02210-CRHR1	yes
rs4309444	17	43895797	T	C	0.7742	3.82e-08	0.0536	0.0097	C	T	0.1835	4.99e-14	-0.086294	0.011457	B2	CRHR1;LINC02210-CRHR1	yes
rs62057107	17	43896032	T	C	0.2258	3.68e-08	-0.0537	0.0097	T	C	0.1922	4.4e-13	-0.083549	0.011536	B2	CRHR1;LINC02210-CRHR1	yes
rs12150390	17	43896228	T	C	0.7741	4.54e-08	0.0533	0.0097	C	T	0.1835	4.37e-14	-0.086488	0.011456	B2	CRHR1;LINC02210-CRHR1	yes
rs17689608	17	43896528	C	G	0.7742	4e-08	0.0535	0.0097	G	C	0.1871	5.11e-14	-0.086259	0.011457	B2	CRHR1;LINC02210-CRHR1	yes
rs62057108	17	43896616	T	C	0.7742	3.83e-08	0.0536	0.0097	C	T	0.1835	3.58e-14	-0.08679	0.011457	B2	CRHR1;LINC02210-CRHR1	yes
rs62057109	17	43896637	T	C	0.7742	3.93e-08	0.0536	0.0097	C	T	0.1835	4.38e-14	-0.086484	0.011456	B2	CRHR1;LINC02210-CRHR1	yes
rs78074121	17	43896690	T	C	0.774	3.43e-08	0.0538	0.0097	C	T	0.1836	7.48e-14	-0.085658	0.011453	B2	CRHR1;LINC02210-CRHR1	yes
rs62057110	17	43896734	T	C	0.7742	3.81e-08	0.0536	0.0097	C	T	0.1835	5.11e-14	-0.086229	0.011453	B2	CRHR1;LINC02210-CRHR1	yes
rs62057111	17	43897130	A	G	0.7741	4.74e-08	0.0532	0.0097	G	A	0.1835	9.01e-09	-0.073958	0.012866	B2	CRHR1;LINC02210-CRHR1	yes
rs62057112	17	43897202	A	T	0.2259	4.53e-08	-0.0533	0.0097	A	T	0.1836	7.75e-14	-0.085626	0.011456	B2	CRHR1;LINC02210-CRHR1	yes
rs78587102	17	43897246	A	G	0.7742	4.69e-08	0.0532	0.0097	G	A	0.1835	4.83e-14	-0.086329	0.011455	B2	CRHR1;LINC02210-CRHR1	yes
rs62057113	17	43897449	A	T	0.7742	3.89e-08	0.0536	0.0097	T	A	0.1871	6.1e-14	-0.08599	0.011456	B2	CRHR1;LINC02210-CRHR1	yes
rs78506181	17	43897480	A	G	0.7741	4.66e-08	0.0533	0.0097	G	A	0.1835	5.55e-14	-0.08612	0.011455	B2	CRHR1;LINC02210-CRHR1	yes
rs79600142	17	43897722	T	C	0.7742	4.53e-08	0.0533	0.0097	C	T	0.1835	4.95e-14	-0.0863	0.011456	B2	CRHR1;LINC02210-CRHR1	yes
rs111739681	17	43898459	T	C	0.2258	3.87e-08	-0.0536	0.0097	T	C	0.1834	5e-14	-0.086285	0.011456	B2	CRHR1;LINC02210-CRHR1	yes
rs17762882	17	43898887	T	C	0.7742	3.96e-08	0.0535	0.0097	C	T	0.1835	3.91e-14	-0.086642	0.011454	B2	CRHR1;LINC02210-CRHR1	yes
rs17689653	17	43898963	A	T	0.7741	3.86e-08	0.0536	0.0097	T	A	0.1871	5.72e-14	-0.086078	0.011455	B2	CRHR1;LINC02210-CRHR1	yes
rs17762912	17	43899161	A	C	0.7742	3.9e-08	0.0536	0.0097	C	A	0.1834	4.41e-14	-0.086469	0.011455	B2	CRHR1;LINC02210-CRHR1	yes
rs62057114	17	43899401	T	C	0.2258	3.73e-08	-0.0536	0.0097	T	C	0.1835	9.87e-09	-0.073774	0.012868	B2	CRHR1;LINC02210-CRHR1	yes
rs62057115	17	43899417	C	G	0.2258	3.74e-08	-0.0536	0.0097	C	G	0.1835	7.66e-14	-0.085678	0.01146	B2	CRHR1;LINC02210-CRHR1	yes
rs78917479	17	43899611	T	C	0.2258	3.73e-08	-0.0536	0.0097	T	C	0.1835	4.71e-14	-0.086365	0.011455	B2	CRHR1;LINC02210-CRHR1	yes
rs62057116	17	43899655	T	C	0.7742	3.74e-08	0.0536	0.0097	C	T	0.1835	5.21e-14	-0.086233	0.011457	B2	CRHR1;LINC02210-CRHR1	yes
rs62057117	17	43899657	C	G	0.7742	3.85e-08	0.0536	0.0097	G	C	0.1871	6.47e-14	-0.08591	0.011457	B2	CRHR1;LINC02210-CRHR1	yes
rs62057118	17	43899727	A	G	0.7742	4.09e-08	0.0535	0.0098	G	A	0.1834	6.74e-14	-0.08586	0.011459	B2	CRHR1;LINC02210-CRHR1	yes
rs62057119	17	43899736	A	G	0.2258	3.94e-08	-0.0536	0.0097	A	G	0.1834	1.02e-08	-0.073706	0.01287	B2	CRHR1;LINC02210-CRHR1	yes
rs17762954	17	43899786	T	C	0.2259	3.97e-08	-0.0535	0.0097	T	C	0.1834	1.03e-08	-0.073691	0.012869	B2	CRHR1;LINC02210-CRHR1	yes
rs55638417	17	43900434	A	G	0.7742	3.52e-08	0.0538	0.0097	G	A	0.2049	1.38e-08	-0.073559	0.012959	B2	CRHR1;LINC02210-CRHR1	yes
rs79501144	17	43900697	T	C	0.2259	3.75e-08	-0.0536	0.0097	T	C	0.1835	7.89e-14	-0.085618	0.011458	B2	CRHR1;LINC02210-CRHR1	yes
rs112137135	17	43900817	A	G	0.7744	4.48e-08	0.0534	0.0098	G	A	0.2049	1.28e-08	-0.073734	0.012962	B2	CRHR1;LINC02210-CRHR1	yes
rs62057122	17	43901001	T	C	0.2259	4.05e-08	-0.0535	0.0097	T	C	0.1836	9.5e-09	-0.073863	0.01287	B2	CRHR1;LINC02210-CRHR1	yes
rs62057123	17	43901238	A	G	0.7741	4.05e-08	0.0535	0.0097	G	A	0.1838	3.23e-14	-0.087064	0.011473	B2	CRHR1;LINC02210-CRHR1	yes
rs62057143	17	43901528	T	C	0.7741	4.42e-08	0.0533	0.0097	C	T	0.1835	4.31e-14	-0.086497	0.011455	B2	CRHR1;LINC02210-CRHR1	yes
rs62057144	17	43901558	A	G	0.7741	4.47e-08	0.0533	0.0097	G	A	0.1835	5.33e-14	-0.086188	0.011456	B2	CRHR1;LINC02210-CRHR1	yes
rs4335809	17	43902216	T	C	0.2258	4.47e-08	-0.0533	0.0097	T	C	0.1835	6.15e-14	-0.085969	0.011455	B2	CRHR1;LINC02210-CRHR1	yes
rs4341787	17	43902505	T	C	0.2259	4.48e-08	-0.0533	0.0097	T	C	0.1835	6.8e-14	-0.085821	0.011455	B2	CRHR1;LINC02210-CRHR1	yes
rs4523962	17	43902522	A	G	0.2259	4.38e-08	-0.0534	0.0097	A	G	0.1835	9.63e-09	-0.073814	0.012866	B2	CRHR1;LINC02210-CRHR1	yes
rs3885074	17	43902738	A	C	0.2259	4.31e-08	-0.0534	0.0097	A	C	0.1835	9.48e-09	-0.073851	0.012866	B2	CRHR1;LINC02210-CRHR1	yes
rs34283254	17	43902861	A	C	0.2259	4.57e-08	-0.0533	0.0097	A	C	0.1835	1e-13	-0.085261	0.011459	B2	CRHR1;LINC02210-CRHR1	yes
rs1912151	17	43902944	T	C	0.2259	4.54e-08	-0.0533	0.0097	T	C	0.1827	2.85e-12	-0.085906	0.012299	B2	CRHR1;LINC02210-CRHR1	yes
rs1396862	17	43902997	A	G	0.2259	4.7e-08	-0.0532	0.0097	A	G	0.1835	5.26e-14	-0.086196	0.011454	B2	CRHR1;LINC02210-CRHR1	yes
rs41280118	17	43903089	T	C	0.2259	4.55e-08	-0.0533	0.0097	T	C	0.1827	3.7e-12	-0.08547	0.012301	B2	CRHR1;LINC02210-CRHR1	yes
rs62057147	17	43903298	A	G	0.2264	3.93e-08	-0.0535	0.0097	A	G	0.1838	7.98e-14	-0.08554	0.01145	B2	CRHR1;LINC02210-CRHR1	yes
rs62057148	17	43903485	C	G	0.2259	4.71e-08	-0.0532	0.0097	C	G	0.1835	4.58e-14	-0.086411	0.011455	B2	CRHR1;LINC02210-CRHR1	yes
rs62057149	17	43903546	A	G	0.7742	4.05e-08	0.0535	0.0097	G	A	0.1835	5.77e-14	-0.086068	0.011456	B2	CRHR1;LINC02210-CRHR1	yes
rs62057150	17	43903548	T	C	0.2259	4.22e-08	-0.0534	0.0097	T	C	0.1835	6.51e-14	-0.08589	0.011456	B2	CRHR1;LINC02210-CRHR1	yes
rs62057152	17	43904110	C	G	0.2258	4.45e-08	-0.0533	0.0097	C	G	0.1835	5.44e-14	-0.086142	0.011454	B2	CRHR1;LINC02210-CRHR1	yes
rs17689824	17	43904397	T	C	0.2259	4.38e-08	-0.0534	0.0097	T	C	0.1827	7.1e-12	-0.084386	0.012309	B2	CRHR1;LINC02210-CRHR1	yes
rs62057153	17	43904528	T	C	0.7741	4.35e-08	0.0534	0.0097	C	T	0.1835	4.94e-14	-0.086289	0.011454	B2	CRHR1;LINC02210-CRHR1	yes
rs62057154	17	43904610	T	C	0.2259	4.17e-08	-0.0535	0.0097	T	C	0.1835	6.12e-14	-0.085989	0.011457	B2	CRHR1;LINC02210-CRHR1	yes
rs62057155	17	43904673	T	C	0.2258	3.95e-08	-0.0536	0.0098	T	C	0.1835	5.6e-14	-0.086105	0.011455	B2	CRHR1;LINC02210-CRHR1	yes
rs62057156	17	43904948	C	G	0.2259	4.22e-08	-0.0534	0.0097	C	G	0.1835	4.97e-14	-0.086282	0.011454	B2	CRHR1;LINC02210-CRHR1	yes
rs78872653	17	43905134	A	G	0.2259	4.22e-08	-0.0534	0.0097	A	G	0.1835	5.16e-14	-0.086224	0.011454	B2	CRHR1;LINC02210-CRHR1	yes
rs62057157	17	43905313	C	G	0.2259	4.34e-08	-0.0534	0.0097	C	G	0.1835	5.35e-14	-0.08618	0.011455	B2	CRHR1;LINC02210-CRHR1	yes
rs17763086	17	43905481	T	G	0.7741	4.19e-08	0.0534	0.0097	G	T	0.1835	7.64e-14	-0.085656	0.011457	B2	CRHR1;LINC02210-CRHR1	yes
rs62057158	17	43907143	A	G	0.2258	3.65e-08	-0.0537	0.0098	A	G	0.1835	5.26e-14	-0.086205	0.011455	B2	CRHR1;LINC02210-CRHR1	yes
rs16940665	17	43907896	T	C	0.774	4.69e-08	0.0532	0.0097	C	T	0.1835	3.98e-14	-0.086642	0.011458	B2	CRHR1;LINC02210-CRHR1	yes
rs16940671	17	43908151	T	C	0.2255	4.32e-08	-0.0535	0.0098	T	C	0.1822	4.12e-12	-0.085424	0.012321	B2	CRHR1;LINC02210-CRHR1	yes
rs16940672	17	43908152	T	C	0.2255	4.26e-08	-0.0535	0.0098	T	C	0.1831	6.37e-14	-0.086041	0.011472	B2	CRHR1;LINC02210-CRHR1	yes
rs55763795	17	43908773	C	G	0.2259	4.51e-08	-0.0533	0.0097	C	G	0.1835	3.56e-14	-0.086772	0.011453	B2	CRHR1;LINC02210-CRHR1	yes
rs55865707	17	43908826	T	G	0.7741	4.67e-08	0.0533	0.0097	G	T	0.1835	8.52e-09	-0.074082	0.012866	B2	CRHR1;LINC02210-CRHR1	yes
rs62054760	17	43908989	T	C	0.2253	4.29e-08	-0.0535	0.0098	T	C	0.1831	7.78e-14	-0.08574	0.011472	B2	CRHR1;LINC02210-CRHR1	yes
rs62054761	17	43909008	T	C	0.2253	4.4e-08	-0.0535	0.0098	T	C	0.1828	1.19e-08	-0.073525	0.012896	B2	CRHR1;LINC02210-CRHR1	yes
rs62054762	17	43909022	T	G	0.2253	4.4e-08	-0.0535	0.0098	T	G	0.1828	1.03e-13	-0.085362	0.011478	B2	CRHR1;LINC02210-CRHR1	yes
rs17689918	17	43910088	A	G	0.2253	4.46e-08	-0.0534	0.0098	A	G	0.1833	4.56e-14	-0.086504	0.011467	B2	CRHR1;LINC02210-CRHR1	yes
rs17763199	17	43910183	A	G	0.2257	4.52e-08	-0.0534	0.0098	A	G	0.1834	5.66e-14	-0.086141	0.011461	B2	CRHR1;LINC02210-CRHR1	yes
rs62054763	17	43910262	C	G	0.7741	3.92e-08	0.0536	0.0098	G	C	0.1871	3.89e-14	-0.086646	0.011454	B2	CRHR1;LINC02210-CRHR1	yes
rs16940674	17	43910507	T	C	0.2259	3.49e-08	-0.0538	0.0097	T	C	0.1827	3.87e-12	-0.085403	0.012302	B2	CRHR1;LINC02210-CRHR1	yes
rs16940676	17	43911036	A	G	0.2257	4.21e-08	-0.0535	0.0098	A	G	0.1835	9.85e-09	-0.073795	0.012872	B2	CRHR1;LINC02210-CRHR1	yes
rs1876830	17	43911352	T	C	0.2258	4.05e-08	-0.0535	0.0098	T	C	0.1835	5.4e-14	-0.086175	0.011456	B2	CRHR1;LINC02210-CRHR1	yes
rs41457044	17	43911424	T	C	0.2258	4.23e-08	-0.0534	0.0098	T	C	0.1835	8.98e-09	-0.073973	0.012867	B2	CRHR1;LINC02210-CRHR1	yes
rs1876829	17	43911443	T	C	0.774	4.31e-08	0.0534	0.0097	C	T	0.1835	6.21e-14	-0.08596	0.011456	B2	CRHR1;LINC02210-CRHR1	yes
rs1876828	17	43911525	T	C	0.2259	4.36e-08	-0.0534	0.0098	T	C	0.1827	3.73e-12	-0.085463	0.012302	B2	CRHR1;LINC02210-CRHR1	yes
rs1876827	17	43911832	T	C	0.7741	4.02e-08	0.0535	0.0098	C	T	0.1835	3.9e-14	-0.086637	0.011454	B2	CRHR1;LINC02210-CRHR1	yes
rs16940677	17	43911898	T	C	0.2257	3.39e-08	-0.0539	0.0098	T	C	0.1843	3.86e-14	-0.086673	0.011456	B2	CRHR1;LINC02210-CRHR1	yes
rs16940681	17	43912159	C	G	0.2258	4.18e-08	-0.0535	0.0098	C	G	0.1835	4.35e-14	-0.08649	0.011455	B2	LINC02210-CRHR1	yes
rs28364021	17	43912282	T	C	0.2258	4.04e-08	-0.0535	0.0098	T	C	0.1826	4.71e-12	-0.085079	0.012305	B2	CRHR1;LINC02210-CRHR1	yes
rs2316765	17	43912454	T	C	0.7741	4.17e-08	0.0535	0.0098	C	T	0.1835	5.03e-14	-0.086272	0.011455	B2	CRHR1;LINC02210-CRHR1	yes
rs878886	17	43912490	C	G	0.7741	3.94e-08	0.0536	0.0098	G	C	0.1871	4.68e-14	-0.086365	0.011453	B2	CRHR1;LINC02210-CRHR1	yes
rs878887	17	43912582	T	C	0.2259	4.05e-08	-0.0535	0.0098	T	C	0.1835	4.53e-14	-0.086422	0.011454	B2	CRHR1;LINC02210-CRHR1	yes
rs878888	17	43912635	A	G	0.7741	3.99e-08	0.0535	0.0098	G	A	0.1835	4.4e-14	-0.086474	0.011456	B2	CRHR1;LINC02210-CRHR1	yes
rs4525537	17	43912723	T	C	0.7741	3.98e-08	0.0536	0.0098	C	T	0.1835	5.09e-14	-0.086245	0.011454	B2	CRHR1;LINC02210-CRHR1	yes
rs4640231	17	43912786	C	G	0.2258	3.9e-08	-0.0536	0.0098	C	G	0.1836	5e-14	-0.086277	0.011455	B2	CRHR1;LINC02210-CRHR1	yes
rs4482334	17	43912830	T	C	0.7742	4e-08	0.0536	0.0098	C	T	0.1835	6.17e-14	-0.085968	0.011456	B2	CRHR1;LINC02210-CRHR1	yes
rs56127111	17	43913315	T	C	0.2259	3.76e-08	-0.0536	0.0098	T	C	0.1835	6.03e-14	-0.086017	0.011458	B2	CRHR1;LINC02210-CRHR1	yes
rs75104593	17	43913557	T	G	0.7752	1.88e-08	0.0551	0.0098	G	T	0.1829	5.4e-14	-0.086394	0.011486	B2	CRHR1;LINC02210-CRHR1	yes
rs74998289	17	43913558	T	G	0.7752	1.84e-08	0.0551	0.0098	G	T	0.1828	5.13e-14	-0.086487	0.011488	B2	CRHR1;LINC02210-CRHR1	yes
rs10445362	17	43914554	A	C	0.2259	4.18e-08	-0.0535	0.0098	A	C	0.1835	6.66e-14	-0.085868	0.011458	B2	LINC02210-CRHR1;MAPT-AS1	yes
rs10445363	17	43914558	A	G	0.2258	3.96e-08	-0.0536	0.0098	A	G	0.1834	1.04e-13	-0.085212	0.01146	B2	LINC02210-CRHR1;MAPT-AS1	yes
rs62054802	17	43914598	C	G	0.2259	4.12e-08	-0.0535	0.0098	C	G	0.1835	4.38e-14	-0.086473	0.011455	B2	LINC02210-CRHR1;MAPT-AS1	yes
rs62054803	17	43914728	T	G	0.2258	4.23e-08	-0.0535	0.0098	T	G	0.1835	9.05e-09	-0.073954	0.012867	B2	LINC02210-CRHR1;MAPT-AS1	yes
rs62054804	17	43914809	T	C	0.226	3.42e-08	-0.0538	0.0098	T	C	0.1837	4.42e-14	-0.086458	0.011455	B2	LINC02210-CRHR1;MAPT-AS1	yes
rs62054805	17	43915054	A	G	0.7741	4.12e-08	0.0535	0.0098	G	A	0.1836	4.44e-14	-0.086454	0.011455	B2	LINC02210-CRHR1;MAPT-AS1	yes
rs62054806	17	43915312	T	C	0.2258	4.33e-08	-0.0534	0.0098	T	C	0.1835	5.88e-14	-0.086051	0.011457	B2	LINC02210-CRHR1;MAPT-AS1	yes
rs10445364	17	43916356	A	G	0.2259	4.17e-08	-0.0535	0.0098	A	G	0.1835	7.69e-14	-0.085659	0.011459	B2	LINC02210-CRHR1;MAPT-AS1	yes
rs10445333	17	43916509	A	G	0.7742	4.16e-08	0.0535	0.0098	G	A	0.1835	4.22e-14	-0.086526	0.011454	B2	LINC02210-CRHR1;MAPT-AS1	yes
rs17690176	17	43916773	A	C	0.7741	4.68e-08	0.0533	0.0098	C	A	0.1835	5.77e-14	-0.08606	0.011454	B2	LINC02210-CRHR1;MAPT-AS1	yes
rs78328427	17	43916932	A	G	0.2258	3.73e-08	-0.0537	0.0098	A	G	0.1837	8.8e-14	-0.085417	0.011453	B2	LINC02210-CRHR1;MAPT-AS1	yes
rs77692262	17	43917086	A	G	0.7741	3.52e-08	0.0538	0.0098	G	A	0.1836	8.44e-09	-0.074069	0.012861	B2	LINC02210-CRHR1;MAPT-AS1	yes
rs17763515	17	43917818	A	G	0.2258	4.37e-08	-0.0534	0.0098	A	G	0.1836	9.71e-09	-0.073767	0.012861	B2	LINC02210-CRHR1;MAPT-AS1	yes
rs17763533	17	43918190	T	C	0.7741	4.24e-08	0.0535	0.0098	C	T	0.1828	3.54e-12	-0.085512	0.012296	B2	LINC02210-CRHR1;MAPT-AS1	yes
rs62054809	17	43918239	T	C	0.2258	4.56e-08	-0.0533	0.0098	T	C	0.1836	9.39e-14	-0.085357	0.011459	B2	LINC02210-CRHR1;MAPT-AS1	yes
rs112583797	17	43918418	A	G	0.7741	4.18e-08	0.0535	0.0098	G	A	0.1836	5.01e-14	-0.086245	0.011451	B2	LINC02210-CRHR1;MAPT-AS1	yes
rs74922289	17	43918524	A	G	0.7742	4.14e-08	0.0535	0.0098	G	A	0.1836	4.67e-14	-0.086345	0.01145	B2	LINC02210-CRHR1;MAPT-AS1	yes
rs56971664	17	43918613	T	C	0.7739	3.65e-08	0.0537	0.0098	C	T	0.184	1.07e-08	-0.07354	0.01286	B2	LINC02210-CRHR1;MAPT-AS1	yes
rs62054811	17	43918651	C	G	0.7742	4.16e-08	0.0535	0.0098	G	C	0.1882	6.54e-09	-0.074777	0.012887	B2	LINC02210-CRHR1;MAPT-AS1	yes
rs56150806	17	43919301	T	C	0.7742	4.17e-08	0.0535	0.0098	C	T	0.1836	5.47e-14	-0.086108	0.01145	B2	LINC02210-CRHR1;MAPT-AS1	yes
rs17690314	17	43919884	T	G	0.7741	4.41e-08	0.0534	0.0098	G	T	0.1828	4.51e-12	-0.085088	0.012296	B2	MAPT-AS1	yes
rs56233672	17	43920300	T	C	0.7742	4.07e-08	0.0535	0.0098	C	T	0.1836	8.65e-09	-0.074013	0.01286	B2	MAPT-AS1	yes
rs56354807	17	43920378	T	C	0.2258	4.28e-08	-0.0534	0.0098	T	C	0.1836	8.74e-14	-0.085445	0.011456	B2	MAPT-AS1	yes
rs55718212	17	43920411	T	C	0.7742	4.74e-08	0.0533	0.0098	C	T	0.1836	6.03e-14	-0.085976	0.011452	B2	MAPT-AS1	yes
rs17690326	17	43920974	T	C	0.7741	4.2e-08	0.0535	0.0098	C	T	0.1836	4.67e-14	-0.086359	0.011452	B2	MAPT-AS1	yes
rs17763596	17	43921210	T	G	0.2258	3.91e-08	-0.0536	0.0098	T	G	0.1836	4.99e-14	-0.086243	0.01145	B2	MAPT-AS1	yes
rs62054814	17	43921572	A	T	0.2259	4.08e-08	-0.0535	0.0098	A	T	0.1836	5.36e-14	-0.086136	0.01145	B2	MAPT-AS1	yes
rs17763634	17	43921754	T	C	0.7742	3.51e-08	0.0538	0.0098	C	T	0.1828	3.1e-12	-0.085738	0.012295	B2	MAPT-AS1	yes
rs62621252	17	43922942	T	C	0.7738	4.58e-08	0.0533	0.0098	C	T	0.1842	6.33e-09	-0.074885	0.012894	B2	SPPL2C	yes
rs62054815	17	43923266	A	G	0.2259	3.6e-08	-0.0537	0.0098	A	G	0.1836	6.34e-14	-0.085894	0.011451	B2	SPPL2C	yes
rs12185233	17	43923654	C	G	0.2262	2.48e-08	-0.0544	0.0098	C	G	0.1838	2.72e-14	-0.087205	0.011458	B2	SPPL2C	yes
rs12185268	17	43923683	A	G	0.774	3.85e-08	0.0536	0.0097	G	A	0.1837	2.87e-14	-0.087118	0.011457	B2	SPPL2C	yes
rs12185235	17	43923703	T	C	0.2257	3.08e-08	-0.054	0.0098	T	C	0.1836	3.39e-14	-0.086864	0.011456	B2	SPPL2C	yes
rs11079725	17	43923934	T	C	0.7741	3.9e-08	0.0536	0.0098	C	T	0.1836	9.92e-14	-0.085252	0.011456	B2	SPPL2C	yes
rs12373123	17	43924073	T	C	0.774	3.89e-08	0.0536	0.0098	C	T	0.1836	3.18e-14	-0.086918	0.011451	B2	SPPL2C	yes
rs12373139	17	43924130	A	G	0.226	3.82e-08	-0.0536	0.0097	A	G	0.1836	5.83e-14	-0.086034	0.011453	B2	SPPL2C	yes
rs12373142	17	43924200	C	G	0.7746	3.02e-08	0.0541	0.0098	G	C	0.1868	3.46e-12	-0.085856	0.01234	B2	SPPL2C	yes
rs12373140	17	43924231	A	G	0.2253	2.89e-08	-0.0542	0.0098	A	G	0.1832	5.9e-14	-0.086137	0.011469	B2	SPPL2C	yes
rs17690661	17	43924521	A	G	0.2259	3.93e-08	-0.0536	0.0098	A	G	0.1836	5.71e-14	-0.086054	0.011452	B2	MAPT-AS1	yes
rs55943825	17	43924776	T	C	0.2258	4.01e-08	-0.0536	0.0098	T	C	0.1836	5.69e-14	-0.086058	0.011452	B2	MAPT-AS1	yes
rs17690679	17	43924803	A	G	0.7742	4.02e-08	0.0536	0.0098	G	A	0.1828	3.68e-12	-0.085457	0.012297	B2	MAPT-AS1	yes
rs62054820	17	43926755	A	G	0.7738	4.75e-08	0.0532	0.0097	G	A	0.1842	5.68e-14	-0.085944	0.011436	B2	MAPT-AS1	yes
rs56113217	17	43926948	A	G	0.774	4.7e-08	0.0532	0.0097	G	A	0.1841	4.3e-14	-0.086365	0.011437	B2	MAPT-AS1	yes
rs56269136	17	43926992	T	C	0.2261	4.32e-08	-0.0533	0.0097	T	C	0.1842	9.3e-09	-0.073797	0.01285	B2	MAPT-AS1	yes
rs62054824	17	43929992	T	C	0.2258	3.97e-08	-0.0536	0.0098	T	C	0.1837	7.23e-14	-0.085725	0.011455	B2	MAPT-AS1	yes
rs62054825	17	43930033	A	G	0.2259	3.89e-08	-0.0536	0.0098	A	G	0.1836	5.31e-14	-0.086181	0.011454	B2	MAPT-AS1	yes
rs79589869	17	43930238	A	C	0.2258	3.66e-08	-0.0538	0.0098	A	C	0.1836	7.23e-14	-0.085725	0.011455	B2	MAPT-AS1	yes
rs2316769	17	43930798	A	G	0.7741	3.76e-08	0.0537	0.0098	G	A	0.1837	5.58e-14	-0.08609	0.011452	B2	MAPT-AS1	yes
rs2873268	17	43930955	A	G	0.2258	3.86e-08	-0.0537	0.0098	A	G	0.1836	6.61e-14	-0.085871	0.011457	B2	MAPT-AS1	yes
rs4340365	17	43930980	T	C	0.2258	3.57e-08	-0.0538	0.0098	T	C	0.1836	6.19e-14	-0.085974	0.011457	B2	MAPT-AS1	yes
rs2873269	17	43931122	T	C	0.2259	3.78e-08	-0.0537	0.0098	T	C	0.1829	5.17e-12	-0.084882	0.0123	B2	MAPT-AS1	yes
rs56026128	17	43931244	C	G	0.2258	4.15e-08	-0.0535	0.0098	C	G	0.1836	5.94e-14	-0.086013	0.011454	B2	MAPT-AS1	yes
rs56329743	17	43931245	A	G	0.2258	3.94e-08	-0.0536	0.0098	A	G	0.1837	6.3e-14	-0.085914	0.011453	B2	MAPT-AS1	yes
rs56288604	17	43931380	A	G	0.7741	3.62e-08	0.0538	0.0098	G	A	0.1837	6.18e-14	-0.085934	0.011452	B2	MAPT-AS1	yes
rs17690987	17	43931626	T	C	0.7741	3.36e-08	0.0539	0.0098	C	T	0.1829	4.07e-12	-0.085274	0.012297	B2	MAPT-AS1	yes
rs56146262	17	43931907	A	C	0.2258	3.64e-08	-0.0538	0.0098	A	C	0.1836	1.1e-13	-0.085128	0.01146	B2	MAPT-AS1	yes
rs55942528	17	43932028	A	G	0.7739	3.48e-08	0.0538	0.0098	G	A	0.1838	6.18e-14	-0.085965	0.011456	B2	MAPT-AS1	yes
rs56254732	17	43932049	T	C	0.2259	2.89e-08	-0.0542	0.0098	T	C	0.1837	6.71e-14	-0.085857	0.011458	B2	MAPT-AS1	yes
rs56323304	17	43932129	T	C	0.2266	4.27e-08	-0.0535	0.0098	T	C	0.184	1.05e-08	-0.073577	0.012857	B2	MAPT-AS1	yes
rs55751924	17	43932155	A	G	0.7742	4e-08	0.0536	0.0098	G	A	0.2052	1.51e-08	-0.073354	0.01296	B2	MAPT-AS1	yes
rs113856644	17	43932277	A	G	0.2259	4.06e-08	-0.0536	0.0098	A	G	0.1837	9.54e-14	-0.08531	0.011456	B2	MAPT-AS1	yes
rs62054831	17	43932381	T	C	0.2256	3.69e-08	-0.0538	0.0098	T	C	0.205	2.18e-08	-0.072556	0.012962	B2	MAPT-AS1	yes
rs4627402	17	43932741	T	C	0.2214	2.64e-08	-0.055	0.0099	T	C	0.1785	7.67e-14	-0.086659	0.011592	B2	MAPT-AS1	yes
rs62054833	17	43933673	T	C	0.774	3.68e-08	0.0537	0.0098	C	T	0.1837	9.36e-14	-0.085305	0.011451	B2	MAPT-AS1	yes
rs76563578	17	43933879	C	G	0.774	4.28e-08	0.0535	0.0098	G	C	0.1873	8.01e-14	-0.085537	0.011451	B2	MAPT-AS1	yes
rs62054834	17	43934314	T	C	0.7739	3.77e-08	0.0537	0.0098	C	T	0.1837	8.48e-14	-0.08545	0.01145	B2	MAPT-AS1	yes
rs62054835	17	43934672	A	C	0.774	3.54e-08	0.0538	0.0098	C	A	0.1837	9.42e-14	-0.085291	0.01145	B2	MAPT-AS1	yes
rs10445369	17	43934776	A	G	0.774	3.63e-08	0.0538	0.0098	G	A	0.1836	1.17e-13	-0.084984	0.011453	B2	MAPT-AS1	yes
rs10445334	17	43934826	T	G	0.774	3.56e-08	0.0538	0.0098	G	T	0.1837	8.72e-14	-0.085404	0.01145	B2	MAPT-AS1	yes
rs10445335	17	43934896	A	T	0.226	3.47e-08	-0.0538	0.0098	A	T	0.184	9.13e-09	-0.074057	0.012888	B2	MAPT-AS1	yes
rs10445336	17	43934948	A	G	0.774	3.57e-08	0.0538	0.0098	G	A	0.1837	8.69e-14	-0.085413	0.01145	B2	MAPT-AS1	yes
rs10445370	17	43935118	A	G	0.226	3.73e-08	-0.0537	0.0098	A	G	0.1837	9.26e-14	-0.085329	0.011452	B2	MAPT-AS1	yes
rs55996632	17	43935888	T	C	0.226	3.41e-08	-0.0539	0.0098	T	C	0.1837	8.65e-14	-0.085441	0.011453	B2	MAPT-AS1	yes
rs55886302	17	43936011	A	G	0.774	3.56e-08	0.0538	0.0098	G	A	0.1837	9.37e-14	-0.085294	0.01145	B2	MAPT-AS1	yes
rs56136075	17	43936298	A	C	0.226	3.56e-08	-0.0538	0.0098	A	C	0.1837	1.15e-13	-0.084978	0.01145	B2	MAPT-AS1	yes
rs62054841	17	43937104	A	G	0.226	3.66e-08	-0.0537	0.0098	A	G	0.1837	9.71e-14	-0.085246	0.01145	B2	MAPT-AS1	yes
rs62054842	17	43937162	T	C	0.226	3.93e-08	-0.0536	0.0098	T	C	0.184	9.8e-14	-0.085238	0.011451	B2	MAPT-AS1	yes
rs62054843	17	43937184	T	C	0.7739	3.48e-08	0.0538	0.0098	C	T	0.1837	1.05e-13	-0.085119	0.01145	B2	MAPT-AS1	yes
rs62054844	17	43937333	T	G	0.774	3.76e-08	0.0537	0.0098	G	T	0.1837	9.15e-14	-0.085334	0.01145	B2	MAPT-AS1	yes
rs76627340	17	43937460	A	G	0.226	3.86e-08	-0.0536	0.0098	A	G	0.184	5.55e-14	-0.086218	0.011468	B2	MAPT-AS1	yes
rs75945623	17	43937505	T	C	0.2261	3.42e-08	-0.0539	0.0098	T	C	0.1837	9.68e-14	-0.085248	0.01145	B2	MAPT-AS1	yes
rs79889833	17	43937633	A	G	0.774	3.79e-08	0.0537	0.0098	G	A	0.1837	9.3e-14	-0.085307	0.01145	B2	MAPT-AS1	yes
rs77625338	17	43937671	T	C	0.226	3.8e-08	-0.0537	0.0098	T	C	0.1837	1.36e-08	-0.073067	0.012866	B2	MAPT-AS1	yes
rs77489223	17	43937736	T	C	0.226	3.81e-08	-0.0537	0.0098	T	C	0.1837	8.79e-14	-0.08539	0.011449	B2	MAPT-AS1	yes
rs55888391	17	43938107	A	G	0.774	3.69e-08	0.0537	0.0098	G	A	0.1837	8.84e-14	-0.085387	0.01145	B2	MAPT-AS1	yes
rs76329216	17	43938499	A	G	0.226	3.61e-08	-0.0538	0.0098	A	G	0.1837	9.01e-14	-0.085354	0.01145	B2	MAPT-AS1	yes
rs62054846	17	43938634	A	G	0.774	3.9e-08	0.0536	0.0098	G	A	0.1837	8.09e-14	-0.085512	0.011449	B2	MAPT-AS1	yes
rs55646970	17	43938796	A	G	0.774	3.77e-08	0.0537	0.0098	G	A	0.184	5.82e-14	-0.086144	0.011468	B2	MAPT-AS1	yes
rs55673092	17	43938882	A	G	0.226	3.63e-08	-0.0538	0.0098	A	G	0.1837	1.23e-08	-0.073248	0.012862	B2	MAPT-AS1	yes
rs56347602	17	43939255	T	C	0.774	3.63e-08	0.0538	0.0098	C	T	0.1837	8.76e-14	-0.085398	0.01145	B2	MAPT-AS1	yes
rs56249080	17	43939432	T	G	0.226	3.61e-08	-0.0538	0.0098	T	G	0.1907	8.47e-13	-0.082348	0.011512	B2	MAPT-AS1	yes
rs56227067	17	43939609	A	T	0.7741	3.87e-08	0.0537	0.0098	T	A	0.1872	7.56e-14	-0.085643	0.011453	B2	MAPT-AS1	yes
rs55719714	17	43939638	A	G	0.226	3.67e-08	-0.0538	0.0098	A	G	0.1836	7.89e-14	-0.08557	0.011452	B2	MAPT-AS1	yes
rs56299858	17	43939659	A	G	0.226	3.85e-08	-0.0537	0.0098	A	G	0.1836	7.46e-14	-0.085655	0.011452	B2	MAPT-AS1	yes
rs62054857	17	43939936	A	G	0.226	3.66e-08	-0.0538	0.0098	A	G	0.1837	9.69e-14	-0.08525	0.011451	B2	MAPT-AS1	yes
rs62054858	17	43940188	T	C	0.774	3.94e-08	0.0536	0.0098	C	T	0.1837	7.93e-14	-0.085542	0.011449	B2	MAPT-AS1	yes
rs79406732	17	43940497	T	C	0.2258	3.18e-08	-0.054	0.0098	T	C	0.1836	1.26e-13	-0.084867	0.011453	B2	MAPT-AS1	yes
rs62054859	17	43940685	A	G	0.226	3.94e-08	-0.0536	0.0098	A	G	0.184	6.07e-14	-0.086085	0.011468	B2	MAPT-AS1	yes
rs62055460	17	43940825	C	G	0.226	3.65e-08	-0.0538	0.0098	C	G	0.184	5.63e-14	-0.086191	0.011467	B2	MAPT-AS1	yes
rs62055461	17	43941350	T	C	0.226	3.54e-08	-0.0538	0.0098	T	C	0.1837	8.1e-14	-0.085526	0.011451	B2	MAPT-AS1	yes
rs62055462	17	43941476	A	C	0.774	3.55e-08	0.0538	0.0098	C	A	0.1837	9.79e-14	-0.085246	0.011452	B2	MAPT-AS1	yes
rs62055463	17	43941491	A	G	0.774	3.52e-08	0.0538	0.0098	G	A	0.1837	8.9e-14	-0.085384	0.011451	B2	MAPT-AS1	yes
rs77652965	17	43941608	C	G	0.774	3.59e-08	0.0538	0.0098	G	C	0.1873	8.87e-14	-0.085373	0.011449	B2	MAPT-AS1	yes
rs75690239	17	43941710	T	C	0.226	3.36e-08	-0.0539	0.0098	T	C	0.1837	1.02e-13	-0.085183	0.011451	B2	MAPT-AS1	yes
rs62055464	17	43941858	T	G	0.774	3.68e-08	0.0537	0.0098	G	T	0.1837	7.95e-14	-0.085543	0.01145	B2	MAPT-AS1	yes
rs62055465	17	43942046	A	T	0.226	3.7e-08	-0.0537	0.0098	A	T	0.1837	1.08e-13	-0.085093	0.011451	B2	MAPT-AS1	yes
rs62055466	17	43942656	A	G	0.226	3.66e-08	-0.0538	0.0098	A	G	0.1837	1.01e-13	-0.085181	0.01145	B2	MAPT-AS1	yes
rs62055467	17	43942820	T	C	0.774	3.72e-08	0.0537	0.0098	C	T	0.1837	7.42e-14	-0.085641	0.011449	B2	MAPT-AS1	yes
rs62055468	17	43943000	A	C	0.774	3.85e-08	0.0537	0.0098	C	A	0.1837	8.97e-14	-0.085354	0.011449	B2	MAPT-AS1	yes
rs62055469	17	43943655	A	C	0.774	4.02e-08	0.0536	0.0098	C	A	0.1837	9.77e-14	-0.085232	0.01145	B2	MAPT-AS1	yes
rs62055470	17	43943657	A	G	0.774	4.04e-08	0.0536	0.0098	G	A	0.1837	1.03e-13	-0.085157	0.01145	B2	MAPT-AS1	yes
rs62055471	17	43943755	T	C	0.774	3.86e-08	0.0537	0.0098	C	T	0.1837	7.22e-14	-0.085672	0.011448	B2	MAPT-AS1	yes
rs56327054	17	43943957	C	G	0.226	3.76e-08	-0.0537	0.0098	C	G	0.1837	1.21e-08	-0.073287	0.012861	B2	MAPT-AS1	yes
rs56036719	17	43943974	T	C	0.226	3.64e-08	-0.0538	0.0098	T	C	0.1837	9.86e-14	-0.085222	0.01145	B2	MAPT-AS1	yes
rs55781174	17	43944158	T	C	0.226	3.62e-08	-0.0538	0.0098	T	C	0.1837	8.33e-14	-0.085466	0.011449	B2	MAPT-AS1	yes
rs12150223	17	43944204	T	C	0.774	3.47e-08	0.0539	0.0098	C	T	0.1837	8.18e-14	-0.085493	0.011449	B2	MAPT-AS1	yes
rs12150516	17	43944519	T	C	0.226	3.64e-08	-0.0538	0.0098	T	C	0.1837	1.03e-13	-0.085158	0.01145	B2	MAPT-AS1	yes
rs62055475	17	43945106	T	C	0.774	3.57e-08	0.0538	0.0098	C	T	0.1837	8.81e-14	-0.085383	0.011449	B2	MAPT-AS1	yes
rs62055476	17	43945495	A	G	0.774	3.3e-08	0.0539	0.0098	G	A	0.1837	8.35e-14	-0.085465	0.011449	B2	MAPT-AS1	yes
rs62055477	17	43945687	A	C	0.226	3.39e-08	-0.0539	0.0098	A	C	0.1819	1.01e-13	-0.085472	0.011489	B2	MAPT-AS1	yes
rs78637438	17	43945855	A	G	0.2259	3.75e-08	-0.0537	0.0098	A	G	0.1837	8.92e-14	-0.085367	0.011449	B2	MAPT-AS1	yes
rs2316771	17	43945931	T	C	0.7741	3.63e-08	0.0538	0.0098	C	T	0.1837	1.07e-13	-0.085089	0.01145	B2	MAPT-AS1	yes
rs62055478	17	43945938	T	C	0.2259	3.62e-08	-0.0538	0.0098	T	C	0.1837	1.37e-13	-0.084728	0.011451	B2	MAPT-AS1	yes
rs1078830	17	43946112	T	C	0.774	3.66e-08	0.0538	0.0098	C	T	0.1828	8.71e-12	-0.084018	0.012308	B2	MAPT-AS1	yes
rs753236	17	43946318	T	C	0.772	2.01e-08	0.0549	0.0098	C	T	0.1842	1.48e-13	-0.084842	0.011482	B2	MAPT-AS1	yes
rs2316772	17	43946423	A	C	0.774	4.67e-08	0.0534	0.0098	C	A	0.1835	7.65e-09	-0.074386	0.012878	B2	MAPT-AS1	yes
rs2316773	17	43946536	T	C	0.226	2.49e-08	-0.0544	0.0098	T	C	0.1837	1.62e-13	-0.084475	0.011451	B2	MAPT-AS1	yes
rs2316774	17	43946642	T	C	0.7739	3.11e-08	0.0541	0.0098	C	T	0.1837	9.21e-14	-0.085337	0.011452	B2	MAPT-AS1	yes
rs739643	17	43946707	T	C	0.7738	3.38e-08	0.0539	0.0098	C	T	0.1909	1.06e-12	-0.08198	0.011509	B2	MAPT-AS1	yes
rs739642	17	43946838	A	C	0.226	3.03e-08	-0.0541	0.0098	A	C	0.1836	1.92e-13	-0.084291	0.011462	B2	MAPT-AS1	yes
rs757055	17	43946875	T	C	0.2259	3.22e-08	-0.054	0.0098	T	C	0.1836	2.2e-13	-0.084091	0.011463	B2	MAPT-AS1	yes
rs56398500	17	43947488	A	G	0.7741	2.96e-08	0.0541	0.0098	G	A	0.1837	9.61e-14	-0.085261	0.01145	B2	MAPT-AS1	yes
rs56289364	17	43947928	A	G	0.774	3.17e-08	0.054	0.0098	G	A	0.1837	8.28e-14	-0.085477	0.011449	B2	MAPT-AS1	yes
rs62055483	17	43948040	T	C	0.226	2.99e-08	-0.0541	0.0098	T	C	0.1837	1.18e-13	-0.08496	0.011452	B2	MAPT-AS1	yes
rs78238042	17	43948159	A	G	0.226	3.03e-08	-0.0541	0.0098	A	G	0.1837	1.03e-13	-0.085158	0.01145	B2	MAPT-AS1	yes
rs55673340	17	43948733	T	C	0.2259	3.36e-08	-0.0539	0.0098	T	C	0.1837	1.33e-13	-0.084788	0.011453	B2	MAPT-AS1	yes
rs77092481	17	43949008	T	C	0.2258	3.53e-08	-0.0539	0.0098	T	C	0.184	1.14e-13	-0.085197	0.011477	B2	MAPT-AS1	yes
rs62055486	17	43949092	T	G	0.7741	3.16e-08	0.054	0.0098	G	T	0.1837	8.81e-14	-0.085397	0.011451	B2	MAPT-AS1	yes
rs34739559	17	43949342	A	G	0.2253	2.49e-08	-0.0548	0.0098	A	G	0.1832	8.95e-14	-0.085696	0.011494	B2	MAPT-AS1	yes
rs34097347	17	43949448	A	C	0.2233	2.03e-08	-0.0553	0.0099	A	C	0.1825	1.75e-08	-0.072945	0.012945	B2	MAPT-AS1	yes
rs2106784	17	43949892	T	C	0.226	3.1e-08	-0.0541	0.0098	T	C	0.1837	7.83e-14	-0.085562	0.011449	B2	MAPT-AS1	yes
rs2158072	17	43950195	T	C	0.7741	3.03e-08	0.0541	0.0098	C	T	0.1837	1.09e-13	-0.085062	0.01145	B2	MAPT-AS1	yes
rs62055488	17	43950394	T	C	0.2259	2.62e-08	-0.0543	0.0098	T	C	0.184	9.88e-09	-0.07388	0.012887	B2	MAPT-AS1	yes
rs62055490	17	43950533	A	G	0.7741	2.81e-08	0.0542	0.0098	G	A	0.1837	1.32e-13	-0.084792	0.011451	B2	MAPT-AS1	yes
rs10491140	17	43950976	T	G	0.2265	2.35e-08	-0.0545	0.0098	T	G	0.1896	7.46e-11	-0.080972	0.012436	B2	MAPT-AS1	yes
rs62055491	17	43951120	T	C	0.774	2.42e-08	0.0545	0.0098	C	T	0.1837	1.06e-13	-0.085095	0.011448	B2	MAPT-AS1	yes
rs34416056	17	43951220	T	G	0.774	2.57e-08	0.0544	0.0098	G	T	0.1837	1.13e-13	-0.084998	0.011449	B2	MAPT-AS1	yes
rs62055492	17	43951345	A	C	0.226	2.78e-08	-0.0542	0.0098	A	C	0.184	7.24e-14	-0.085818	0.011468	B2	MAPT-AS1	yes
rs2055794	17	43951717	A	G	0.2259	2.18e-08	-0.0547	0.0098	A	G	0.1837	1.01e-13	-0.085171	0.011449	B2	MAPT-AS1	yes
rs2055795	17	43951995	T	C	0.2259	2.2e-08	-0.0546	0.0098	T	C	0.1837	1.31e-13	-0.084802	0.011452	B2	MAPT-AS1	yes
rs2055796	17	43952191	A	T	0.7741	2.21e-08	0.0546	0.0098	T	A	0.1873	1.16e-13	-0.084969	0.011449	B2	MAPT-AS1	yes
rs62055493	17	43952944	T	C	0.774	2.58e-08	0.0544	0.0098	C	T	0.1836	3.67e-08	-0.071142	0.012921	B2	MAPT-AS1	yes
rs62055494	17	43953016	T	C	0.2259	2.33e-08	-0.0546	0.0098	T	C	0.1836	1.57e-08	-0.072719	0.012861	B2	MAPT-AS1	yes
rs62055495	17	43953043	A	C	0.774	2.63e-08	0.0544	0.0098	C	A	0.1837	1.66e-08	-0.072709	0.012881	B2	MAPT-AS1	yes
rs62055496	17	43953307	T	C	0.2259	2.21e-08	-0.0546	0.0098	T	C	0.1837	1.15e-13	-0.084989	0.011451	B2	MAPT-AS1	yes
rs62055497	17	43953529	A	G	0.7741	2.36e-08	0.0545	0.0098	G	A	0.1837	1.1e-13	-0.085046	0.011448	B2	MAPT-AS1	yes
rs2188888	17	43953695	T	C	0.7746	2.74e-08	0.0544	0.0098	C	T	0.1833	1.99e-13	-0.084331	0.011475	B2	MAPT-AS1	yes
rs3919455	17	43953707	T	C	0.2254	2.54e-08	-0.0545	0.0098	T	C	0.1833	1.44e-08	-0.073058	0.012889	B2	MAPT-AS1	yes
rs2214258	17	43953719	C	G	0.2254	2.55e-08	-0.0545	0.0098	C	G	0.1833	1.43e-13	-0.084808	0.011471	B2	MAPT-AS1	yes
rs62055498	17	43953814	A	G	0.226	2.58e-08	-0.0544	0.0098	A	G	0.1837	1.03e-13	-0.085139	0.011448	B2	MAPT-AS1	yes
rs62055499	17	43953991	C	G	0.774	2.6e-08	0.0544	0.0098	G	C	0.1873	1.16e-13	-0.084957	0.011448	B2	MAPT-AS1	yes
rs62055500	17	43954134	A	G	0.226	2.62e-08	-0.0543	0.0098	A	G	0.1837	1.17e-13	-0.084961	0.011451	B2	MAPT-AS1	yes
rs62055501	17	43954227	A	G	0.2259	2.66e-08	-0.0543	0.0098	A	G	0.1837	1.43e-13	-0.084656	0.01145	B2	MAPT-AS1	yes
rs62055502	17	43954284	A	G	0.2259	2.7e-08	-0.0543	0.0098	A	G	0.1836	1.23e-13	-0.084882	0.011449	B2	MAPT-AS1	yes
rs916793	17	43954686	A	G	0.226	2.28e-08	-0.0546	0.0098	A	G	0.1837	1.37e-13	-0.08472	0.011449	B2	MAPT-AS1	yes
rs4441322	17	43955030	A	G	0.7741	2.53e-08	0.0544	0.0098	G	A	0.1837	1.13e-13	-0.085	0.011449	B2	MAPT-AS1	yes
rs113414067	17	43955093	T	C	0.774	2.61e-08	0.0544	0.0098	C	T	0.1837	1e-13	-0.085179	0.011448	B2	MAPT-AS1	yes
rs55905252	17	43955365	A	C	0.226	2.6e-08	-0.0544	0.0098	A	C	0.1837	1.11e-13	-0.085024	0.011449	B2	MAPT-AS1	yes
rs17691328	17	43955487	T	C	0.2265	4.37e-08	-0.0534	0.0098	T	C	0.184	1.86e-08	-0.0723	0.012853	B2	MAPT-AS1	yes
rs62055515	17	43956370	T	G	0.2259	2.8e-08	-0.0542	0.0098	T	G	0.1836	1.63e-08	-0.072639	0.012862	B2	MAPT-AS1	yes
rs62055516	17	43956390	T	C	0.7741	2.92e-08	0.0542	0.0098	C	T	0.1836	1.6e-08	-0.072673	0.012862	B2	MAPT-AS1	yes
rs62055517	17	43956425	T	C	0.2259	2.65e-08	-0.0543	0.0098	T	C	0.1836	1.53e-13	-0.084594	0.011456	B2	MAPT-AS1	yes
rs62055518	17	43956505	A	C	0.7741	2.88e-08	0.0542	0.0098	C	A	0.1836	1.1e-13	-0.085069	0.011452	B2	MAPT-AS1	yes
rs56364632	17	43956642	T	C	0.7741	2.78e-08	0.0543	0.0098	C	T	0.1836	1.27e-13	-0.084838	0.01145	B2	MAPT-AS1	yes
rs55768605	17	43956734	A	C	0.2261	2.62e-08	-0.0544	0.0098	A	C	0.1837	1.47e-13	-0.084704	0.011462	B2	MAPT-AS1	yes
rs55653657	17	43956778	A	G	0.7741	2.9e-08	0.0542	0.0098	G	A	0.1828	9.74e-12	-0.083724	0.012294	B2	MAPT-AS1	yes
rs55894109	17	43957221	T	C	0.226	2.58e-08	-0.0544	0.0098	T	C	0.1837	1.29e-13	-0.084816	0.01145	B2	MAPT-AS1	yes
rs56101773	17	43957269	T	C	0.774	2.74e-08	0.0543	0.0098	C	T	0.1837	1.66e-08	-0.072699	0.012881	B2	MAPT-AS1	yes
rs56249780	17	43957328	T	C	0.226	2.51e-08	-0.0544	0.0098	T	C	0.1837	1.3e-13	-0.084815	0.011452	B2	MAPT-AS1	yes
rs55721252	17	43958099	T	C	0.7741	2.7e-08	0.0543	0.0098	C	T	0.1839	1.06e-13	-0.08527	0.011471	B2	MAPT-AS1	yes
rs55876817	17	43958139	A	C	0.7741	2.9e-08	0.0542	0.0098	C	A	0.1836	1.37e-13	-0.084747	0.011453	B2	MAPT-AS1	yes
rs55944735	17	43958172	A	G	0.774	2.83e-08	0.0542	0.0098	G	A	0.1837	1.16e-13	-0.084985	0.011452	B2	MAPT-AS1	yes
rs62055525	17	43958736	A	G	0.2258	1.91e-08	-0.0549	0.0098	A	G	0.1836	1.55e-08	-0.072754	0.012864	B2	MAPT-AS1	yes
rs112915466	17	43958744	A	G	0.7742	1.87e-08	0.055	0.0098	G	A	0.1836	1.58e-08	-0.072724	0.012864	B2	MAPT-AS1	yes
rs56343551	17	43959092	T	G	0.2259	2.1e-08	-0.0547	0.0098	T	G	0.1837	1.54e-08	-0.07275	0.012861	B2	MAPT-AS1	yes
rs55975673	17	43959113	A	G	0.7741	2.24e-08	0.0546	0.0098	G	A	0.1837	1.51e-08	-0.072799	0.012861	B2	MAPT-AS1	yes
rs56387391	17	43959261	A	G	0.2259	2.7e-08	-0.0543	0.0098	A	G	0.184	1.13e-08	-0.073569	0.012886	B2	MAPT-AS1	yes
rs2019816	17	43959661	A	G	0.2259	2.6e-08	-0.0544	0.0098	A	G	0.2051	1.96e-08	-0.072724	0.01295	B2	MAPT-AS1	yes
rs2006305	17	43959752	A	T	0.7741	2.68e-08	0.0543	0.0098	T	A	0.1873	1.3e-13	-0.084818	0.011452	B2	MAPT-AS1	yes
rs2019822	17	43959918	A	T	0.226	2.69e-08	-0.0543	0.0098	A	T	0.1837	1.57e-08	-0.072709	0.01286	B2	MAPT-AS1	yes
rs62055529	17	43960020	A	G	0.7741	2.73e-08	0.0543	0.0098	G	A	0.184	1.18e-13	-0.08511	0.011472	B2	MAPT-AS1	yes
rs79580365	17	43960172	T	C	0.226	2.73e-08	-0.0543	0.0098	T	C	0.1837	1.1e-13	-0.085054	0.011451	B2	MAPT-AS1	yes
rs55937610	17	43960283	A	G	0.7741	2.67e-08	0.0543	0.0098	G	A	0.1835	1.04e-13	-0.085171	0.011454	B2	MAPT-AS1	yes
rs56365901	17	43960323	A	G	0.7749	3.89e-08	0.0539	0.0098	G	A	0.1829	8.72e-09	-0.074234	0.012901	B2	MAPT-AS1	yes
rs55767267	17	43960325	T	C	0.7749	3.9e-08	0.0538	0.0098	C	T	0.1829	8.48e-09	-0.074293	0.012901	B2	MAPT-AS1	yes
rs56127309	17	43960341	A	G	0.2251	3.9e-08	-0.0538	0.0098	A	G	0.183	7.23e-09	-0.074631	0.0129	B2	MAPT-AS1	yes
rs56194412	17	43960600	T	C	0.7741	2.78e-08	0.0543	0.0098	C	T	0.1837	1.11e-13	-0.085028	0.011449	B2	MAPT-AS1	yes
rs56338487	17	43960812	A	T	0.7741	2.73e-08	0.0543	0.0098	T	A	0.1882	8.55e-14	-0.08556	0.011467	B2	MAPT-AS1	yes
rs56180212	17	43960911	A	G	0.7734	4.8e-08	0.0533	0.0098	G	A	0.1841	1.41e-13	-0.084655	0.011447	B2	MAPT-AS1	yes
rs56301449	17	43960918	T	C	0.7741	2.64e-08	0.0544	0.0098	C	T	0.1837	1.53e-13	-0.084568	0.011452	B2	MAPT-AS1	yes
rs62055538	17	43960997	T	C	0.774	2.97e-08	0.0541	0.0098	C	T	0.1837	9.98e-14	-0.085193	0.011449	B2	MAPT-AS1	yes
rs62055539	17	43961044	A	G	0.7741	2.67e-08	0.0543	0.0098	G	A	0.1837	9.24e-14	-0.085313	0.011449	B2	MAPT-AS1	yes
rs62055540	17	43961142	T	C	0.7741	2.69e-08	0.0543	0.0098	C	T	0.1837	1.05e-13	-0.085114	0.011448	B2	MAPT-AS1	yes
rs17770108	17	43961292	T	G	0.2259	2.69e-08	-0.0543	0.0098	T	G	0.1829	8.89e-12	-0.083888	0.012294	B2	MAPT-AS1	yes
rs62055541	17	43962017	C	G	0.2259	2.71e-08	-0.0543	0.0098	C	G	0.1837	1.31e-13	-0.084783	0.011449	B2	MAPT-AS1	yes
rs77426526	17	43962982	A	G	0.226	2.98e-08	-0.0541	0.0098	A	G	0.1836	9.76e-14	-0.085276	0.011456	B2	MAPT-AS1	yes
rs77129180	17	43963046	A	G	0.2259	2.66e-08	-0.0543	0.0098	A	G	0.1837	9.93e-14	-0.085199	0.011449	B2	MAPT-AS1	yes
rs74863825	17	43963120	T	C	0.2259	2.28e-08	-0.0546	0.0098	T	C	0.1837	9.39e-14	-0.085293	0.01145	B2	MAPT-AS1	yes
rs80254317	17	43963282	C	G	0.7741	2.84e-08	0.0542	0.0098	G	C	0.222	1.01e-12	-0.082374	0.011555	B2	MAPT-AS1	yes
rs112425426	17	43963416	C	G	0.7741	2.68e-08	0.0543	0.0098	G	C	0.1873	1.32e-08	-0.073094	0.012861	B2	MAPT-AS1	yes
rs62055542	17	43963844	T	C	0.2259	2.58e-08	-0.0544	0.0098	T	C	0.1837	9.77e-14	-0.085223	0.011448	B2	MAPT-AS1	yes
rs17770120	17	43963943	A	C	0.2259	2.7e-08	-0.0543	0.0098	A	C	0.1837	9.31e-14	-0.085295	0.011448	B2	MAPT-AS1	yes
rs17770150	17	43964163	A	G	0.2259	2.71e-08	-0.0543	0.0098	A	G	0.1836	9.83e-14	-0.085254	0.011454	B2	MAPT-AS1	yes
rs17770186	17	43964191	A	C	0.2254	2.83e-08	-0.0543	0.0098	A	C	0.1835	2.19e-13	-0.084122	0.011466	B2	MAPT-AS1	yes
rs17691449	17	43964283	C	G	0.2259	2.7e-08	-0.0543	0.0098	C	G	0.1838	8.13e-14	-0.085671	0.011471	B2	MAPT-AS1	yes
rs62055544	17	43964539	A	G	0.7732	4.16e-08	0.0536	0.0098	G	A	0.1843	2.34e-13	-0.083906	0.011451	B2	MAPT-AS1	yes
rs62055545	17	43964561	T	C	0.2258	2.49e-08	-0.0546	0.0098	T	C	0.1835	5.45e-13	-0.082798	0.011478	B2	MAPT-AS1	yes
rs62055546	17	43964567	A	C	0.7751	2.7e-08	0.0545	0.0098	C	A	0.1829	1.95e-13	-0.084437	0.011485	B2	MAPT-AS1	yes
rs62055547	17	43964755	T	C	0.2259	2.68e-08	-0.0543	0.0098	T	C	0.1837	1.15e-13	-0.08499	0.01145	B2	MAPT-AS1	yes
rs62055548	17	43964899	A	G	0.7741	2.67e-08	0.0543	0.0098	G	A	0.1837	1.2e-13	-0.084907	0.011448	B2	MAPT-AS1	yes
rs113327263	17	43965063	T	C	0.7741	2.77e-08	0.0543	0.0098	C	T	0.1837	1.02e-13	-0.085143	0.011447	B2	MAPT-AS1	yes
rs62055549	17	43965595	C	G	0.2259	2.7e-08	-0.0543	0.0098	C	G	0.184	7.39e-14	-0.085783	0.011467	B2	MAPT-AS1	yes
rs62055550	17	43965680	A	G	0.226	3.32e-08	-0.054	0.0098	A	G	0.1838	1.46e-13	-0.08462	0.011449	B2	MAPT-AS1	yes
rs62055551	17	43965687	C	G	0.774	3.37e-08	0.0539	0.0098	G	C	0.1874	1.4e-13	-0.084682	0.011449	B2	MAPT-AS1	yes
rs62055552	17	43965955	A	G	0.7741	2.7e-08	0.0543	0.0098	G	A	0.1837	9.71e-14	-0.085219	0.011447	B2	MAPT-AS1	yes
rs62055553	17	43966178	A	C	0.2259	2.73e-08	-0.0543	0.0098	A	C	0.1837	9.52e-14	-0.08526	0.011448	B2	MAPT-AS1	yes
rs62055554	17	43966260	A	G	0.7741	2.7e-08	0.0543	0.0098	G	A	0.1837	9.69e-14	-0.085221	0.011447	B2	MAPT-AS1	yes
rs62055555	17	43966282	T	G	0.2259	2.7e-08	-0.0543	0.0098	T	G	0.1837	1.43e-08	-0.072901	0.012859	B2	MAPT-AS1	yes
rs111941646	17	43966608	A	T	0.7741	2.73e-08	0.0543	0.0098	T	A	0.1873	9.41e-14	-0.085265	0.011447	B2	MAPT-AS1	yes
rs62055556	17	43966749	T	C	0.7741	2.72e-08	0.0543	0.0098	C	T	0.1837	1.35e-08	-0.073034	0.012859	B2	MAPT-AS1	yes
rs62055557	17	43966795	A	C	0.2259	2.71e-08	-0.0543	0.0098	A	C	0.184	7.95e-14	-0.085513	0.011446	B2	MAPT-AS1	yes
rs62055558	17	43966955	A	G	0.7741	2.71e-08	0.0543	0.0098	G	A	0.1837	1.03e-13	-0.085133	0.011447	B2	MAPT-AS1	yes
rs62055559	17	43967138	T	G	0.7741	2.93e-08	0.0542	0.0098	G	T	0.1837	1.02e-13	-0.085156	0.011448	B2	MAPT-AS1	yes
rs79193046	17	43967562	T	C	0.7744	3.32e-08	0.054	0.0098	C	T	0.1836	1.45e-08	-0.072906	0.012865	B2	MAPT-AS1	yes
rs17691466	17	43968219	A	G	0.7741	2.71e-08	0.0543	0.0098	G	A	0.1837	8.62e-14	-0.085399	0.011447	B2	MAPT-AS1	yes
rs17691508	17	43968463	C	G	0.7741	2.76e-08	0.0543	0.0098	G	C	0.1873	1.01e-13	-0.085161	0.011448	B2	MAPT-AS1	yes
rs62056760	17	43968572	A	G	0.226	2.57e-08	-0.0544	0.0098	A	G	0.1841	7.82e-14	-0.08569	0.011466	B2	MAPT-AS1	yes
rs55895732	17	43968937	T	C	0.7741	2.82e-08	0.0543	0.0098	C	T	0.1838	9.8e-14	-0.085221	0.011449	B2	MAPT-AS1	yes
rs55960528	17	43968994	T	C	0.7741	2.23e-08	0.0546	0.0098	C	T	0.1837	1.43e-13	-0.084655	0.01145	B2	MAPT-AS1	yes
rs55877243	17	43969019	T	C	0.7741	2.29e-08	0.0546	0.0098	C	T	0.1837	1.32e-13	-0.084773	0.01145	B2	MAPT-AS1	yes
rs17770296	17	43969136	T	C	0.2259	2.63e-08	-0.0544	0.0098	T	C	0.1829	8.15e-12	-0.084035	0.012293	B2	MAPT-AS1	yes
rs17691556	17	43969168	A	T	0.2259	2.72e-08	-0.0543	0.0098	A	T	0.1837	1.2e-13	-0.08491	0.011449	B2	MAPT-AS1	yes
rs17770337	17	43969779	T	G	0.2259	2.5e-08	-0.0545	0.0098	T	G	0.1837	1.3e-08	-0.07312	0.012859	B2	MAPT-AS1	yes
rs62056773	17	43969833	A	G	0.7741	2.18e-08	0.0547	0.0098	G	A	0.1837	9.34e-14	-0.085295	0.011449	B2	MAPT-AS1	yes
rs62056774	17	43969901	A	G	0.2259	2.24e-08	-0.0547	0.0098	A	G	0.1837	1.24e-13	-0.084891	0.011452	B2	MAPT-AS1	yes
rs62056775	17	43969952	T	C	0.7741	2.07e-08	0.0548	0.0098	C	T	0.1837	1.2e-13	-0.084924	0.01145	B2	MAPT-AS1	yes
rs62056776	17	43969995	T	C	0.2259	2.23e-08	-0.0547	0.0098	T	C	0.1837	1.36e-08	-0.073019	0.012859	B2	MAPT-AS1	yes
rs78729125	17	43970108	A	C	0.226	2.1e-08	-0.0548	0.0098	A	C	0.2171	1.39e-12	-0.081875	0.011557	B2	MAPT-AS1	yes
rs17770343	17	43970154	T	C	0.7741	2.43e-08	0.0545	0.0098	C	T	0.1837	9.35e-14	-0.085283	0.011448	B2	MAPT-AS1	yes
rs62056777	17	43970303	A	G	0.2258	2.36e-08	-0.0546	0.0098	A	G	0.1837	1.06e-13	-0.085112	0.011451	B2	MAPT-AS1	yes
rs17691610	17	43970662	T	G	0.2259	2.68e-08	-0.0543	0.0098	T	G	0.1837	1.09e-13	-0.085055	0.011448	B2	MAPT-AS1	yes
rs76594404	17	43971457	C	G	0.2259	2.77e-08	-0.0543	0.0098	C	G	0.1837	1.33e-13	-0.084779	0.011451	B2	MAPT-AS1	yes
rs80233201	17	43971481	T	C	0.7741	2.7e-08	0.0543	0.0098	C	T	0.1837	1.31e-13	-0.084778	0.011449	B2	MAPT-AS1	yes
rs62056778	17	43971604	C	G	0.7741	2.76e-08	0.0543	0.0098	G	C	0.1874	1.17e-13	-0.084945	0.011447	B2	MAPT-AS1	yes
rs11575895	17	43971785	A	G	0.7741	2.66e-08	0.0544	0.0098	G	A	0.1838	9.79e-14	-0.085233	0.01145	B2	MAPT-AS1	yes
rs62056779	17	43971937	A	C	0.2259	2.73e-08	-0.0543	0.0098	A	C	0.1837	1.33e-08	-0.073073	0.012859	B2	MAPT-AS1	yes
rs11575896	17	43972142	A	G	0.2259	2.71e-08	-0.0543	0.0098	A	G	0.1837	9.93e-14	-0.085215	0.011451	B2	MAPT-AS1	yes
rs74457229	17	43972581	T	C	0.2259	2.88e-08	-0.0542	0.0098	T	C	0.1837	1.3e-08	-0.073138	0.012862	B2	MAPT-AS1	yes
rs74548327	17	43973080	A	G	0.7741	2.74e-08	0.0543	0.0098	G	A	0.1837	1.5e-08	-0.072905	0.012877	B2	MAPT	yes
rs111972148	17	43973121	C	G	0.2259	2.71e-08	-0.0543	0.0098	C	G	0.184	8.53e-09	-0.074302	0.012905	B2	MAPT	yes
rs76324150	17	43973233	T	C	0.2259	2.72e-08	-0.0543	0.0098	T	C	0.1837	1.52e-13	-0.084569	0.011451	B2	MAPT-IT1	yes
rs113347741	17	43973408	T	C	0.2259	2.75e-08	-0.0543	0.0098	T	C	0.1835	1.55e-08	-0.072753	0.012863	B2	MAPT-IT1	yes
rs78720789	17	43973413	A	G	0.7741	2.95e-08	0.0542	0.0098	G	A	0.1835	2.01e-13	-0.084209	0.01146	B2	MAPT-IT1	yes
rs62056780	17	43973652	T	C	0.2259	2.79e-08	-0.0543	0.0098	T	C	0.1836	1.86e-13	-0.084303	0.011457	B2	MAPT-IT1	yes
rs62056781	17	43973899	T	C	0.7741	2.82e-08	0.0543	0.0098	C	T	0.1837	1.46e-13	-0.084636	0.011451	B2	MAPT-IT1	yes
rs74496580	17	43974065	A	C	0.2259	2.86e-08	-0.0542	0.0098	A	C	0.1837	1.31e-08	-0.073104	0.012859	B2	MAPT-IT1	yes
rs62056782	17	43974230	T	C	0.2259	2.79e-08	-0.0543	0.0098	T	C	0.1837	1.25e-13	-0.084846	0.011449	B2	MAPT-IT1	yes
rs80346216	17	43974476	T	G	0.2259	2.81e-08	-0.0543	0.0098	T	G	0.1837	1.48e-13	-0.084603	0.011451	B2	MAPT-IT1	yes
rs76632685	17	43974477	A	T	0.7741	2.67e-08	0.0543	0.0098	T	A	0.1873	9.83e-14	-0.085217	0.011449	B2	MAPT-IT1	yes
rs62056783	17	43974549	C	G	0.2259	2.79e-08	-0.0543	0.0098	C	G	0.1837	9.97e-14	-0.085186	0.011448	B2	MAPT-IT1	yes
rs62056784	17	43974889	C	G	0.7741	2.79e-08	0.0543	0.0098	G	C	0.1873	1.16e-13	-0.084969	0.011449	B2	MAPT-IT1	yes
rs62056785	17	43975263	T	C	0.7741	2.77e-08	0.0543	0.0098	C	T	0.1842	1.07e-13	-0.085049	0.011443	B2	MAPT-IT1	yes
rs62056786	17	43975285	T	C	0.7742	2.5e-08	0.0545	0.0098	C	T	0.1834	7.34e-12	-0.084166	0.012285	B2	MAPT-IT1	yes
rs62056789	17	43975415	A	C	0.774	2.77e-08	0.0543	0.0098	C	A	0.1836	1.24e-13	-0.085018	0.011469	B2	MAPT-IT1	yes
rs62056790	17	43975417	A	G	0.2259	2.8e-08	-0.0543	0.0098	A	G	0.1836	1.37e-13	-0.084846	0.011466	B2	MAPT-IT1	yes
rs62056791	17	43976064	T	C	0.7741	2.91e-08	0.0542	0.0098	C	T	0.1837	9.14e-14	-0.085313	0.011447	B2	MAPT-IT1	yes
rs77561671	17	43976627	T	G	0.2259	2.49e-08	-0.0545	0.0098	T	G	0.184	9.72e-14	-0.085371	0.011467	B2	MAPT	yes
rs62056792	17	43976644	A	G	0.2259	2.73e-08	-0.0543	0.0098	A	G	0.1837	1.1e-13	-0.085046	0.011448	B2	MAPT	yes
rs62056793	17	43977018	A	G	0.7741	2.8e-08	0.0543	0.0098	G	A	0.1837	9e-14	-0.085339	0.011448	B2	MAPT	yes
rs62056794	17	43977049	A	G	0.7741	2.8e-08	0.0543	0.0098	G	A	0.1837	9.48e-14	-0.085259	0.011447	B2	MAPT	yes
rs1864324	17	43977702	T	C	0.2259	2.65e-08	-0.0544	0.0098	T	C	0.1837	1.42e-13	-0.084666	0.01145	B2	MAPT	yes
rs1864325	17	43977827	T	C	0.226	2.6e-08	-0.0544	0.0098	T	C	0.1837	1.42e-13	-0.084636	0.011446	B2	MAPT	yes
rs62056795	17	43978041	T	C	0.2259	2.63e-08	-0.0544	0.0098	T	C	0.1837	9.96e-14	-0.085188	0.011448	B2	MAPT	yes
rs62056796	17	43978120	A	G	0.7741	2.64e-08	0.0544	0.0098	G	A	0.1837	9.64e-14	-0.085237	0.011448	B2	MAPT	yes
rs55691306	17	43978295	C	G	0.2259	2.65e-08	-0.0544	0.0098	C	G	0.1837	1.37e-08	-0.073001	0.012859	B2	MAPT	yes
rs55823844	17	43978320	A	G	0.226	2.73e-08	-0.0543	0.0098	A	G	0.1837	1.68e-08	-0.072583	0.012865	B2	MAPT	yes
rs1467962	17	43978604	A	G	0.7741	2.67e-08	0.0543	0.0098	G	A	0.1837	1.07e-13	-0.085086	0.011448	B2	MAPT	yes
rs1467963	17	43978934	T	G	0.7741	2.64e-08	0.0544	0.0098	G	T	0.1837	9.62e-14	-0.085229	0.011446	B2	MAPT	yes
rs62056800	17	43979468	A	T	0.2259	2.71e-08	-0.0543	0.0098	A	T	0.1837	1.27e-13	-0.084846	0.011451	B2	MAPT	yes
rs62056801	17	43979504	A	G	0.2259	2.63e-08	-0.0544	0.0098	A	G	0.1837	1.17e-13	-0.084943	0.011448	B2	MAPT	yes
rs113834264	17	43979622	A	G	0.2259	2.68e-08	-0.0543	0.0098	A	G	0.184	7.04e-14	-0.085855	0.011467	B2	MAPT	yes
rs2099151	17	43979822	A	T	0.774	2.85e-08	0.0542	0.0098	T	A	0.1873	1.09e-13	-0.085059	0.011448	B2	MAPT	yes
rs2082068	17	43979971	T	C	0.2259	2.62e-08	-0.0544	0.0098	T	C	0.1837	1.27e-13	-0.084849	0.011451	B2	MAPT	yes
rs1984937	17	43980530	A	C	0.7741	2.65e-08	0.0544	0.0098	C	A	0.1837	1.08e-13	-0.085087	0.01145	B2	MAPT	yes
rs62056802	17	43980762	A	G	0.7741	2.55e-08	0.0544	0.0098	G	A	0.1837	1.51e-08	-0.072791	0.01286	B2	MAPT	yes
rs62056803	17	43982159	A	G	0.774	2.68e-08	0.0543	0.0098	G	A	0.1837	1.23e-13	-0.08488	0.01145	B2	MAPT	yes
rs62056804	17	43982286	T	C	0.2259	2.67e-08	-0.0544	0.0098	T	C	0.1837	1.05e-13	-0.08511	0.011449	B2	MAPT	yes
rs77084869	17	43982903	A	G	0.7741	2.71e-08	0.0543	0.0098	G	A	0.2052	1.24e-13	-0.085216	0.011496	B2	MAPT	yes
rs74573628	17	43982961	T	C	0.7741	2.76e-08	0.0543	0.0098	C	T	0.1837	9.3e-14	-0.085289	0.011447	B2	MAPT	yes
rs75617973	17	43983159	T	C	0.7741	2.59e-08	0.0544	0.0098	C	T	0.1837	8.35e-14	-0.085447	0.011447	B2	MAPT	yes
rs62056805	17	43983363	A	G	0.2259	2.76e-08	-0.0543	0.0098	A	G	0.1836	1.42e-13	-0.084663	0.01145	B2	MAPT	yes
rs62056806	17	43983801	A	G	0.7741	2.53e-08	0.0544	0.0098	G	A	0.1837	1.09e-13	-0.085046	0.011447	B2	MAPT	yes
rs62056807	17	43984253	C	G	0.2259	2.7e-08	-0.0543	0.0098	C	G	0.1837	9.39e-14	-0.085274	0.011447	B2	MAPT	yes
rs1467966	17	43984399	T	C	0.2259	2.57e-08	-0.0544	0.0098	T	C	0.1837	1.05e-13	-0.085101	0.011447	B2	MAPT	yes
rs62056808	17	43984646	T	C	0.7745	3.18e-08	0.0541	0.0098	C	T	0.1834	1.74e-13	-0.084465	0.011464	B2	MAPT	yes
rs62056809	17	43984669	A	G	0.7746	3.75e-08	0.0539	0.0098	G	A	0.1834	2e-08	-0.072414	0.012903	B2	MAPT	yes
rs62056810	17	43984672	T	C	0.7745	3.26e-08	0.0541	0.0098	C	T	0.1834	2.44e-13	-0.083954	0.011466	B2	MAPT	yes
rs79492906	17	43984864	T	C	0.2259	2.49e-08	-0.0545	0.0098	T	C	0.1837	1.03e-13	-0.085146	0.011449	B2	MAPT	yes
rs62056811	17	43985247	T	C	0.2259	2.65e-08	-0.0544	0.0098	T	C	0.184	6.21e-14	-0.086049	0.011468	B2	MAPT	yes
rs74509629	17	43985597	T	C	0.2259	2.62e-08	-0.0544	0.0098	T	C	0.1837	1.05e-13	-0.085112	0.011448	B2	MAPT	yes
rs79290980	17	43985662	T	C	0.7741	2.53e-08	0.0545	0.0098	C	T	0.1837	9.46e-14	-0.085262	0.011447	B2	MAPT	yes
rs4371195	17	43986420	A	G	0.7741	2.61e-08	0.0544	0.0098	G	A	0.1837	9.79e-14	-0.085232	0.01145	B2	MAPT	yes
rs12150125	17	43986432	A	G	0.226	2.38e-08	-0.0546	0.0098	A	G	0.1837	1.49e-13	-0.084606	0.011452	B2	MAPT	yes
rs12150527	17	43986462	A	G	0.7742	2.82e-08	0.0543	0.0098	G	A	0.1836	9.63e-14	-0.085262	0.011451	B2	MAPT	yes
rs7502888	17	43986992	C	G	0.2259	2.44e-08	-0.0545	0.0098	C	G	0.1837	1.09e-13	-0.085058	0.011449	B2	MAPT	yes
rs62056812	17	43987154	A	G	0.2252	3.23e-08	-0.0541	0.0098	A	G	0.2049	9.5e-09	-0.07428	0.012942	B2	MAPT	yes
rs28439143	17	43987723	A	G	0.2254	2.13e-08	-0.0548	0.0098	A	G	0.1835	5.49e-14	-0.086197	0.011463	B2	MAPT	yes
rs56189701	17	43987801	T	C	0.7748	2.33e-08	0.0547	0.0098	C	T	0.1833	1.95e-13	-0.084353	0.011473	B2	MAPT	yes
rs62056835	17	43988623	A	G	0.2259	2.43e-08	-0.0545	0.0098	A	G	0.1837	9.64e-14	-0.085245	0.011449	B2	MAPT	yes
rs62056837	17	43988884	T	C	0.7741	2.17e-08	0.0547	0.0098	C	T	0.1836	7.77e-14	-0.085594	0.011452	B2	MAPT	yes
rs62056838	17	43989087	A	G	0.7741	2.36e-08	0.0546	0.0098	G	A	0.1836	8.68e-14	-0.085418	0.011451	B2	MAPT	yes
rs62056839	17	43989221	T	C	0.7741	2.36e-08	0.0546	0.0098	C	T	0.1836	8.3e-14	-0.085487	0.011451	B2	MAPT	yes
rs62056840	17	43989689	T	C	0.774	2.51e-08	0.0545	0.0098	C	T	0.1836	1.09e-13	-0.085083	0.011451	B2	MAPT	yes
rs112116311	17	43989898	T	G	0.7741	2.54e-08	0.0544	0.0098	G	T	0.184	8.48e-14	-0.085611	0.011472	B2	MAPT	yes
rs78209533	17	43989909	A	G	0.7741	2.57e-08	0.0544	0.0098	G	A	0.184	9.84e-09	-0.073908	0.01289	B2	MAPT	yes
rs62056841	17	43990041	A	C	0.7741	2.35e-08	0.0546	0.0098	C	A	0.1836	8.16e-14	-0.085534	0.011454	B2	MAPT	yes
rs79860128	17	43990072	A	G	0.7741	2.48e-08	0.0545	0.0098	G	A	0.1836	9.48e-14	-0.085301	0.011453	B2	MAPT	yes
rs9944484	17	43990662	A	G	0.2261	2.61e-08	-0.0544	0.0098	A	G	0.1838	1.33e-13	-0.084778	0.011451	B2	MAPT	yes
rs17563965	17	43990919	A	G	0.774	2.42e-08	0.0545	0.0098	G	A	0.1837	7.7e-14	-0.085611	0.011452	B2	MAPT	yes
rs17563986	17	43991272	A	G	0.7741	2.5e-08	0.0545	0.0098	G	A	0.1836	1.23e-13	-0.08491	0.011454	B2	MAPT	yes
rs17564020	17	43991781	T	G	0.2261	3e-08	-0.0541	0.0098	T	G	0.183	5.45e-12	-0.084732	0.012292	B2	MAPT	yes
rs55682376	17	43991888	A	G	0.2259	2.56e-08	-0.0544	0.0098	A	G	0.1836	1.16e-13	-0.084989	0.011453	B2	MAPT	yes
rs55788678	17	43992233	T	C	0.2255	2.32e-08	-0.0547	0.0098	T	C	0.1833	1.33e-13	-0.084914	0.011471	B2	MAPT	yes
rs56042957	17	43992244	A	G	0.2257	2.65e-08	-0.0544	0.0098	A	G	0.1834	1.21e-08	-0.073382	0.012879	B2	MAPT	yes
rs55810795	17	43992283	A	G	0.7743	2.53e-08	0.0545	0.0098	G	A	0.1835	8.62e-14	-0.085516	0.011462	B2	MAPT	yes
rs55933304	17	43992305	A	G	0.2257	2.56e-08	-0.0545	0.0098	A	G	0.1835	1.46e-13	-0.084735	0.011465	B2	MAPT	yes
rs62056848	17	43992456	A	G	0.2259	2.47e-08	-0.0545	0.0098	A	G	0.1836	1.01e-13	-0.08519	0.011452	B2	MAPT	yes
rs62056849	17	43992463	C	G	0.2259	2.47e-08	-0.0545	0.0098	C	G	0.1836	1.3e-08	-0.073157	0.012865	B2	MAPT	yes
rs62056850	17	43992581	T	C	0.2265	4.22e-08	-0.0535	0.0098	T	C	0.1842	5.8e-14	-0.086	0.011448	B2	MAPT	yes
rs62056851	17	43992806	A	G	0.7741	2.5e-08	0.0545	0.0098	G	A	0.2169	1.32e-12	-0.082085	0.011574	B2	MAPT	yes
rs77926909	17	43994252	T	C	0.7737	2.32e-08	0.0546	0.0098	C	T	0.1838	3.15e-14	-0.087091	0.011472	B2	MAPT	yes
rs111541901	17	43994358	T	C	0.2257	2.28e-08	-0.0547	0.0098	T	C	0.1834	4.5e-14	-0.086642	0.011482	B2	MAPT	yes
rs17649518	17	43994386	A	C	0.2259	2.33e-08	-0.0546	0.0098	A	C	0.1835	4.59e-14	-0.086549	0.011474	B2	MAPT	yes
rs62056859	17	43994435	A	G	0.774	2.1e-08	0.0548	0.0098	G	A	0.1837	4.4e-14	-0.086603	0.011473	B2	MAPT	yes
rs112647192	17	43994623	A	G	0.2259	2.42e-08	-0.0546	0.0098	A	G	0.1836	4.94e-14	-0.086442	0.011474	B2	MAPT	yes
rs17649553	17	43994648	T	C	0.2262	4.43e-08	-0.0535	0.0098	T	C	0.1835	2.66e-12	-0.086169	0.01232	B2	MAPT	yes
rs17649571	17	43994952	A	G	0.7741	2.58e-08	0.0544	0.0098	G	A	0.1836	5.93e-14	-0.086157	0.011473	B2	MAPT	yes
rs17564153	17	43995098	A	G	0.2259	2.18e-08	-0.0547	0.0098	A	G	0.1836	1.06e-13	-0.085313	0.011477	B2	MAPT	yes
rs17649635	17	43995990	A	G	0.7741	2.67e-08	0.0544	0.0098	G	A	0.1836	5.81e-14	-0.086187	0.011473	B2	MAPT	yes
rs55760800	17	43996908	T	G	0.774	2.75e-08	0.0543	0.0098	G	T	0.1837	7.54e-09	-0.074516	0.012895	B2	MAPT	yes
rs56303672	17	43996960	A	G	0.774	2.77e-08	0.0543	0.0098	G	A	0.1836	7.42e-14	-0.085835	0.011475	B2	MAPT	yes
rs17649641	17	43997372	T	C	0.774	2.08e-08	0.0548	0.0098	C	T	0.1828	4.24e-12	-0.085395	0.012325	B2	MAPT	yes
rs75046472	17	43997499	A	T	0.7741	2.7e-08	0.0544	0.0098	T	A	0.1873	5.51e-14	-0.086277	0.011474	B2	MAPT	yes
rs17564223	17	43997520	T	C	0.2258	2.77e-08	-0.0543	0.0098	T	C	0.184	5.18e-14	-0.086366	0.011474	B2	MAPT	yes
rs17649700	17	43997901	C	G	0.226	2.44e-08	-0.0545	0.0098	C	G	0.1837	6.12e-14	-0.086133	0.011476	B2	MAPT	yes
rs62058962	17	43998151	T	C	0.2259	2.23e-08	-0.0547	0.0098	T	C	0.1839	4.28e-14	-0.086905	0.011507	B2	MAPT	yes
rs1467969	17	43998328	T	C	0.2259	2.3e-08	-0.0546	0.0098	T	C	0.1836	1.04e-13	-0.085416	0.011486	B2	MAPT	yes
rs1467970	17	43998574	T	G	0.7741	2.3e-08	0.0546	0.0098	G	T	0.1836	5.13e-14	-0.086379	0.011473	B2	MAPT	yes
rs767058	17	43998767	T	C	0.7739	2.24e-08	0.0547	0.0098	C	T	0.1838	1.85e-13	-0.084531	0.011486	B2	MAPT	yes
rs767057	17	43998822	A	G	0.7741	2.3e-08	0.0546	0.0098	G	A	0.1836	1.29e-08	-0.073457	0.012915	B2	MAPT	yes
rs767056	17	43998910	T	C	0.2258	2.38e-08	-0.0546	0.0098	T	C	0.1829	7.26e-12	-0.084879	0.012386	B2	MAPT	yes
rs767059	17	43999100	C	G	0.2259	2.62e-08	-0.0544	0.0098	C	G	0.1821	5.57e-14	-0.086657	0.011527	B2	MAPT	yes
rs62058964	17	43999406	A	G	0.7741	2.6e-08	0.0544	0.0098	G	A	0.1839	4.19e-14	-0.086844	0.011495	B2	MAPT	yes
rs62058965	17	43999529	C	G	0.2259	2.64e-08	-0.0544	0.0098	C	G	0.1836	5.79e-14	-0.086195	0.011473	B2	MAPT	yes
rs1967981	17	43999785	C	G	0.774	2.81e-08	0.0543	0.0098	G	C	0.1872	7.8e-09	-0.074448	0.012896	B2	MAPT	yes
rs1476127	17	43999793	A	G	0.226	2.69e-08	-0.0544	0.0098	A	G	0.1836	7.48e-09	-0.074538	0.012896	B2	MAPT	yes
rs55929431	17	44000202	A	G	0.226	2.52e-08	-0.0545	0.0098	A	G	0.1837	4.95e-14	-0.08643	0.011473	B2	MAPT	yes
rs8079501	17	44000234	A	T	0.774	2.61e-08	0.0544	0.0098	T	A	0.1872	5.21e-14	-0.086357	0.011474	B2	MAPT	yes
rs56002706	17	44000505	T	C	0.2259	2.62e-08	-0.0544	0.0098	T	C	0.1836	6.23e-14	-0.086091	0.011474	B2	MAPT	yes
rs8078495	17	44000610	A	G	0.2259	2.73e-08	-0.0543	0.0098	A	G	0.1836	6.16e-14	-0.086106	0.011474	B2	MAPT	yes
rs17649866	17	44000914	T	C	0.7741	2.71e-08	0.0544	0.0098	C	T	0.1836	5.3e-14	-0.086327	0.011473	B2	MAPT	yes
rs62058968	17	44001228	A	G	0.2259	2.76e-08	-0.0543	0.0098	A	G	0.1836	6.79e-14	-0.08597	0.011475	B2	MAPT	yes
rs17564493	17	44001379	T	C	0.226	2.76e-08	-0.0543	0.0098	T	C	0.1828	3.46e-12	-0.085747	0.012324	B2	MAPT	yes
rs17649918	17	44001621	A	G	0.7742	2.8e-08	0.0543	0.0098	G	A	0.1828	5.54e-12	-0.084945	0.012327	B2	MAPT	yes
rs17649954	17	44001661	A	G	0.7741	2.66e-08	0.0544	0.0098	G	A	0.1836	5.7e-14	-0.086229	0.011475	B2	MAPT	yes
rs55685451	17	44001957	T	G	0.7741	2.66e-08	0.0544	0.0098	G	T	0.1836	7.96e-14	-0.085737	0.011476	B2	MAPT	yes
rs17564591	17	44002062	A	C	0.7741	2.68e-08	0.0544	0.0098	C	A	0.1835	7.21e-14	-0.085878	0.011475	B2	MAPT	yes
rs17564619	17	44002138	A	G	0.7741	2.61e-08	0.0544	0.0098	G	A	0.1836	6.81e-14	-0.085965	0.011475	B2	MAPT	yes
rs62059003	17	44002431	T	C	0.2259	2.7e-08	-0.0544	0.0098	T	C	0.1836	7.89e-14	-0.085746	0.011475	B2	MAPT	yes
rs17650063	17	44002555	A	G	0.7741	2.68e-08	0.0544	0.0098	G	A	0.1836	5.58e-14	-0.086259	0.011474	B2	MAPT	yes
rs17564703	17	44002595	T	C	0.2259	2.56e-08	-0.0545	0.0098	T	C	0.1828	4.02e-12	-0.085488	0.012324	B2	MAPT	yes
rs76090253	17	44002969	A	C	0.774	2.69e-08	0.0544	0.0098	C	A	0.1836	4.84e-14	-0.08646	0.011473	B2	MAPT	yes
rs55788597	17	44003397	A	T	0.2259	2.6e-08	-0.0544	0.0098	A	T	0.1836	6.19e-14	-0.086138	0.011479	B2	MAPT	yes
rs56197117	17	44003446	A	G	0.7741	2.82e-08	0.0543	0.0098	G	A	0.1836	8.19e-09	-0.074337	0.012896	B2	MAPT	yes
rs56249311	17	44003599	T	C	0.2259	2.96e-08	-0.0542	0.0098	T	C	0.1836	6.72e-14	-0.085987	0.011475	B2	MAPT	yes
rs62059004	17	44003893	A	G	0.774	2.92e-08	0.0542	0.0098	G	A	0.1836	7.06e-14	-0.085937	0.011478	B2	MAPT	yes
rs76500077	17	44004076	T	C	0.7741	2.61e-08	0.0544	0.0098	C	T	0.1836	5.96e-14	-0.086158	0.011474	B2	MAPT	yes
rs62059005	17	44004472	A	G	0.7741	2.67e-08	0.0544	0.0098	G	A	0.1828	4.16e-12	-0.085436	0.012326	B2	MAPT	yes
rs113796169	17	44005254	A	T	0.2259	2.83e-08	-0.0543	0.0098	A	T	0.1836	6.85e-09	-0.074735	0.012898	B2	MAPT	yes
rs17564780	17	44005413	A	G	0.7741	3.04e-08	0.0542	0.0098	G	A	0.1836	6.9e-09	-0.074841	0.012919	B2	MAPT	yes
rs62059007	17	44005615	A	G	0.7741	2.64e-08	0.0544	0.0098	G	A	0.1836	4.23e-14	-0.086682	0.011475	B2	MAPT	yes
rs62061705	17	44006252	T	C	0.774	2.59e-08	0.0544	0.0098	C	T	0.1836	6.07e-14	-0.086147	0.011476	B2	MAPT	yes
rs17564829	17	44006601	T	C	0.7741	2.69e-08	0.0544	0.0098	C	T	0.1837	5.33e-14	-0.086326	0.011474	B2	MAPT	yes
rs62061706	17	44006896	T	C	0.7741	2.61e-08	0.0544	0.0098	C	T	0.1836	7.15e-09	-0.074645	0.012898	B2	MAPT	yes
rs62061707	17	44006954	T	C	0.7746	1.87e-08	0.0551	0.0098	C	T	0.1831	8.72e-14	-0.085728	0.011493	B2	MAPT	yes
rs62061708	17	44006956	A	G	0.7746	1.92e-08	0.055	0.0098	G	A	0.1831	9.6e-14	-0.085573	0.011492	B2	MAPT	yes
rs62061709	17	44007493	T	C	0.2259	2.67e-08	-0.0544	0.0098	T	C	0.1836	5.17e-14	-0.086373	0.011474	B2	MAPT	yes
rs62061712	17	44009876	A	C	0.2258	3.02e-08	-0.0542	0.0098	A	C	0.2051	1.07e-08	-0.074284	0.012989	B2	MAPT	yes
rs7501759	17	44009921	A	G	0.7742	3.14e-08	0.0541	0.0098	G	A	0.205	1.16e-08	-0.074144	0.012996	B2	MAPT	yes
rs2316782	17	44010040	A	G	0.7741	2.83e-08	0.0543	0.0098	G	A	0.1828	4.54e-12	-0.085284	0.012325	B2	MAPT	yes
rs2316783	17	44010118	C	G	0.2259	2.82e-08	-0.0543	0.0098	C	G	0.1836	6.03e-14	-0.086144	0.011475	B2	MAPT	yes
rs4255816	17	44010364	C	G	0.7741	2.81e-08	0.0543	0.0098	G	C	0.1872	6.78e-14	-0.085994	0.011478	B2	MAPT	yes
rs62061713	17	44010405	A	G	0.7741	2.78e-08	0.0543	0.0098	G	A	0.1836	5.6e-14	-0.086274	0.011477	B2	MAPT	yes
rs62061714	17	44010452	A	C	0.2262	3.37e-08	-0.054	0.0098	A	C	0.1909	9.45e-13	-0.082353	0.011537	B2	MAPT	yes
rs78077519	17	44010984	A	G	0.2259	2.88e-08	-0.0543	0.0098	A	G	0.1836	6.46e-14	-0.086057	0.011477	B2	MAPT	yes
rs17564871	17	44011018	A	G	0.7741	2.39e-08	0.0546	0.0098	G	A	0.1828	4.77e-12	-0.08524	0.012332	B2	MAPT	yes
rs17650258	17	44011073	A	G	0.2259	2.81e-08	-0.0543	0.0098	A	G	0.1836	4.54e-14	-0.086574	0.011475	B2	MAPT	yes
rs62061715	17	44011526	A	G	0.7741	2.78e-08	0.0543	0.0098	G	A	0.1836	5.73e-14	-0.086233	0.011476	B2	MAPT	yes
rs17564948	17	44011749	A	G	0.7741	2.8e-08	0.0543	0.0098	G	A	0.1836	5.39e-14	-0.086312	0.011474	B2	MAPT	yes
rs17564983	17	44011825	A	C	0.7741	2.76e-08	0.0543	0.0098	C	A	0.1836	8.12e-09	-0.074371	0.012898	B2	MAPT	yes
rs62061716	17	44012096	A	G	0.7741	2.81e-08	0.0543	0.0098	G	A	0.1836	5.55e-14	-0.086279	0.011476	B2	MAPT	yes
rs17650335	17	44012343	A	G	0.2259	2.7e-08	-0.0544	0.0098	A	G	0.1836	6.93e-14	-0.085952	0.011477	B2	MAPT	yes
rs17565025	17	44012463	T	C	0.7734	2.94e-08	0.0542	0.0098	C	T	0.1838	7.05e-14	-0.085881	0.011471	B2	MAPT	yes
rs77924424	17	44012915	T	C	0.7741	2.76e-08	0.0544	0.0098	C	T	0.1836	8.29e-14	-0.085682	0.011477	B2	MAPT	yes
rs62061719	17	44012989	T	C	0.2259	2.77e-08	-0.0543	0.0098	T	C	0.1836	8.79e-09	-0.074195	0.012898	B2	MAPT	yes
rs17650417	17	44013103	T	G	0.2259	2.46e-08	-0.0545	0.0098	T	G	0.1836	7.47e-14	-0.085841	0.011477	B2	MAPT	yes
rs62061720	17	44013189	T	C	0.2259	2.54e-08	-0.0545	0.0098	T	C	0.1836	6.06e-14	-0.086147	0.011476	B2	MAPT	yes
rs62061721	17	44013346	T	C	0.7741	2.78e-08	0.0543	0.0098	C	T	0.1836	6.15e-14	-0.086135	0.011477	B2	MAPT	yes
rs79857651	17	44013475	A	G	0.2254	3.05e-08	-0.0543	0.0098	A	G	0.1833	5.74e-14	-0.086362	0.011494	B2	MAPT	yes
rs113756354	17	44013483	A	G	0.7746	3.07e-08	0.0543	0.0098	G	A	0.1831	6.04e-14	-0.086299	0.011495	B2	MAPT	yes
rs12150111	17	44013938	A	G	0.7741	2.89e-08	0.0543	0.0098	G	A	0.1828	6.9e-12	-0.084378	0.012301	B2	MAPT	yes
rs12150460	17	44014137	T	G	0.2259	2.93e-08	-0.0542	0.0098	T	G	0.1836	1.18e-08	-0.073392	0.012869	B2	MAPT	yes
rs12150195	17	44014263	T	C	0.7741	2.78e-08	0.0543	0.0098	C	T	0.1828	6.97e-12	-0.084368	0.012301	B2	MAPT	yes
rs55874169	17	44014384	A	G	0.2259	3.03e-08	-0.0542	0.0098	A	G	0.1836	9.81e-14	-0.085265	0.011455	B2	MAPT	yes
rs12150229	17	44015446	A	G	0.7745	3.43e-08	0.054	0.0098	G	A	0.1834	1.15e-13	-0.085101	0.011465	B2	MAPT	yes
rs12150230	17	44015464	A	G	0.7745	3.21e-08	0.0542	0.0098	G	A	0.1826	6.75e-12	-0.08449	0.012311	B2	MAPT	yes
rs12150576	17	44015624	A	G	0.2259	2.99e-08	-0.0542	0.0098	A	G	0.184	7.38e-14	-0.085836	0.011474	B2	MAPT	yes
rs12150235	17	44015745	A	G	0.7742	2.98e-08	0.0542	0.0098	G	A	0.1836	8.51e-14	-0.085483	0.011455	B2	MAPT	yes
rs12150242	17	44015816	A	G	0.7741	3.01e-08	0.0542	0.0098	G	A	0.1836	1.16e-08	-0.073436	0.01287	B2	MAPT	yes
rs12150104	17	44015929	A	G	0.2259	3e-08	-0.0542	0.0098	A	G	0.1836	8.07e-14	-0.085553	0.011454	B2	MAPT	yes
rs62061725	17	44016157	C	G	0.2258	2.87e-08	-0.0543	0.0098	C	G	0.1836	1.06e-13	-0.085189	0.01146	B2	MAPT	yes
rs62061726	17	44016341	A	G	0.2259	2.99e-08	-0.0542	0.0098	A	G	0.1837	1.01e-13	-0.085243	0.011457	B2	MAPT	yes
rs113537106	17	44016462	A	G	0.7741	2.99e-08	0.0542	0.0098	G	A	0.1836	9.12e-14	-0.085383	0.011456	B2	MAPT	yes
rs62061727	17	44017124	T	G	0.2259	3.23e-08	-0.0541	0.0098	T	G	0.1836	1.22e-13	-0.084976	0.01146	B2	MAPT	yes
rs62061728	17	44017180	T	G	0.7741	3.02e-08	0.0542	0.0098	G	T	0.1836	9.46e-14	-0.085331	0.011457	B2	MAPT	yes
rs62061729	17	44017283	A	G	0.7741	3.01e-08	0.0542	0.0098	G	A	0.1836	1.14e-08	-0.073464	0.01287	B2	MAPT	yes
rs62061730	17	44017342	A	G	0.7742	3.17e-08	0.0541	0.0098	G	A	0.1836	1.03e-13	-0.085214	0.011458	B2	MAPT	yes
rs62061731	17	44017666	A	C	0.2258	2.8e-08	-0.0543	0.0098	A	C	0.1836	1.15e-08	-0.073453	0.01287	B2	MAPT	yes
rs62061732	17	44017941	T	G	0.2259	3.05e-08	-0.0542	0.0098	T	G	0.1836	1.51e-13	-0.084638	0.011459	B2	MAPT	yes
rs62062768	17	44019479	C	G	0.7743	3.43e-08	0.054	0.0098	G	C	0.1873	1.04e-13	-0.085248	0.011464	B2	MAPT	yes
rs62062769	17	44019643	A	G	0.2258	2.91e-08	-0.0543	0.0098	A	G	0.184	5.48e-14	-0.086158	0.011457	B2	MAPT	yes
rs62062770	17	44019680	T	C	0.7743	3.02e-08	0.0542	0.0098	C	T	0.184	6.77e-14	-0.085839	0.011457	B2	MAPT	yes
rs62062771	17	44020282	A	G	0.2257	3.45e-08	-0.054	0.0098	A	G	0.1836	5.18e-14	-0.086264	0.01146	B2	MAPT	yes
rs62062772	17	44020314	T	C	0.2257	2.87e-08	-0.0543	0.0098	T	C	0.1836	8.43e-09	-0.074159	0.012876	B2	MAPT	yes
rs62062773	17	44020545	A	G	0.7742	2.82e-08	0.0543	0.0098	G	A	0.1837	7.03e-14	-0.085776	0.011456	B2	MAPT	yes
rs79115768	17	44021061	T	C	0.2258	3.06e-08	-0.0542	0.0098	T	C	0.1836	1.08e-13	-0.085244	0.011472	B2	MAPT	yes
rs28416808	17	44021218	T	C	0.226	2.55e-08	-0.0545	0.0098	T	C	0.183	5.11e-12	-0.084923	0.012303	B2	MAPT	yes
rs62062774	17	44021463	T	C	0.7743	3.08e-08	0.0542	0.0098	C	T	0.1836	7.09e-14	-0.085766	0.011457	B2	MAPT	yes
rs2316784	17	44021699	T	G	0.2252	3.22e-08	-0.0542	0.0098	T	G	0.1824	7.43e-12	-0.08446	0.012331	B2	MAPT	yes
rs4327091	17	44021717	A	G	0.2252	3.11e-08	-0.0543	0.0098	A	G	0.1834	1.04e-08	-0.073834	0.012899	B2	MAPT	yes
rs4479290	17	44021744	T	C	0.7747	2.87e-08	0.0544	0.0098	C	T	0.1835	1.1e-08	-0.073652	0.01289	B2	MAPT	yes
rs62062776	17	44022043	A	C	0.7743	2.8e-08	0.0544	0.0098	C	A	0.1838	7.33e-14	-0.085746	0.011461	B2	MAPT	yes
rs75839508	17	44022319	A	G	0.2257	2.92e-08	-0.0543	0.0098	A	G	0.1836	1.03e-13	-0.085243	0.011461	B2	MAPT	yes
rs75686108	17	44022376	T	C	0.2257	2.99e-08	-0.0542	0.0098	T	C	0.1836	9.93e-09	-0.073793	0.012874	B2	MAPT	yes
rs79765413	17	44022433	T	C	0.7747	3.84e-08	0.0539	0.0098	C	T	0.1834	8.62e-14	-0.085618	0.011476	B2	MAPT	yes
rs78834738	17	44022434	A	G	0.2253	3.62e-08	-0.054	0.0098	A	G	0.1834	1.1e-13	-0.085257	0.011478	B2	MAPT	yes
rs62062778	17	44022528	A	G	0.7743	3.18e-08	0.0541	0.0098	G	A	0.1836	8.87e-14	-0.085464	0.011461	B2	MAPT	yes
rs62062779	17	44022577	A	C	0.7745	2.61e-08	0.0545	0.0098	C	A	0.1834	7.97e-14	-0.085676	0.011468	B2	MAPT	yes
rs62062780	17	44022593	T	C	0.2255	2.76e-08	-0.0544	0.0098	T	C	0.1834	9.2e-14	-0.085458	0.011468	B2	MAPT	yes
rs62062781	17	44022632	A	G	0.2257	3.01e-08	-0.0542	0.0098	A	G	0.1836	8.27e-14	-0.085556	0.01146	B2	MAPT	yes
rs62062782	17	44023087	A	G	0.2257	3.22e-08	-0.0541	0.0098	A	G	0.1836	8.96e-14	-0.085423	0.011458	B2	MAPT	yes
rs62062783	17	44023520	T	G	0.7743	3.04e-08	0.0542	0.0098	G	T	0.1836	1.08e-13	-0.085166	0.011461	B2	MAPT	yes
rs62062784	17	44024552	C	G	0.7742	2.6e-08	0.0545	0.0098	G	C	0.1872	3.06e-13	-0.083645	0.011471	B2	MAPT	yes
rs62062785	17	44024562	T	G	0.2257	2.8e-08	-0.0544	0.0098	T	G	0.1836	1.32e-13	-0.084876	0.011464	B2	MAPT	yes
rs62062786	17	44024660	C	G	0.2257	2.9e-08	-0.0543	0.0098	C	G	0.1841	7.71e-09	-0.074335	0.012873	B2	MAPT	yes
rs62062787	17	44024865	T	C	0.7743	2.74e-08	0.0544	0.0098	C	T	0.1836	1.17e-08	-0.07342	0.012873	B2	MAPT	yes
rs62062788	17	44024906	A	G	0.7743	2.88e-08	0.0543	0.0098	G	A	0.1836	1.05e-13	-0.08523	0.011464	B2	MAPT	yes
rs62062789	17	44025033	T	C	0.7748	2.15e-08	0.0549	0.0098	C	T	0.1833	1.23e-13	-0.08509	0.011478	B2	MAPT	yes
rs62062790	17	44025045	T	C	0.2253	2.1e-08	-0.0549	0.0098	T	C	0.1833	1.65e-13	-0.084652	0.011479	B2	MAPT	yes
rs62062791	17	44025273	A	G	0.2257	2.9e-08	-0.0543	0.0098	A	G	0.1836	7.15e-14	-0.08576	0.011458	B2	MAPT	yes
rs62062792	17	44025347	T	C	0.7743	2.9e-08	0.0543	0.0098	C	T	0.1836	8.59e-14	-0.085496	0.011459	B2	MAPT	yes
rs78026984	17	44025592	C	G	0.2257	2.91e-08	-0.0543	0.0098	C	G	0.1836	1.16e-08	-0.073437	0.012873	B2	MAPT	yes
rs113395365	17	44025650	T	C	0.7743	2.91e-08	0.0543	0.0098	C	T	0.1836	7.53e-14	-0.085677	0.011457	B2	MAPT	yes
rs62062793	17	44026321	T	C	0.7743	2.86e-08	0.0543	0.0098	C	T	0.1836	7.32e-14	-0.085728	0.011458	B2	MAPT	yes
rs62062794	17	44026394	A	G	0.7743	2.87e-08	0.0543	0.0098	G	A	0.1836	8.64e-14	-0.085474	0.011457	B2	MAPT	yes
rs242561	17	44026548	T	C	0.2311	4.44e-08	-0.0538	0.0098	C	T	0.8123	1.66e-12	0.087425	0.012382	B2	MAPT	yes
rs62062795	17	44027090	T	C	0.2257	3.02e-08	-0.0542	0.0098	T	C	0.1837	9.18e-14	-0.085396	0.011459	B2	MAPT	yes
rs62062796	17	44027316	A	G	0.2257	3.61e-08	-0.0539	0.0098	A	G	0.1836	1.05e-13	-0.085206	0.011461	B2	MAPT	yes
rs62062797	17	44027366	T	G	0.7749	2.57e-08	0.0546	0.0098	G	T	0.1832	7.91e-14	-0.085755	0.011477	B2	MAPT	yes
rs62062798	17	44027383	A	G	0.7749	2.95e-08	0.0544	0.0098	G	A	0.1832	9.02e-14	-0.085561	0.011478	B2	MAPT	yes
rs62062799	17	44027521	T	G	0.2257	2.83e-08	-0.0544	0.0098	T	G	0.1839	1.05e-08	-0.073664	0.012874	B2	MAPT	yes
rs62062800	17	44027753	A	G	0.7743	2.92e-08	0.0543	0.0098	G	A	0.1837	9.24e-14	-0.085385	0.011459	B2	MAPT	yes
rs62062801	17	44028011	T	G	0.7743	2.82e-08	0.0543	0.0098	G	T	0.2169	9.91e-13	-0.082482	0.011565	B2	MAPT	yes
rs62062802	17	44028045	T	G	0.2258	2.73e-08	-0.0544	0.0098	T	G	0.2256	7.69e-13	-0.08302	0.011585	B2	MAPT	yes
rs62062803	17	44028183	T	C	0.7742	2.68e-08	0.0544	0.0098	C	T	0.1844	1.08e-13	-0.085119	0.011455	B2	MAPT	yes
rs74903707	17	44028707	A	G	0.2258	2.76e-08	-0.0544	0.0098	A	G	0.1836	8.41e-14	-0.085516	0.011458	B2	MAPT	yes
rs77017444	17	44028796	T	C	0.7743	2.35e-08	0.0547	0.0098	C	T	0.1836	8.07e-14	-0.085629	0.011464	B2	MAPT	yes
rs76839282	17	44029178	C	G	0.2256	2.77e-08	-0.0544	0.0098	C	G	0.1835	9.12e-14	-0.085403	0.011459	B2	MAPT	yes
rs17650579	17	44030115	T	C	0.2257	2.94e-08	-0.0543	0.0098	T	C	0.1836	7.04e-14	-0.085794	0.011459	B2	MAPT	yes
rs17650597	17	44030195	A	T	0.7743	2.74e-08	0.0544	0.0098	T	A	0.1872	7.03e-14	-0.085786	0.011458	B2	MAPT	yes
rs17650633	17	44030231	T	C	0.7743	2.8e-08	0.0544	0.0098	C	T	0.1835	6.32e-14	-0.085942	0.011457	B2	MAPT	yes
rs17650651	17	44030311	T	G	0.7743	2.73e-08	0.0544	0.0098	G	T	0.1835	6.2e-14	-0.08597	0.011457	B2	MAPT	yes
rs62062805	17	44030773	A	G	0.7743	2.53e-08	0.0545	0.0098	G	A	0.1835	6.59e-14	-0.085888	0.011458	B2	MAPT	yes
rs62062806	17	44031420	A	G	0.2258	2.77e-08	-0.0544	0.0098	A	G	0.1839	4.61e-14	-0.086544	0.011474	B2	MAPT	yes
rs55978005	17	44031540	T	G	0.2257	2.77e-08	-0.0544	0.0098	T	G	0.1836	6.53e-14	-0.085887	0.011456	B2	MAPT	yes
rs55946323	17	44031946	A	G	0.7743	2.6e-08	0.0545	0.0098	G	A	0.1835	5.46e-14	-0.086167	0.011458	B2	MAPT	yes
rs56317731	17	44032073	A	G	0.7743	2.76e-08	0.0544	0.0098	G	A	0.1835	6.46e-14	-0.085912	0.011457	B2	MAPT	yes
rs55821155	17	44032470	C	G	0.7742	2.76e-08	0.0544	0.0098	G	C	0.1872	8.91e-09	-0.074014	0.012871	B2	MAPT	yes
rs56080482	17	44032597	A	G	0.2257	2.93e-08	-0.0543	0.0098	A	G	0.1835	1.14e-13	-0.085099	0.011463	B2	MAPT	yes
rs17571718	17	44032768	T	C	0.7742	2.91e-08	0.0543	0.0098	C	T	0.1835	7.71e-14	-0.085645	0.011457	B2	MAPT	yes
rs78555354	17	44032879	A	G	0.7744	2.99e-08	0.0543	0.0098	G	A	0.1835	7.37e-14	-0.08575	0.011462	B2	MAPT	yes
rs17571739	17	44032915	T	C	0.7745	3.53e-08	0.054	0.0098	C	T	0.1834	9.16e-14	-0.085456	0.011467	B2	MAPT	yes
rs62062813	17	44032956	A	G	0.2255	3.57e-08	-0.054	0.0098	A	G	0.1834	9.59e-14	-0.085381	0.011466	B2	MAPT	yes
rs62063262	17	44033002	T	C	0.7743	3.12e-08	0.0542	0.0098	C	T	0.1835	6.89e-14	-0.085822	0.011458	B2	MAPT	yes
rs113520245	17	44033132	T	C	0.2239	3.97e-08	-0.0541	0.0099	T	C	0.1823	6.99e-09	-0.074938	0.01294	B2	MAPT	yes
rs113277432	17	44033169	T	C	0.776	3.88e-08	0.0541	0.0098	C	T	0.1824	1.03e-13	-0.085604	0.011511	B2	MAPT	yes
rs112950348	17	44033188	A	G	0.224	3.69e-08	-0.0542	0.0098	A	G	0.1824	8.54e-09	-0.074497	0.012939	B2	MAPT	yes
rs62063263	17	44033394	C	G	0.2252	2.44e-08	-0.0547	0.0098	C	G	0.1831	1.05e-13	-0.08532	0.011476	B2	MAPT	yes
rs62063264	17	44033401	T	C	0.2252	2.43e-08	-0.0547	0.0098	T	C	0.1831	1.26e-13	-0.085045	0.011476	B2	MAPT	yes
rs62063265	17	44033468	A	G	0.2257	3.64e-08	-0.0539	0.0098	A	G	0.1835	8.89e-14	-0.085469	0.011463	B2	MAPT	yes
rs62063266	17	44033488	T	C	0.2257	3.26e-08	-0.0541	0.0098	T	C	0.1834	7.05e-14	-0.085833	0.011464	B2	MAPT	yes
rs17571781	17	44033802	T	C	0.7742	2.94e-08	0.0543	0.0098	C	T	0.1829	3.3e-12	-0.085847	0.012327	B2	MAPT	yes
rs62063269	17	44034833	A	G	0.2257	2.86e-08	-0.0544	0.0098	A	G	0.1835	5.09e-14	-0.086287	0.01146	B2	MAPT	yes
rs17571809	17	44034859	A	G	0.7742	2.96e-08	0.0543	0.0098	G	A	0.1835	5.07e-14	-0.086293	0.01146	B2	MAPT	yes
rs17650771	17	44035367	A	G	0.7741	2.69e-08	0.0544	0.0098	G	A	0.1835	5.11e-14	-0.08628	0.01146	B2	MAPT	yes
rs77555455	17	44035516	A	G	0.2259	2.76e-08	-0.0544	0.0098	A	G	0.1835	4.94e-14	-0.086335	0.01146	B2	MAPT	yes
rs17571857	17	44035706	A	G	0.7741	2.74e-08	0.0544	0.0098	G	A	0.1827	4.39e-12	-0.085227	0.012309	B2	MAPT	yes
rs62063271	17	44036047	A	G	0.2259	2.95e-08	-0.0543	0.0098	A	G	0.1836	1e-13	-0.085298	0.011464	B2	MAPT	yes
rs112916880	17	44036129	T	C	0.2258	2.64e-08	-0.0545	0.0098	T	C	0.1835	7.3e-14	-0.085759	0.011461	B2	MAPT	yes
rs62063275	17	44036287	A	G	0.7742	2.49e-08	0.0546	0.0098	G	A	0.1836	7.5e-14	-0.085726	0.011463	B2	MAPT	yes
rs62063276	17	44036408	T	G	0.7733	3.71e-08	0.0539	0.0098	G	T	0.1825	9.42e-14	-0.085353	0.011459	B2	MAPT	yes
rs62063277	17	44036462	A	T	0.2258	2.81e-08	-0.0544	0.0098	A	T	0.1836	6.11e-14	-0.086012	0.01146	B2	MAPT	yes
rs17650818	17	44036787	T	C	0.7741	2.86e-08	0.0543	0.0098	C	T	0.1829	4.8e-12	-0.085046	0.012305	B2	MAPT	yes
rs62063278	17	44036914	T	C	0.2254	3.25e-08	-0.0542	0.0098	T	C	0.1835	5.6e-14	-0.086358	0.011488	B2	MAPT	yes
rs62063279	17	44036936	A	G	0.2254	3.32e-08	-0.0542	0.0098	A	G	0.1832	9.7e-09	-0.073939	0.012891	B2	MAPT	yes
rs113793114	17	44037079	A	G	0.2259	4.39e-08	-0.0536	0.0098	A	G	0.1837	6.06e-14	-0.085992	0.011455	B2	MAPT	yes
rs62063280	17	44037299	C	G	0.2255	2.85e-08	-0.0544	0.0098	C	G	0.1834	5.47e-14	-0.086237	0.011467	B2	MAPT	yes
rs17650842	17	44037491	A	G	0.7742	2.55e-08	0.0545	0.0098	G	A	0.1828	3.97e-12	-0.085403	0.012309	B2	MAPT	yes
rs17650860	17	44039008	A	G	0.2243	3.4e-08	-0.0542	0.0098	A	G	0.1827	9.86e-09	-0.074099	0.012925	B2	MAPT	yes
rs62063282	17	44039043	A	G	0.2253	2.37e-08	-0.0547	0.0098	A	G	0.1834	4.91e-14	-0.086398	0.011467	B2	MAPT	yes
rs111520035	17	44039410	A	G	0.7744	2.78e-08	0.0544	0.0098	G	A	0.1835	3.47e-14	-0.086857	0.011459	B2	MAPT	yes
rs17650872	17	44039516	T	G	0.2256	2.79e-08	-0.0544	0.0098	T	G	0.1827	2.45e-12	-0.086242	0.01231	B2	MAPT	yes
rs55780945	17	44040120	T	C	0.2256	2.89e-08	-0.0543	0.0098	T	C	0.1835	6.3e-14	-0.085991	0.011463	B2	MAPT	yes
rs55711941	17	44040823	T	C	0.2256	2.82e-08	-0.0544	0.0098	T	C	0.1835	5.19e-14	-0.086273	0.011462	B2	MAPT	yes
rs55709241	17	44041101	T	C	0.7753	1.64e-08	0.0554	0.0098	C	T	0.1829	4.62e-14	-0.086584	0.01148	B2	MAPT	yes
rs56280951	17	44041107	A	G	0.2247	1.8e-08	-0.0553	0.0098	A	G	0.1828	6.36e-14	-0.086116	0.011482	B2	MAPT	yes
rs112206871	17	44041817	A	G	0.7746	3.39e-08	0.0541	0.0098	G	A	0.2049	8.22e-09	-0.074727	0.012965	B2	MAPT	yes
rs56166491	17	44042221	A	G	0.7741	2.36e-08	0.0547	0.0098	G	A	0.1835	7.25e-09	-0.074479	0.012874	B2	MAPT	yes
rs56226437	17	44042361	T	C	0.7749	2.58e-08	0.0546	0.0098	C	T	0.1832	9.36e-09	-0.074026	0.012892	B2	MAPT	yes
rs55907036	17	44042366	A	G	0.2251	2.53e-08	-0.0546	0.0098	A	G	0.1832	8.85e-09	-0.074147	0.012892	B2	MAPT	yes
rs111751251	17	44042951	T	C	0.2236	4.17e-08	-0.0548	0.01	T	C	0.1801	2.61e-08	-0.077415	0.013909	B2	MAPT	yes
rs62063291	17	44043378	T	C	0.7743	2.24e-08	0.0547	0.0098	C	T	0.1835	2.48e-14	-0.087372	0.011461	B2	MAPT	yes
rs62063292	17	44043636	T	C	0.2256	2.86e-08	-0.0543	0.0098	T	C	0.1835	3.49e-14	-0.086836	0.011458	B2	MAPT	yes
rs62063293	17	44043819	A	G	0.2256	2.93e-08	-0.0543	0.0098	A	G	0.1835	4.19e-14	-0.086581	0.01146	B2	MAPT	yes
rs62063294	17	44044157	A	G	0.2255	2.7e-08	-0.0544	0.0098	A	G	0.1835	6.34e-09	-0.074884	0.012894	B2	MAPT	yes
rs17650973	17	44044220	A	T	0.7743	2.6e-08	0.0545	0.0098	T	A	0.1871	3.78e-14	-0.086717	0.011458	B2	MAPT	yes
rs62063295	17	44044431	T	C	0.2255	2.67e-08	-0.0545	0.0098	T	C	0.1835	4.07e-14	-0.086616	0.011459	B2	MAPT	yes
rs17650991	17	44044508	A	C	0.7744	2.87e-08	0.0543	0.0098	C	A	0.1835	3.56e-14	-0.08681	0.011458	B2	MAPT	yes
rs75145092	17	44044823	A	T	0.2256	2.97e-08	-0.0543	0.0098	A	T	0.1835	4.15e-14	-0.086575	0.011458	B2	MAPT	yes
rs113857334	17	44044940	T	C	0.7744	2.83e-08	0.0544	0.0098	C	T	0.1835	3.64e-14	-0.086786	0.011459	B2	MAPT	yes
rs17572147	17	44044985	A	G	0.7745	2.85e-08	0.0543	0.0098	G	A	0.1826	1.69e-12	-0.086888	0.012311	B2	MAPT	yes
rs77513497	17	44045474	A	G	0.7744	2.88e-08	0.0543	0.0098	G	A	0.1835	3.21e-14	-0.086973	0.011459	B2	MAPT	yes
rs17572169	17	44045974	T	C	0.2257	2.79e-08	-0.0543	0.0098	T	C	0.1835	5.86e-09	-0.074934	0.012874	B2	MAPT	yes
rs62063296	17	44046202	T	C	0.2256	2.93e-08	-0.0543	0.0098	T	C	0.1835	3.2e-14	-0.086968	0.011458	B2	MAPT	yes
rs62641967	17	44047216	T	G	0.7746	2.93e-08	0.0543	0.0098	G	T	0.1922	2.27e-13	-0.084578	0.011536	B2	MAPT	yes
rs74373419	17	44047609	T	C	0.2256	2.85e-08	-0.0543	0.0098	T	C	0.1835	3.41e-14	-0.08686	0.011456	B2	MAPT	yes
rs62063297	17	44047802	A	T	0.7744	2.86e-08	0.0543	0.0098	T	A	0.1871	3.27e-14	-0.086928	0.011457	B2	MAPT	yes
rs62063298	17	44048323	T	G	0.2248	4.22e-08	-0.0538	0.0098	T	G	0.183	2.49e-14	-0.087523	0.011483	B2	MAPT	yes
rs62063299	17	44048336	T	C	0.7752	3.97e-08	0.0539	0.0098	C	T	0.183	2.97e-09	-0.076555	0.012902	B2	MAPT	yes
rs62063300	17	44048350	T	C	0.7752	3.96e-08	0.0539	0.0098	C	T	0.183	2.06e-14	-0.08779	0.01148	B2	MAPT	yes
rs62063303	17	44049133	T	C	0.7745	2.94e-08	0.0543	0.0098	C	T	0.1835	3.93e-14	-0.086667	0.011459	B2	MAPT	yes
rs75242405	17	44049329	T	C	0.2256	2.87e-08	-0.0543	0.0098	T	C	0.1835	4.17e-14	-0.086572	0.011458	B2	MAPT	yes
rs17651093	17	44049550	A	G	0.2257	3.31e-08	-0.0541	0.0098	A	G	0.1835	7.31e-09	-0.074441	0.012871	B2	MAPT	yes
rs17572248	17	44049867	A	G	0.7743	2.94e-08	0.0543	0.0098	G	A	0.1835	3.31e-14	-0.086906	0.011457	B2	MAPT	yes
rs62063304	17	44049900	A	G	0.7746	2.98e-08	0.0543	0.0098	G	A	0.1838	2.75e-14	-0.087191	0.011458	B2	MAPT	yes
rs62063305	17	44050282	A	G	0.2256	2.83e-08	-0.0544	0.0098	A	G	0.1835	3.81e-14	-0.086701	0.011457	B2	MAPT	yes
rs17651134	17	44050340	A	G	0.2257	2.83e-08	-0.0543	0.0098	A	G	0.1835	4.15e-14	-0.086583	0.011458	B2	MAPT	yes
rs62063306	17	44050395	A	C	0.2256	2.88e-08	-0.0543	0.0098	A	C	0.1835	3.81e-14	-0.086702	0.011457	B2	MAPT	yes
rs62063774	17	44050463	T	C	0.7744	2.92e-08	0.0543	0.0098	C	T	0.1835	3.52e-14	-0.086823	0.011458	B2	MAPT	yes
rs62063775	17	44050823	T	G	0.2256	3.06e-08	-0.0542	0.0098	T	G	0.1835	3.67e-14	-0.086764	0.011458	B2	MAPT	yes
rs62063776	17	44050850	A	G	0.7744	3.18e-08	0.0542	0.0098	G	A	0.1835	2.88e-14	-0.087121	0.011458	B2	MAPT	yes
rs117124984	17	44051588	C	G	0.7766	3.45e-08	0.0544	0.0099	G	C	0.1852	3.73e-14	-0.087238	0.011524	B2	MAPT	yes
rs118087478	17	44051589	T	G	0.7765	3.25e-08	0.0545	0.0099	G	T	0.1815	4.13e-14	-0.087105	0.011527	B2	MAPT	yes
rs77875796	17	44051612	A	G	0.7757	2.74e-08	0.0547	0.0098	G	A	0.1821	3.56e-14	-0.087194	0.011509	B2	MAPT	yes
rs1800547	17	44051846	A	G	0.7743	2.73e-08	0.0544	0.0098	G	A	0.1835	3.2e-14	-0.086956	0.011457	B2	MAPT	yes
rs17651213	17	44051924	A	G	0.2257	2.86e-08	-0.0543	0.0098	A	G	0.1835	3.96e-14	-0.086654	0.011459	B2	MAPT	yes
rs17651243	17	44052284	A	G	0.2257	2.87e-08	-0.0543	0.0098	A	G	0.1835	3.63e-14	-0.086775	0.011458	B2	MAPT	yes
rs78104015	17	44052733	A	G	0.7744	2.88e-08	0.0543	0.0098	G	A	0.1835	3.22e-14	-0.086951	0.011457	B2	MAPT	yes
rs62063777	17	44053171	A	G	0.7744	2.93e-08	0.0543	0.0098	G	A	0.1835	2.93e-14	-0.087081	0.011456	B2	MAPT	yes
rs2217394	17	44053448	A	G	0.7743	2.84e-08	0.0543	0.0098	G	A	0.1827	2.39e-12	-0.086249	0.012304	B2	MAPT	yes
rs62063778	17	44053989	A	G	0.2256	2.83e-08	-0.0544	0.0098	A	G	0.1835	4.5e-14	-0.086469	0.011459	B2	MAPT	yes
rs17651285	17	44054237	A	G	0.2257	2.85e-08	-0.0543	0.0098	A	G	0.1835	3.92e-14	-0.086657	0.011457	B2	MAPT	yes
rs17572467	17	44054388	T	C	0.7743	2.82e-08	0.0543	0.0098	C	T	0.1835	3.16e-14	-0.086971	0.011456	B2	MAPT	yes
rs17572495	17	44054596	T	G	0.7743	2.85e-08	0.0543	0.0098	G	T	0.1835	5.81e-09	-0.074935	0.012871	B2	MAPT	yes
rs62063779	17	44054671	T	C	0.2256	2.89e-08	-0.0543	0.0098	T	C	0.1834	3.45e-14	-0.086857	0.011459	B2	MAPT	yes
rs754513	17	44055638	A	T	0.2255	2.78e-08	-0.0544	0.0098	A	T	0.1834	5.37e-14	-0.086288	0.01147	B2	MAPT	yes
rs754512	17	44055647	A	T	0.7743	2.99e-08	0.0542	0.0098	T	A	0.1871	5.39e-14	-0.086274	0.01147	B2	MAPT	yes
rs62063780	17	44056238	A	G	0.7744	3.08e-08	0.0542	0.0098	G	A	0.1835	3.36e-14	-0.086884	0.011457	B2	MAPT	yes
rs2163129	17	44056433	T	C	0.7745	3.39e-08	0.0541	0.0098	C	T	0.1836	4.1e-14	-0.086594	0.011457	B2	MAPT	yes
rs1981997	17	44056767	A	G	0.2258	2.87e-08	-0.0543	0.0098	A	G	0.1835	3.73e-14	-0.086702	0.011453	B2	MAPT	yes
rs1981998	17	44056833	A	G	0.2257	3.02e-08	-0.0542	0.0098	A	G	0.1835	3.55e-14	-0.086806	0.011457	B2	MAPT	yes
rs3785884	17	44057595	A	G	0.2306	1.32e-08	-0.0552	0.0097	A	G	0.1941	1.7e-14	-0.087614	0.011421	B2	MAPT	yes
rs77527347	17	44058017	T	G	0.2255	2.56e-08	-0.0545	0.0098	T	G	0.1835	4.88e-09	-0.075315	0.012872	B2	MAPT	yes
rs17572627	17	44058629	A	T	0.2256	3.04e-08	-0.0542	0.0098	A	T	0.1835	3.88e-14	-0.086671	0.011457	B2	MAPT	yes
rs66635171	17	44058699	T	TAGG	0.224	4.68e-08	-0.0545	0.01	T	TAGG	0.1801	1.38e-13	-0.090339	0.012211	B2	MAPT	yes
rs17651483	17	44058861	A	C	0.2257	2.77e-08	-0.0544	0.0098	A	C	0.1835	4.62e-14	-0.086423	0.011459	B2	MAPT	yes
rs62063783	17	44059215	T	C	0.2256	3.09e-08	-0.0542	0.0098	T	C	0.1836	5.69e-14	-0.086129	0.011461	B2	MAPT	yes
rs62063784	17	44059775	A	G	0.7744	2.71e-08	0.0544	0.0098	G	A	0.1835	5.66e-09	-0.07499	0.01287	B2	MAPT	yes
rs56234850	17	44060248	A	G	0.2257	3.25e-08	-0.0541	0.0098	A	G	0.1835	4.28e-14	-0.086533	0.011458	B2	MAPT	yes
rs63750417	17	44060775	T	C	0.2258	2.48e-08	-0.0545	0.0098	T	C	0.1835	1.37e-15	-0.091763	0.011487	B2	MAPT	yes
rs62063786	17	44061023	A	G	0.2259	3.94e-08	-0.0538	0.0098	A	G	0.1836	4.58e-14	-0.086462	0.011462	B2	MAPT	yes
rs62063787	17	44061036	T	C	0.7743	2.69e-08	0.0544	0.0098	C	T	0.1827	2.49e-12	-0.086181	0.012304	B2	MAPT	yes
rs17651549	17	44061278	T	C	0.2257	2.71e-08	-0.0544	0.0098	T	C	0.1836	5.86e-09	-0.074881	0.012865	B2	MAPT	yes
rs62063788	17	44061696	T	C	0.2256	2.64e-08	-0.0545	0.0098	T	C	0.1836	3.21e-14	-0.086948	0.011456	B2	MAPT	yes
rs62063789	17	44061898	T	C	0.7743	3.05e-08	0.0542	0.0098	C	T	0.1835	2.38e-14	-0.087388	0.011456	B2	MAPT	yes
rs56363731	17	44062337	A	G	0.2256	2.71e-08	-0.0544	0.0098	A	G	0.1835	3.05e-14	-0.087018	0.011456	B2	MAPT	yes
rs56240566	17	44062689	A	C	0.7746	3.82e-08	0.054	0.0098	C	A	0.2057	1.9e-08	-0.072817	0.012954	B2	MAPT	yes
rs62063790	17	44062915	T	G	0.2255	2.98e-08	-0.0543	0.0098	T	G	0.1835	4.37e-14	-0.086514	0.01146	B2	MAPT	yes
rs62063791	17	44062993	A	G	0.7745	2.62e-08	0.0545	0.0098	G	A	0.1835	2.75e-14	-0.087183	0.011457	B2	MAPT	yes
rs1529534	17	44063140	A	G	0.7745	3.75e-08	0.0539	0.0098	G	A	0.1834	4.91e-14	-0.086339	0.011459	B2	MAPT	yes
rs17572795	17	44063393	A	G	0.2257	2.83e-08	-0.0543	0.0098	A	G	0.1835	3.33e-14	-0.08689	0.011456	B2	MAPT	yes
rs17572823	17	44063563	T	C	0.7743	2.91e-08	0.0543	0.0098	C	T	0.1827	2.61e-12	-0.086093	0.012304	B2	MAPT	yes
rs9901937	17	44063723	A	C	0.7743	3.14e-08	0.0542	0.0098	C	A	0.182	4.18e-14	-0.086994	0.011514	B2	MAPT	yes
rs17572851	17	44063766	A	G	0.7743	2.78e-08	0.0544	0.0098	G	A	0.1827	2.44e-12	-0.086219	0.012305	B2	MAPT	yes
rs62063792	17	44063787	A	G	0.7744	2.7e-08	0.0544	0.0098	G	A	0.1835	3.44e-14	-0.086842	0.011456	B2	MAPT	yes
rs17572893	17	44064208	A	G	0.2256	3.13e-08	-0.0542	0.0098	A	G	0.1835	4.23e-14	-0.086575	0.011461	B2	MAPT	yes
rs62063793	17	44064334	T	C	0.7744	3.31e-08	0.0541	0.0098	C	T	0.1834	4.1e-14	-0.086586	0.011457	B2	MAPT	yes
rs1529535	17	44064759	A	C	0.7743	2.88e-08	0.0543	0.0098	C	A	0.2253	4.29e-08	-0.071706	0.013089	B2	MAPT	yes
rs10445371	17	44065410	A	G	0.2257	2.82e-08	-0.0543	0.0098	A	G	0.1835	3.92e-14	-0.086655	0.011457	B2	MAPT	yes
rs919461	17	44065669	A	T	0.7744	2.87e-08	0.0543	0.0098	T	A	0.1871	5.95e-09	-0.074882	0.01287	B2	MAPT	yes
rs919462	17	44065740	T	C	0.2256	2.99e-08	-0.0543	0.0098	T	C	0.1835	3.78e-14	-0.086718	0.011458	B2	MAPT	yes
rs919464	17	44065901	T	C	0.2256	2.86e-08	-0.0543	0.0098	T	C	0.1835	3.68e-14	-0.086762	0.011458	B2	MAPT	yes
rs62063794	17	44066088	A	T	0.2256	2.85e-08	-0.0543	0.0098	A	T	0.1839	2.44e-14	-0.087492	0.011474	B2	MAPT	yes
rs112385572	17	44066172	A	G	0.7744	2.84e-08	0.0544	0.0098	G	A	0.1835	3.78e-14	-0.086721	0.011458	B2	MAPT	yes
rs113134013	17	44066995	T	C	0.2256	2.88e-08	-0.0543	0.0098	T	C	0.1838	2.53e-14	-0.087451	0.011476	B2	MAPT	yes
rs76357066	17	44067046	A	G	0.2256	2.65e-08	-0.0545	0.0098	A	G	0.1835	4.1e-14	-0.086597	0.011458	B2	MAPT	yes
rs10445337	17	44067400	T	C	0.7741	2.78e-08	0.0544	0.0098	C	T	0.1837	3.08e-14	-0.08707	0.011464	B2	MAPT	yes
rs79447161	17	44067508	A	G	0.7745	2.71e-08	0.0544	0.0098	G	A	0.1838	2.55e-14	-0.08742	0.011474	B2	MAPT	yes
rs17651754	17	44067546	T	C	0.7744	2.69e-08	0.0544	0.0098	C	T	0.1835	3.21e-14	-0.086944	0.011456	B2	MAPT	yes
rs10445338	17	44067682	A	G	0.2256	2.66e-08	-0.0545	0.0098	A	G	0.1837	6.1e-09	-0.074833	0.012871	B2	MAPT	yes
rs111652694	17	44067831	T	C	0.7744	2.91e-08	0.0543	0.0098	C	T	0.1835	3.44e-14	-0.086846	0.011456	B2	MAPT	yes
rs75743061	17	44068112	C	G	0.7744	3e-08	0.0543	0.0098	G	C	0.1945	2.69e-13	-0.084179	0.011517	B2	MAPT	yes
rs62063795	17	44068238	T	C	0.2256	2.87e-08	-0.0543	0.0098	T	C	0.1837	4e-14	-0.086645	0.011459	B2	MAPT	yes
rs62063796	17	44068289	A	G	0.2256	2.92e-08	-0.0543	0.0098	A	G	0.1834	5.8e-09	-0.074961	0.012875	B2	MAPT	yes
rs62063797	17	44068294	C	G	0.2256	2.93e-08	-0.0543	0.0098	C	G	0.1834	5.15e-14	-0.086294	0.011463	B2	MAPT	yes
rs77290642	17	44068480	T	C	0.7744	2.95e-08	0.0543	0.0098	C	T	0.1836	6.26e-09	-0.074761	0.012869	B2	MAPT	yes
rs76618565	17	44068481	A	G	0.2255	2.92e-08	-0.0543	0.0098	A	G	0.1834	3.88e-14	-0.086704	0.011461	B2	MAPT	yes
rs62063798	17	44068543	A	G	0.2256	2.84e-08	-0.0544	0.0098	A	G	0.1834	3.8e-14	-0.086725	0.01146	B2	MAPT	yes
rs1052551	17	44068924	A	G	0.2257	2.66e-08	-0.0544	0.0098	A	G	0.1834	6.25e-09	-0.074809	0.012876	B2	MAPT	yes
rs62063799	17	44069180	C	G	0.7744	2.83e-08	0.0544	0.0098	G	C	0.2216	4.58e-08	-0.071211	0.013026	B2	MAPT	yes
rs62063800	17	44069198	T	C	0.2256	3e-08	-0.0543	0.0098	T	C	0.1834	5.84e-09	-0.074951	0.012875	B2	MAPT	yes
rs17651857	17	44069687	A	G	0.7744	3.08e-08	0.0542	0.0098	G	A	0.1826	2.81e-12	-0.086007	0.012309	B2	MAPT	yes
rs74759276	17	44069768	A	G	0.7744	3.14e-08	0.0542	0.0098	G	A	0.1834	4.25e-14	-0.086563	0.01146	B2	MAPT	yes
rs17651887	17	44069840	A	G	0.2256	2.99e-08	-0.0543	0.0098	A	G	0.1834	4.15e-14	-0.086601	0.011461	B2	MAPT	yes
rs78599197	17	44069970	C	G	0.7744	3.11e-08	0.0542	0.0098	G	C	0.187	4.28e-14	-0.086541	0.011459	B2	MAPT	yes
rs62063842	17	44070111	C	G	0.2256	3.14e-08	-0.0542	0.0098	C	G	0.1834	4.68e-14	-0.08642	0.011461	B2	MAPT	yes
rs55662347	17	44070545	A	G	0.2256	3.1e-08	-0.0542	0.0098	A	G	0.1834	3.97e-14	-0.086664	0.011461	B2	MAPT	yes
rs55913645	17	44070956	A	T	0.2256	3.21e-08	-0.0541	0.0098	A	T	0.1834	4.13e-14	-0.086607	0.011461	B2	MAPT	yes
rs17573175	17	44071089	C	G	0.7744	3.15e-08	0.0542	0.0098	G	C	0.187	3.78e-14	-0.086727	0.011459	B2	MAPT	yes
rs62063845	17	44071294	T	C	0.7743	3.03e-08	0.0542	0.0098	C	T	0.1834	4.44e-14	-0.086541	0.011466	B2	MAPT	yes
rs62063846	17	44071674	A	G	0.7745	3.02e-08	0.0543	0.0098	G	A	0.1834	3.8e-14	-0.08673	0.011461	B2	MAPT	yes
rs55736025	17	44072017	A	C	0.2256	3.16e-08	-0.0542	0.0098	A	C	0.1834	6.07e-09	-0.074864	0.012875	B2	MAPT	yes
rs55886080	17	44072041	A	T	0.2256	3.09e-08	-0.0542	0.0098	A	T	0.1834	4.62e-14	-0.086444	0.011461	B2	MAPT	yes
rs75944932	17	44072423	A	C	0.7745	2.69e-08	0.0545	0.0098	C	A	0.2252	3.45e-13	-0.084301	0.011587	B2	MAPT	yes
rs17573245	17	44072854	T	C	0.7743	2.7e-08	0.0545	0.0098	C	T	0.1835	3.58e-14	-0.086805	0.011459	B2	MAPT	yes
rs17573266	17	44072881	C	G	0.7742	3.54e-08	0.054	0.0098	G	C	0.1872	3.72e-14	-0.08677	0.011462	B2	MAPT	yes
rs112572874	17	44072984	A	G	0.773	4.85e-08	0.0534	0.0098	G	A	0.1849	2.19e-14	-0.087576	0.011465	B2	MAPT	yes
rs17652036	17	44073027	A	G	0.2255	2.71e-08	-0.0545	0.0098	A	G	0.1834	2.82e-14	-0.087195	0.011463	B2	MAPT	yes
rs62063849	17	44073062	T	G	0.7743	2.89e-08	0.0543	0.0098	G	T	0.1836	2.91e-14	-0.087126	0.01146	B2	MAPT	yes
rs17652066	17	44073145	C	G	0.2254	2.96e-08	-0.0543	0.0098	C	G	0.1833	4.08e-14	-0.086648	0.011464	B2	MAPT	yes
rs62063850	17	44073739	A	G	0.2256	3.03e-08	-0.0542	0.0098	A	G	0.1834	5.9e-14	-0.086095	0.011464	B2	MAPT	yes
rs1052553	17	44073889	A	G	0.7739	2.4e-08	0.0546	0.0098	G	A	0.1837	6.72e-09	-0.074781	0.012899	B2	MAPT	yes
rs17652121	17	44073973	T	C	0.7743	3.08e-08	0.0542	0.0098	C	T	0.1834	2.7e-14	-0.087274	0.011465	B2	MAPT	yes
rs62063851	17	44074435	C	G	0.7744	3.34e-08	0.0541	0.0098	G	C	0.187	3.09e-14	-0.087054	0.011463	B2	MAPT	yes
rs62063852	17	44074581	A	G	0.7745	3.75e-08	0.0539	0.0098	G	A	0.1834	3.01e-14	-0.087099	0.011463	B2	MAPT	yes
rs62063853	17	44074613	A	G	0.7749	2.2e-08	0.0549	0.0098	G	A	0.1831	2.54e-14	-0.087426	0.011473	B2	MAPT	yes
rs62063854	17	44074619	A	G	0.2251	2.2e-08	-0.0549	0.0098	A	G	0.1831	2.85e-14	-0.087271	0.011475	B2	MAPT	yes
rs2004673	17	44075099	T	C	0.7746	2.32e-08	0.0548	0.0098	C	T	0.1833	2.66e-14	-0.087329	0.011469	B2	MAPT	yes
rs2004674	17	44075110	A	T	0.7746	2.32e-08	0.0548	0.0098	T	A	0.1869	3.33e-14	-0.08701	0.011471	B2	MAPT	yes
rs62063855	17	44075535	T	C	0.7744	2.56e-08	0.0546	0.0098	C	T	0.1834	4.93e-09	-0.075348	0.012881	B2	MAPT	yes
rs1078269	17	44075837	T	C	0.7744	2.45e-08	0.0547	0.0098	C	T	0.1834	8.44e-09	-0.074283	0.012898	B2	MAPT	yes
rs1078268	17	44075901	A	G	0.7745	2.66e-08	0.0545	0.0098	G	A	0.1834	6.89e-14	-0.085965	0.011477	B2	MAPT	yes
rs62063856	17	44076466	A	G	0.7745	2.35e-08	0.0547	0.0098	G	A	0.1834	3.17e-14	-0.087007	0.011461	B2	MAPT	yes
rs62063857	17	44076665	A	G	0.7743	2.17e-08	0.0548	0.0098	G	A	0.1836	3.87e-14	-0.086675	0.011457	B2	STH	yes
rs79959255	17	44077708	T	G	0.2256	2.24e-08	-0.0548	0.0098	T	G	0.1834	4.68e-14	-0.086424	0.011461	B2	MAPT	yes
rs56301633	17	44077850	A	G	0.2246	1.45e-08	-0.0557	0.0098	A	G	0.1898	3.97e-08	-0.07138	0.012997	B2	MAPT	yes
rs56108300	17	44077851	A	T	0.2246	1.52e-08	-0.0556	0.0098	A	T	0.1828	3.94e-14	-0.086905	0.011491	B2	MAPT	yes
rs62063859	17	44078616	A	G	0.2255	2.15e-08	-0.0549	0.0098	A	G	0.1834	4.53e-14	-0.086469	0.011461	B2	MAPT	yes
rs62064660	17	44078832	A	G	0.2255	2.24e-08	-0.0548	0.0098	A	G	0.1837	3.22e-14	-0.087116	0.011479	B2	MAPT	yes
rs62064661	17	44078892	A	G	0.2255	2.36e-08	-0.0547	0.0098	A	G	0.1835	4.13e-14	-0.08661	0.011461	B2	MAPT	yes
rs17573447	17	44079567	T	C	0.2256	2.8e-08	-0.0544	0.0098	T	C	0.1839	6.48e-14	-0.086056	0.011477	B2	MAPT	yes
rs62064662	17	44079721	A	G	0.7745	2.22e-08	0.0548	0.0098	G	A	0.1834	4.23e-14	-0.08657	0.011461	B2	MAPT	yes
rs62064663	17	44080039	T	G	0.7743	2.03e-08	0.055	0.0098	G	T	0.1838	2.36e-14	-0.087622	0.011485	B2	MAPT	yes
rs113894932	17	44080408	C	G	0.2255	2.87e-08	-0.0544	0.0098	C	G	0.1891	4.66e-13	-0.083598	0.011555	B2	MAPT	yes
rs8070723	17	44081064	A	G	0.7728	1.97e-08	0.0548	0.0098	G	A	0.1841	1.29e-13	-0.084632	0.011426	B2	MAPT	yes
rs62064664	17	44081462	T	C	0.7745	2.11e-08	0.0549	0.0098	C	T	0.1834	3.8e-14	-0.086814	0.011471	B2	MAPT	yes
rs62064665	17	44081527	T	C	0.7745	2.19e-08	0.0548	0.0098	C	T	0.1834	4.46e-14	-0.086578	0.011472	B2	MAPT	yes
rs111324579	17	44082181	A	G	0.7745	2.35e-08	0.0547	0.0098	G	A	0.1835	4.11e-14	-0.08669	0.011471	B2	MAPT	yes
rs113201171	17	44082249	A	T	0.7746	1.69e-08	0.0553	0.0098	T	A	0.187	5.87e-14	-0.086195	0.011476	B2	MAPT	yes
rs62064666	17	44082514	T	C	0.7746	1.99e-08	0.055	0.0098	C	T	0.1833	4.07e-14	-0.086736	0.011475	B2	MAPT	yes
rs62064667	17	44082528	A	T	0.7743	3.28e-08	0.0542	0.0098	T	A	0.188	1.31e-13	-0.085323	0.011522	B2	MAPT	yes
rs17573593	17	44082603	A	C	0.7745	2.1e-08	0.0549	0.0098	C	A	0.1834	4.44e-14	-0.086571	0.01147	B2	MAPT	yes
rs62064668	17	44082981	A	G	0.2255	1.83e-08	-0.0552	0.0098	A	G	0.1837	5.13e-09	-0.075471	0.012917	B2	MAPT	yes
rs17573607	17	44083081	A	G	0.2251	2.76e-08	-0.0545	0.0098	A	G	0.183	6.65e-14	-0.086102	0.011489	B2	MAPT	yes
rs17652337	17	44083323	T	C	0.2264	3.56e-08	-0.0541	0.0098	T	C	0.1829	4.17e-12	-0.085445	0.012327	B2	MAPT	yes
rs1991556	17	44083402	A	G	0.2264	2.66e-08	-0.0549	0.0099	A	G	0.1854	6.21e-12	-0.084911	0.012351	B2	MAPT	yes
rs74829364	17	44084533	T	C	0.7745	2.12e-08	0.0549	0.0098	C	T	0.2166	4.98e-13	-0.083655	0.011577	B2	MAPT	yes
rs62064669	17	44084676	T	C	0.2255	2.11e-08	-0.0549	0.0098	T	C	0.1834	6.26e-14	-0.086079	0.011473	B2	MAPT	yes
rs78962882	17	44084844	C	G	0.2255	2.14e-08	-0.0549	0.0098	C	G	0.1834	4.67e-14	-0.086495	0.01147	B2	MAPT	yes
rs78136862	17	44085743	T	C	0.7745	2.07e-08	0.0549	0.0098	C	T	0.1817	9.91e-09	-0.074011	0.012911	B2	MAPT	yes
rs62064670	17	44085852	A	T	0.2255	2.05e-08	-0.055	0.0098	A	T	0.2047	1.04e-08	-0.074298	0.01298	B2	MAPT	yes
rs62064671	17	44086100	T	C	0.7745	2.08e-08	0.0549	0.0098	C	T	0.1834	5.4e-14	-0.086276	0.01147	B2	MAPT	yes
rs62064672	17	44086521	A	G	0.2255	2.06e-08	-0.0549	0.0098	A	G	0.1834	6.47e-14	-0.086013	0.011471	B2	MAPT	yes
rs62064674	17	44088772	A	C	0.2255	2.05e-08	-0.055	0.0098	A	C	0.1833	5.56e-14	-0.086238	0.011471	B2	MAPT	yes
rs62064675	17	44088926	T	C	0.2256	1.86e-08	-0.0551	0.0098	T	C	0.1833	3.54e-14	-0.086954	0.011476	B2	MAPT	yes
rs17652449	17	44088937	C	G	0.2254	1.96e-08	-0.055	0.0098	C	G	0.1906	4.57e-08	-0.070903	0.012969	B2	MAPT	yes
rs76723223	17	44089108	T	C	0.7745	2.01e-08	0.055	0.0098	C	T	0.1836	3.66e-14	-0.087	0.011489	B2	MAPT	yes
rs733966	17	44089563	T	C	0.2255	2e-08	-0.055	0.0098	T	C	0.1834	6.83e-14	-0.085937	0.011472	B2	MAPT	yes
rs733967	17	44089690	T	C	0.7745	1.81e-08	0.0552	0.0098	C	T	0.1833	1.17e-08	-0.073625	0.012907	B2	MAPT	yes
rs733968	17	44089715	T	C	0.2255	2.06e-08	-0.0549	0.0098	T	C	0.1833	1.14e-08	-0.073688	0.012907	B2	MAPT	yes
rs733969	17	44089727	A	G	0.2256	2.34e-08	-0.0547	0.0098	A	G	0.1834	7.15e-14	-0.085868	0.011472	B2	MAPT	yes
rs4283261	17	44089921	T	C	0.2254	1.93e-08	-0.0551	0.0098	T	C	0.1834	7.1e-14	-0.085881	0.011472	B2	MAPT	yes
rs75666751	17	44090148	A	C	0.7744	2.17e-08	0.0549	0.0098	C	A	0.2048	1.07e-08	-0.074136	0.012961	B2	MAPT	yes
rs4306559	17	44090236	T	C	0.7746	1.91e-08	0.0551	0.0098	C	T	0.1833	7.6e-09	-0.074466	0.01289	B2	MAPT	yes
rs747152	17	44090339	T	C	0.7745	2.01e-08	0.055	0.0098	C	T	0.1835	5.31e-14	-0.086292	0.011469	B2	MAPT	yes
rs12150254	17	44090455	T	C	0.7746	2.02e-08	0.055	0.0098	C	T	0.1825	2.88e-12	-0.086046	0.012321	B2	MAPT	yes
rs12150506	17	44090536	A	G	0.2255	2.3e-08	-0.0548	0.0098	A	G	0.1834	6.4e-14	-0.086031	0.011471	B2	MAPT	yes
rs12150170	17	44090646	A	G	0.7745	2.07e-08	0.0549	0.0098	G	A	0.1834	5.07e-14	-0.086385	0.011472	B2	MAPT	yes
rs12150515	17	44090685	T	G	0.2255	2.01e-08	-0.055	0.0098	T	G	0.1834	5.59e-14	-0.086243	0.011472	B2	MAPT	yes
rs62062266	17	44090704	A	G	0.7745	2.05e-08	0.0549	0.0098	G	A	0.1834	6.54e-14	-0.086018	0.011474	B2	MAPT	yes
rs17573858	17	44090796	T	C	0.7745	2.01e-08	0.055	0.0098	C	T	0.1834	4.49e-14	-0.086546	0.011469	B2	MAPT	yes
rs62062267	17	44090854	T	C	0.2255	1.78e-08	-0.0552	0.0098	T	C	0.1833	5.43e-14	-0.086281	0.011472	B2	MAPT	yes
rs62062268	17	44090858	T	C	0.2254	1.9e-08	-0.0551	0.0098	T	C	0.1833	5.23e-14	-0.086334	0.011471	B2	MAPT	yes
rs62062269	17	44091092	C	G	0.2255	2.03e-08	-0.055	0.0098	C	G	0.1834	5.51e-14	-0.086251	0.011471	B2	MAPT	yes
rs62062270	17	44091195	T	C	0.7745	1.99e-08	0.055	0.0098	C	T	0.1834	4.8e-14	-0.086452	0.01147	B2	MAPT	yes
rs75534191	17	44091724	A	G	0.2255	2.02e-08	-0.055	0.0098	A	G	0.1834	4.68e-14	-0.086488	0.01147	B2	MAPT	yes
rs9891103	17	44091886	T	C	0.2331	4.04e-08	-0.0533	0.0097	T	C	0.1883	1.8e-14	-0.087187	0.011376	B2	MAPT	yes
rs62062271	17	44091988	T	C	0.7672	1.22e-08	0.056	0.0098	C	T	0.1965	9.51e-13	-0.086281	0.012089	B2	MAPT	yes
rs12150469	17	44092497	T	C	0.7745	2.07e-08	0.0549	0.0098	C	T	0.1833	7.55e-09	-0.074479	0.01289	B2	MAPT	yes
rs12149995	17	44092801	A	G	0.2257	1.59e-08	-0.0554	0.0098	A	G	0.1834	8.12e-14	-0.085659	0.01147	B2	MAPT	yes
rs62062274	17	44093319	A	G	0.2255	2.05e-08	-0.0549	0.0098	A	G	0.1834	3.35e-14	-0.087004	0.011472	B2	MAPT	yes
rs62062275	17	44093496	A	G	0.7745	2.04e-08	0.055	0.0098	G	A	0.1833	4.64e-14	-0.086506	0.011471	B2	MAPT	yes
rs62062276	17	44093627	A	G	0.7746	2.05e-08	0.055	0.0098	G	A	0.1833	4.43e-14	-0.086597	0.011473	B2	MAPT	yes
rs62062278	17	44093860	A	G	0.7746	2.23e-08	0.0548	0.0098	G	A	0.1833	3.58e-14	-0.086901	0.011472	B2	MAPT	yes
rs62062281	17	44094112	A	G	0.7745	2.16e-08	0.0549	0.0098	G	A	0.1834	5.21e-14	-0.086352	0.011473	B2	MAPT	yes
rs62062282	17	44094374	A	G	0.7745	2.03e-08	0.055	0.0098	G	A	0.1834	4.47e-14	-0.08656	0.01147	B2	MAPT	yes
rs17652502	17	44094471	A	G	0.2255	1.96e-08	-0.055	0.0098	A	G	0.1834	6.01e-14	-0.086149	0.011474	B2	MAPT	yes
rs2316948	17	44094667	C	G	0.7746	2.08e-08	0.0549	0.0098	G	C	0.187	4.95e-14	-0.086425	0.011472	B2	MAPT	yes
rs62062283	17	44095055	A	C	0.225	1.45e-08	-0.0556	0.0098	A	C	0.1832	1.02e-08	-0.073999	0.01292	B2	MAPT	yes
rs111976319	17	44095335	A	C	0.2254	2.26e-08	-0.0548	0.0098	A	C	0.1834	5.37e-09	-0.075227	0.012892	B2	MAPT	yes
rs58879558	17	44095467	T	C	0.767	2.99e-09	0.0575	0.0097	C	T	0.2136	5.86e-09	-0.075138	0.012909	B2	MAPT	yes
rs62062284	17	44095570	A	G	0.2255	1.91e-08	-0.0551	0.0098	A	G	0.1834	4.77e-14	-0.086468	0.011471	B2	MAPT	yes
rs62062285	17	44095661	T	G	0.7745	2.09e-08	0.0549	0.0098	G	T	0.1834	3.88e-14	-0.086778	0.011471	B2	MAPT	yes
rs62062286	17	44096486	T	C	0.2257	2.23e-08	-0.0549	0.0098	T	C	0.1836	4.79e-14	-0.086444	0.011469	B2	MAPT	yes
rs62062288	17	44096553	A	G	0.2185	1.86e-08	-0.0563	0.01	A	G	0.1778	8.9e-13	-0.089831	0.01257	B2	MAPT	yes
rs62062289	17	44097235	C	G	0.2252	1.88e-08	-0.0552	0.0098	C	G	0.1833	7.64e-09	-0.074488	0.012896	B2	MAPT	yes
rs78590209	17	44098862	A	G	0.7748	1.93e-08	0.0551	0.0098	G	A	0.1833	2.44e-14	-0.087555	0.011482	B2	MAPT	yes
rs17652520	17	44098967	A	G	0.229	1.23e-08	-0.0558	0.0098	A	G	0.1877	2.14e-13	-0.084008	0.011446	B2	MAPT	yes
rs17573907	17	44099082	T	C	0.2253	2.28e-08	-0.0548	0.0098	T	C	0.1825	2.87e-12	-0.086081	0.012325	B2	MAPT	yes
rs62062290	17	44099129	A	C	0.2251	2.47e-08	-0.0547	0.0098	A	C	0.183	4.21e-14	-0.086742	0.011482	B2	MAPT	yes
rs55726761	17	44099669	A	G	0.2252	2.28e-08	-0.0548	0.0098	A	G	0.2049	1.13e-08	-0.074139	0.012984	B2	MAPT	yes
rs62062292	17	44099809	A	C	0.7748	2.15e-08	0.0549	0.0098	C	A	0.1833	4.5e-14	-0.08657	0.011473	B2	MAPT	yes
rs77747656	17	44099827	C	G	0.7748	2.2e-08	0.0549	0.0098	G	C	0.187	7.25e-09	-0.074593	0.012894	B2	MAPT	yes
rs62062293	17	44100553	A	C	0.2252	2.32e-08	-0.0548	0.0098	A	C	0.1833	4.24e-14	-0.086669	0.011474	B2	MAPT	yes
rs62062294	17	44100666	A	C	0.7748	2.17e-08	0.0549	0.0098	C	A	0.1833	5.7e-14	-0.086221	0.011474	B2	MAPT	yes
rs62062295	17	44100906	A	G	0.7747	2.22e-08	0.0549	0.0098	G	A	0.1833	4.79e-14	-0.086492	0.011475	B2	MAPT	yes
rs62062296	17	44100916	T	C	0.2252	2.04e-08	-0.055	0.0098	T	C	0.1833	7.05e-14	-0.085926	0.011477	B2	MAPT	yes
rs62062297	17	44101004	A	G	0.7748	2.17e-08	0.0549	0.0098	G	A	0.1833	4.58e-14	-0.086554	0.011474	B2	MAPT	yes
rs9468	17	44101563	T	C	0.7744	2.04e-08	0.055	0.0098	C	T	0.1869	2.42e-13	-0.083921	0.01146	B2	MAPT	yes
rs8712	17	44101871	A	G	0.7749	2.13e-08	0.055	0.0098	G	A	0.1866	4.23e-08	-0.070731	0.012905	B2	MAPT	yes
rs1052587	17	44102604	T	C	0.7747	2.04e-08	0.055	0.0098	C	T	0.1834	3.79e-14	-0.086726	0.01146	B2	MAPT	yes
rs1052590	17	44102638	A	G	0.7748	2.2e-08	0.0549	0.0098	G	A	0.1832	6.11e-14	-0.086137	0.011476	B2	MAPT	yes
rs1052594	17	44102689	C	G	0.2252	2.16e-08	-0.0549	0.0098	C	G	0.1833	6.53e-14	-0.086032	0.011476	B2	MAPT	yes
rs17574040	17	44102865	A	C	0.7747	1.87e-08	0.0552	0.0098	C	A	0.1833	4.67e-14	-0.086517	0.011473	B2	MAPT	yes
rs7687	17	44103296	T	C	0.7748	2.22e-08	0.0549	0.0098	C	T	0.1833	7.12e-14	-0.085984	0.011487	B2	MAPT	yes
rs17652748	17	44103616	T	C	0.2252	2.32e-08	-0.0548	0.0098	T	C	0.1825	3.53e-12	-0.085738	0.012328	B2	MAPT	yes
rs75010486	17	44103825	T	C	0.7759	1.78e-08	0.0555	0.0098	C	T	0.1826	4.92e-14	-0.086701	0.011508	B2	MAPT	yes
rs16940806	17	44103826	A	G	0.2241	1.78e-08	-0.0555	0.0098	A	G	0.1826	5.16e-14	-0.086642	0.01151	B2	MAPT	yes
rs2158257	17	44104343	A	C	0.7748	2.16e-08	0.0549	0.0098	C	A	0.1833	5.07e-14	-0.086391	0.011473	B2	MAPT	yes
rs17574228	17	44104509	T	C	0.7748	2.16e-08	0.0549	0.0098	C	T	0.1833	4.65e-14	-0.086513	0.011472	B2	MAPT	yes
rs78681971	17	44106219	T	C	0.2252	2.06e-08	-0.055	0.0098	T	C	0.1833	5.67e-14	-0.086278	0.01148	B2	MAPT	yes
rs79772576	17	44106220	A	G	0.7745	2.47e-08	0.0547	0.0098	G	A	0.1834	6.59e-14	-0.086074	0.011483	B2	MAPT	yes
rs78229689	17	44106806	A	G	0.2253	2.78e-08	-0.0545	0.0098	A	G	0.1834	7.67e-14	-0.085793	0.011476	B2	KANSL1	yes
rs7350928	17	44108100	T	C	0.2253	1.9e-08	-0.0551	0.0098	T	C	0.1833	4.71e-14	-0.086569	0.011482	B2	KANSL1	yes
rs17574361	17	44108202	A	G	0.7748	2.16e-08	0.0549	0.0098	G	A	0.1827	2.08e-12	-0.086786	0.012347	B2	KANSL1	yes
rs17652961	17	44108355	A	G	0.2252	2.1e-08	-0.055	0.0098	A	G	0.1833	4.36e-14	-0.086615	0.011472	B2	KANSL1	yes
rs34579536	17	44108906	A	G	0.7741	2.56e-08	0.0546	0.0098	G	A	0.1837	2.29e-08	-0.072055	0.012894	B2	KANSL1	yes
rs17574425	17	44109188	C	G	0.7748	2.09e-08	0.055	0.0098	G	C	0.1879	5.73e-09	-0.075247	0.012919	B2	KANSL1	yes
rs55881134	17	44109248	A	G	0.2252	2.14e-08	-0.0549	0.0098	A	G	0.1833	5.25e-14	-0.086346	0.011474	B2	KANSL1	yes
rs1076222	17	44109769	C	G	0.7749	2.07e-08	0.055	0.0098	G	C	0.187	1.35e-08	-0.073342	0.012913	B2	KANSL1	yes
rs7350980	17	44110271	A	G	0.2319	4.85e-08	-0.0531	0.0097	A	G	0.1876	2.85e-14	-0.086732	0.011404	B2	KANSL1	yes
rs36076725	17	44110532	A	G	0.2254	1.93e-08	-0.0551	0.0098	A	G	0.1833	6.31e-14	-0.086093	0.011477	B2	KANSL1	yes
rs35833914	17	44110541	A	G	0.2254	1.96e-08	-0.055	0.0098	A	G	0.1833	8.12e-14	-0.085725	0.011479	B2	KANSL1	yes
rs4597358	17	44110670	C	G	0.7681	4.84e-08	0.0531	0.0097	G	C	0.1907	2.06e-14	-0.087065	0.011385	B2	KANSL1	yes
rs77009866	17	44110888	A	T	0.7748	2.12e-08	0.055	0.0098	T	A	0.187	4.72e-14	-0.086501	0.011473	B2	KANSL1	yes
rs62062321	17	44111109	A	G	0.7748	2.15e-08	0.0549	0.0098	G	A	0.1833	4.55e-14	-0.086547	0.011472	B2	KANSL1	yes
rs17574604	17	44111613	A	G	0.7746	1.95e-08	0.055	0.0098	G	A	0.1833	3.2e-14	-0.087117	0.011478	B2	KANSL1	yes
rs17653162	17	44111827	A	C	0.2252	2.19e-08	-0.0549	0.0098	A	C	0.1833	5.11e-14	-0.086387	0.011474	B2	KANSL1	yes
rs62062322	17	44112385	A	G	0.7748	2.13e-08	0.0549	0.0098	G	A	0.1833	5.46e-14	-0.086281	0.011473	B2	KANSL1	yes
rs17653193	17	44112441	A	G	0.2252	2.13e-08	-0.0549	0.0098	A	G	0.1836	7.81e-14	-0.085716	0.011469	B2	KANSL1	yes
rs17653211	17	44112638	T	C	0.7748	2.1e-08	0.055	0.0098	C	T	0.1825	3.07e-12	-0.085953	0.012324	B2	KANSL1	yes
rs17653255	17	44112743	A	C	0.2252	2.13e-08	-0.0549	0.0098	A	C	0.1833	4.46e-14	-0.08658	0.011472	B2	KANSL1	yes
rs4608377	17	44113359	T	C	0.7748	2.13e-08	0.0549	0.0098	C	T	0.1833	5.04e-14	-0.08641	0.011474	B2	KANSL1	yes
rs12185225	17	44113491	T	C	0.7748	2.15e-08	0.0549	0.0098	C	T	0.1833	4.29e-14	-0.086637	0.011472	B2	KANSL1	yes
rs12150438	17	44113963	T	C	0.2252	2.17e-08	-0.0549	0.0098	T	C	0.1833	4.73e-14	-0.08649	0.011472	B2	KANSL1	yes
rs12150162	17	44114218	T	C	0.7748	2.19e-08	0.0549	0.0098	C	T	0.1833	4.92e-14	-0.086437	0.011473	B2	KANSL1	yes
rs62062324	17	44114362	A	T	0.7761	4.42e-08	0.0546	0.01	T	A	0.1841	3.59e-08	-0.076678	0.013916	B2	KANSL1	yes
rs62062325	17	44114364	A	C	0.2239	4.38e-08	-0.0546	0.01	A	C	0.1802	3.54e-08	-0.076709	0.013916	B2	KANSL1	yes
rs62062134	17	44114432	A	C	0.7748	2.26e-08	0.0548	0.0098	C	A	0.1833	4.46e-14	-0.086588	0.011473	B2	KANSL1	yes
rs17574796	17	44115074	T	C	0.7748	2.46e-08	0.0547	0.0098	C	T	0.1833	5.01e-14	-0.086404	0.011472	B2	KANSL1	yes
rs17574824	17	44115107	T	C	0.2253	2.22e-08	-0.0549	0.0098	T	C	0.1833	4.39e-14	-0.086603	0.011472	B2	KANSL1	yes
rs12185243	17	44115351	T	C	0.775	2.35e-08	0.0548	0.0098	C	T	0.1825	3.11e-12	-0.085964	0.012329	B2	KANSL1	yes
rs11079729	17	44115569	A	C	0.2252	2.22e-08	-0.0549	0.0098	A	C	0.1834	5.8e-14	-0.086203	0.011474	B2	KANSL1	yes
rs12150542	17	44115730	A	G	0.2252	2.26e-08	-0.0548	0.0098	A	G	0.1833	4.82e-14	-0.086463	0.011472	B2	KANSL1	yes
rs41437445	17	44116238	A	G	0.2252	2.21e-08	-0.0549	0.0098	A	G	0.1834	4.49e-14	-0.086571	0.011473	B2	KANSL1	yes
rs62062136	17	44116312	T	C	0.7748	2.12e-08	0.055	0.0098	C	T	0.1833	4.06e-14	-0.086716	0.011472	B2	KANSL1	yes
rs7221390	17	44116950	T	G	0.768	4.87e-08	0.0531	0.0097	G	T	0.1872	1.11e-08	-0.073045	0.012785	B2	KANSL1	yes
rs34043286	17	44117119	A	G	0.7746	2.11e-08	0.0549	0.0098	G	A	0.1835	5.26e-14	-0.086313	0.01147	B2	KANSL1	yes
rs10514897	17	44117397	A	G	0.7748	2.28e-08	0.0548	0.0098	G	A	0.1833	4.78e-14	-0.086485	0.011473	B2	KANSL1	yes
rs62062137	17	44118848	A	G	0.2252	1.78e-08	-0.0553	0.0098	A	G	0.1832	2.44e-14	-0.087547	0.011482	B2	KANSL1	yes
rs41382552	17	44118999	A	G	0.7748	2.43e-08	0.0547	0.0098	G	A	0.1833	5.06e-14	-0.0864	0.011473	B2	KANSL1	yes
rs55893711	17	44119320	T	C	0.2252	2.31e-08	-0.0548	0.0098	T	C	0.1834	7.73e-09	-0.074453	0.012894	B2	KANSL1	yes
rs10514898	17	44119636	A	C	0.7748	2.21e-08	0.0549	0.0098	C	A	0.1833	4.51e-14	-0.086568	0.011473	B2	KANSL1	yes
rs41374248	17	44120442	A	G	0.7748	2.3e-08	0.0548	0.0098	G	A	0.1833	4.54e-14	-0.08656	0.011473	B2	KANSL1	yes
rs79252344	17	44120608	A	G	0.7748	2.13e-08	0.0549	0.0098	G	A	0.1833	5.21e-14	-0.086348	0.011473	B2	KANSL1	yes
rs41399444	17	44121469	T	C	0.2252	2.26e-08	-0.0548	0.0098	T	C	0.1835	7.08e-09	-0.0746	0.012887	B2	KANSL1	yes
rs77768866	17	44121917	T	C	0.2253	2.61e-08	-0.0546	0.0098	T	C	0.1833	7.02e-09	-0.074661	0.012894	B2	KANSL1	yes
rs62063668	17	44122484	T	C	0.2252	2.59e-08	-0.0546	0.0098	T	C	0.1833	6.52e-14	-0.086039	0.011476	B2	KANSL1	yes
rs62063670	17	44123248	T	C	0.7748	2.46e-08	0.0547	0.0098	C	T	0.1833	7.84e-14	-0.085761	0.011476	B2	KANSL1	yes
rs74571696	17	44123685	A	G	0.2252	2.46e-08	-0.0547	0.0098	A	G	0.1833	7.23e-14	-0.085879	0.011476	B2	KANSL1	yes
rs79698033	17	44123717	T	C	0.2252	2.54e-08	-0.0547	0.0098	T	C	0.1833	6.84e-14	-0.085973	0.011477	B2	KANSL1	yes
rs79065019	17	44124535	T	C	0.7746	1.75e-08	0.0553	0.0098	C	T	0.1834	2.81e-14	-0.087307	0.011477	B2	KANSL1	yes
rs112578465	17	44125066	T	C	0.2252	2.73e-08	-0.0545	0.0098	T	C	0.1833	5.39e-14	-0.086317	0.011475	B2	KANSL1	yes
rs62063673	17	44125484	T	G	0.7747	2.62e-08	0.0546	0.0098	G	T	0.1833	7.55e-09	-0.074504	0.012894	B2	KANSL1	yes
rs12150336	17	44125704	T	C	0.2251	2.62e-08	-0.0546	0.0098	T	C	0.1832	6.02e-14	-0.086247	0.011488	B2	KANSL1	yes
rs12150570	17	44126218	A	G	0.2252	2.84e-08	-0.0545	0.0098	A	G	0.1833	4.64e-14	-0.086521	0.011472	B2	KANSL1	yes
rs7218319	17	44126365	T	C	0.2319	4.79e-08	-0.0531	0.0097	T	C	0.187	3.19e-14	-0.086453	0.01139	B2	KANSL1	yes
rs74977736	17	44126977	C	G	0.2251	2.77e-08	-0.0545	0.0098	C	G	0.1833	6.56e-14	-0.086064	0.011481	B2	KANSL1	yes
rs12150447	17	44128125	A	C	0.7748	2.71e-08	0.0545	0.0098	C	A	0.1833	7.46e-09	-0.07453	0.012894	B2	KANSL1	yes
rs12150064	17	44128407	A	C	0.2253	2.38e-08	-0.0548	0.0098	A	C	0.1833	7.66e-09	-0.074475	0.012894	B2	KANSL1	yes
rs17653836	17	44128876	A	T	0.2253	2.4e-08	-0.0547	0.0098	A	T	0.183	3.66e-14	-0.086945	0.011482	B2	KANSL1	yes
rs17575423	17	44129253	T	C	0.7747	2.36e-08	0.0548	0.0098	C	T	0.1832	4.42e-14	-0.086625	0.011476	B2	KANSL1	yes
rs62063676	17	44129800	A	G	0.2252	2.27e-08	-0.0548	0.0098	A	G	0.1832	7.71e-09	-0.074484	0.012898	B2	KANSL1	yes
rs62063677	17	44129885	T	C	0.2252	2.41e-08	-0.0547	0.0098	T	C	0.1832	4.77e-14	-0.086516	0.011477	B2	KANSL1	yes
rs62063678	17	44129949	C	G	0.7747	2.87e-08	0.0544	0.0098	G	C	0.1946	2.26e-13	-0.084886	0.011577	B2	KANSL1	yes
rs79649865	17	44130587	T	G	0.7748	2.29e-08	0.0548	0.0098	G	T	0.1832	5.9e-14	-0.086226	0.011481	B2	KANSL1	yes
rs111853996	17	44130878	A	G	0.7748	2.46e-08	0.0547	0.0098	G	A	0.1832	4.77e-14	-0.08654	0.01148	B2	KANSL1	yes
rs112674766	17	44130924	A	T	0.7748	2.29e-08	0.0548	0.0098	T	A	0.1871	8.42e-09	-0.074288	0.012898	B2	KANSL1	yes
rs112074397	17	44131022	T	C	0.7748	2.38e-08	0.0548	0.0098	C	T	0.1832	4.88e-14	-0.086486	0.011478	B2	KANSL1	yes
rs62063680	17	44131559	A	C	0.2252	2.56e-08	-0.0546	0.0098	A	C	0.1832	7.17e-09	-0.074645	0.012899	B2	KANSL1	yes
rs62063681	17	44131592	A	G	0.7748	2.39e-08	0.0548	0.0098	G	A	0.1832	4.6e-14	-0.086563	0.011476	B2	KANSL1	yes
rs62063682	17	44131622	A	G	0.2252	2.64e-08	-0.0546	0.0098	A	G	0.1832	3.89e-14	-0.086816	0.011477	B2	KANSL1	yes
rs62063683	17	44131717	A	G	0.2251	2.35e-08	-0.0548	0.0098	A	G	0.1832	4.85e-14	-0.086492	0.011477	B2	KANSL1	yes
rs79180862	17	44131798	T	C	0.2252	2.39e-08	-0.0548	0.0098	T	C	0.1832	4.19e-14	-0.086695	0.011475	B2	KANSL1	yes
rs62063684	17	44132269	T	C	0.7749	2.19e-08	0.0549	0.0098	C	T	0.1826	5.55e-09	-0.075363	0.012927	B2	KANSL1	yes
rs62063685	17	44132379	A	G	0.7747	2.73e-08	0.0545	0.0098	G	A	0.1833	7.35e-09	-0.074593	0.012899	B2	KANSL1	yes
rs62063687	17	44132592	A	G	0.7748	2.43e-08	0.0547	0.0098	G	A	0.1832	7.78e-09	-0.074583	0.012919	B2	KANSL1	yes
rs62060760	17	44132887	T	C	0.2252	2.4e-08	-0.0547	0.0098	T	C	0.1832	6e-14	-0.086187	0.011479	B2	KANSL1	yes
rs17575437	17	44133031	A	T	0.2252	2.36e-08	-0.0548	0.0098	A	T	0.1832	5.97e-14	-0.086184	0.011478	B2	KANSL1	yes
rs17653889	17	44133070	A	T	0.7748	2.26e-08	0.0548	0.0098	T	A	0.1869	6.68e-14	-0.086017	0.011478	B2	KANSL1	yes
rs17653906	17	44133142	A	G	0.2252	2.21e-08	-0.0549	0.0098	A	G	0.1833	6.37e-14	-0.086084	0.011478	B2	KANSL1	yes
rs62060761	17	44133162	A	C	0.7748	2.29e-08	0.0548	0.0098	C	A	0.1832	7.87e-14	-0.08577	0.011478	B2	KANSL1	yes
rs62060762	17	44133396	A	G	0.2252	2.17e-08	-0.0549	0.0098	A	G	0.1833	1.15e-13	-0.085213	0.011481	B2	KANSL1	yes
rs62060763	17	44133403	T	C	0.7748	2.27e-08	0.0548	0.0098	C	T	0.1833	7.93e-14	-0.08576	0.011478	B2	KANSL1	yes
rs111259120	17	44133534	T	C	0.2252	2.42e-08	-0.0547	0.0098	T	C	0.1833	5.97e-14	-0.086177	0.011477	B2	KANSL1	yes
rs62060764	17	44133633	A	G	0.7748	2.36e-08	0.0548	0.0098	G	A	0.1833	5.41e-14	-0.086322	0.011477	B2	KANSL1	yes
rs62060765	17	44133648	A	C	0.7748	2.35e-08	0.0548	0.0098	C	A	0.1832	6.81e-14	-0.085987	0.011478	B2	KANSL1	yes
rs17575507	17	44134095	A	G	0.7748	2.23e-08	0.0549	0.0098	G	A	0.1824	3.76e-12	-0.085625	0.012327	B2	KANSL1	yes
rs876944	17	44134391	T	G	0.2252	2.31e-08	-0.0548	0.0098	T	G	0.1832	7.33e-09	-0.074594	0.012898	B2	KANSL1	yes
rs62060767	17	44134910	A	G	0.2252	2.33e-08	-0.0548	0.0098	A	G	0.1835	6.42e-14	-0.086242	0.0115	B2	KANSL1	yes
rs62060768	17	44134984	A	G	0.2253	2.3e-08	-0.0548	0.0098	A	G	0.1832	7.63e-09	-0.074626	0.012919	B2	KANSL1	yes
rs62060769	17	44135026	C	G	0.2252	2.33e-08	-0.0548	0.0098	C	G	0.1832	7.57e-14	-0.085842	0.01148	B2	KANSL1	yes
rs1107820	17	44135359	T	C	0.7748	2.35e-08	0.0548	0.0098	C	T	0.1832	5.47e-14	-0.086297	0.011475	B2	KANSL1	yes
rs17575556	17	44135827	A	G	0.2252	2.35e-08	-0.0548	0.0098	A	G	0.1833	5.59e-14	-0.086275	0.011477	B2	KANSL1	yes
rs17653998	17	44135985	A	G	0.7748	2.19e-08	0.0549	0.0098	G	A	0.1832	4.88e-14	-0.086475	0.011476	B2	KANSL1	yes
rs111372048	17	44136577	A	C	0.7748	1.88e-08	0.0552	0.0098	C	A	0.1832	4.17e-14	-0.086708	0.011476	B2	KANSL1	yes
rs62060785	17	44136634	A	G	0.2252	2.21e-08	-0.0549	0.0098	A	G	0.1832	4.71e-14	-0.086544	0.011479	B2	KANSL1	yes
rs62060786	17	44136763	T	C	0.2252	2.21e-08	-0.0549	0.0098	T	C	0.1832	5.66e-14	-0.086283	0.01148	B2	KANSL1	yes
rs62060787	17	44136803	T	G	0.2252	2.24e-08	-0.0549	0.0098	T	G	0.1832	7.14e-09	-0.074654	0.012899	B2	KANSL1	yes
rs41384744	17	44137070	A	G	0.7747	2.12e-08	0.055	0.0098	G	A	0.1911	4.3e-08	-0.071112	0.012982	B2	KANSL1	yes
rs55714296	17	44137189	A	T	0.7747	2.14e-08	0.0549	0.0098	T	A	0.1878	3.33e-14	-0.087209	0.011498	B2	KANSL1	yes
rs55690782	17	44137311	A	G	0.2253	2.24e-08	-0.0549	0.0098	A	G	0.1832	6.25e-14	-0.086131	0.01148	B2	KANSL1	yes
rs17654016	17	44137925	T	C	0.7748	2.25e-08	0.0549	0.0098	C	T	0.1832	4.01e-14	-0.086765	0.011476	B2	KANSL1	yes
rs7220752	17	44138201	T	C	0.7681	3.93e-08	0.0535	0.0097	C	T	0.187	2.31e-14	-0.086937	0.011391	B2	KANSL1	yes
rs2316951	17	44139083	C	G	0.2252	2.25e-08	-0.0548	0.0098	C	G	0.1833	5.94e-14	-0.086167	0.011475	B2	KANSL1	yes
rs2316952	17	44139190	C	G	0.2252	2.24e-08	-0.0549	0.0098	C	G	0.1832	4.73e-14	-0.086521	0.011476	B2	KANSL1	yes
rs2316953	17	44140341	A	G	0.2252	2.22e-08	-0.0549	0.0098	A	G	0.1832	6.91e-09	-0.074722	0.012898	B2	KANSL1	yes
rs2838	17	44141347	A	G	0.7748	2.21e-08	0.0549	0.0098	G	A	0.1823	1.12e-11	-0.083944	0.012363	B2	KANSL1	yes
rs12150127	17	44141732	A	G	0.2252	2.27e-08	-0.0548	0.0098	A	G	0.1832	3.66e-14	-0.086919	0.011478	B2	KANSL1	yes
rs62060792	17	44141955	A	T	0.2252	2.22e-08	-0.0549	0.0098	A	T	0.1832	4.03e-14	-0.08676	0.011476	B2	KANSL1	yes
rs76307183	17	44142121	A	G	0.2252	2.23e-08	-0.0549	0.0098	A	G	0.1832	4.6e-14	-0.086572	0.011477	B2	KANSL1	yes
rs62060793	17	44142427	A	G	0.7748	2.2e-08	0.0549	0.0098	G	A	0.1832	4.34e-14	-0.08666	0.011477	B2	KANSL1	yes
rs62060794	17	44142566	T	C	0.2252	2.28e-08	-0.0548	0.0098	T	C	0.1832	4.88e-14	-0.0865	0.01148	B2	KANSL1	yes
rs62060795	17	44142663	T	C	0.2252	2.24e-08	-0.0549	0.0098	T	C	0.1832	3.92e-14	-0.086809	0.011477	B2	KANSL1	yes
rs17575773	17	44142879	T	C	0.2252	2.25e-08	-0.0548	0.0098	T	C	0.1824	3.2e-12	-0.085926	0.012331	B2	KANSL1	yes
rs62060796	17	44143029	T	G	0.2252	2.23e-08	-0.0549	0.0098	T	G	0.188	4.57e-13	-0.083722	0.011568	B2	KANSL1	yes
rs62060797	17	44143344	A	G	0.2252	2.24e-08	-0.0549	0.0098	A	G	0.1832	4.83e-14	-0.086498	0.011477	B2	KANSL1	yes
rs12150344	17	44143484	A	G	0.2252	2.24e-08	-0.0549	0.0098	A	G	0.1832	4.69e-14	-0.086533	0.011476	B2	KANSL1	yes
rs62060798	17	44144152	T	C	0.7748	2.25e-08	0.0548	0.0098	C	T	0.1832	3.22e-14	-0.087097	0.011477	B2	KANSL1	yes
rs62060799	17	44144251	T	G	0.2252	2.24e-08	-0.0549	0.0098	T	G	0.1832	3.87e-14	-0.086818	0.011476	B2	KANSL1	yes
rs17575822	17	44144345	A	G	0.7748	1.78e-08	0.0553	0.0098	G	A	0.1832	4.06e-14	-0.086749	0.011476	B2	KANSL1	yes
rs17575850	17	44144387	A	C	0.2252	1.97e-08	-0.0551	0.0098	A	C	0.1832	4.06e-14	-0.086754	0.011477	B2	KANSL1	yes
rs17659731	17	44144634	A	G	0.2252	1.87e-08	-0.0552	0.0098	A	G	0.1832	4.15e-14	-0.086721	0.011477	B2	KANSL1	yes
rs75641221	17	44145373	T	C	0.7748	1.86e-08	0.0552	0.0098	C	T	0.1832	3.8e-14	-0.086851	0.011477	B2	KANSL1	yes
[truncated: 372 more rows]

## Sheet: S6
Supplementary Table 6. Shared SNPs reached nominal associations between AD and COVID-19 in the AA population
SNP	CHR	BP(GRCh37)			AD-AA					COVID-19-AA
			A1	A2	EAF	P	BETA	SE	N	BETA	P	SE	EAF	N	COVID19_phenotype	Gene
rs11922000	3	135813999	A	G	0.1054	0.03096	0.1454	0.0674	8006	0.23646	6.7745e-06	0.052539	0.1018	125814	B2	PPP2R3A
rs61687419	3	135830856	A	G	0.1101	0.02944	0.142	0.0652	8006	0.24604	1.3816e-06	0.050964	0.1067	125814	B2	PPP2R3A
rs183265046	3	136334542	A	C	0.169	0.01937	0.1266	0.0541	8006	0.18667	2.7375e-06	0.039805	0.1718	125814	B2	STAG1
rs9295253	6	158387117	T	C	0.8656	0.005808	0.1883	0.0683	8006	0.22318	9.97e-06	0.050518	0.8649	125814	B2	SNX9;SYNJ2
rs145141839	9	97516650	T	C	0.0131	0.003409	0.5626	0.1921	8006	0.53754	9.402e-06	0.12133	0.01512	114223	B2	AOPEP
rs186997548	16	9946908	T	C	0.9894	0.04413	-0.4359	0.2166	8006	-0.39787	6.5879e-06	0.088285	0.9	117962	C2	GRIN2A
rs1038026	19	45405062	A	G	0.3836	3.045e-30	0.4578	0.0401	8006	0.35679	0.0023319	0.1172	0.352	11420	A2	TOMM40
rs9516245	13	94159800	C	T	0.039	2.53e-06	0.482	0.1024	8006	0.16783	0.035372	0.079763	0.03936	125814	B2	GPC6
rs149414269	19	45392213	G	C	0.9821	5.293e-10	-1.0706	0.1724	8006	0.17967	0.028765	0.082166	0.01577	122822	C2	NECTIN2
rs140021317	19	45398360	T	C	0.0225	1.684e-10	1.0438	0.1634	8006	0.17671	0.023869	0.078217	0.01613	124598	C2	TOMM40

## Sheet: S7
Supplementary Table 7. List of nonsynonymous SNPs in the shared chr17q21.31 region
SNP	Chr	GRCh37	Ref	Alt	Gene	AAChange	Disease	COVID-19_pheno	Gene Full name
rs62621252	17	43922942	T	C	SPPL2C	exon1:p.S224P		B2	signal peptide peptidase like 2C
rs16940681	17	43912159	G	C	LINC02210-CRHR1	exon13:p.E280Q		A2, B2	corticotropin releasing hormone receptor 1
rs62054815	17	43923266	G	A	SPPL2C	exon1:p.A332T		A2, B2	signal peptide peptidase like 2C
rs12185233	17	43923654	G	C	SPPL2C	exon1:p.R461P		A2, B2	signal peptide peptidase like 2C
rs12185268	17	43923683	A	G	SPPL2C	exon1:p.I471V		A2, B2	signal peptide peptidase like 2C
rs12373123	17	43924073	T	C	SPPL2C	exon1:p.S601P		A2, B2	signal peptide peptidase like 2C
rs12373139	17	43924130	G	A	SPPL2C	exon1:p.G620R		A2, B2	signal peptide peptidase like 2C
rs12373142	17	43924200	C	G	SPPL2C	exon1:p.P643R		A2, B2	signal peptide peptidase like 2C
rs63750417	17	44060775	C	T	MAPT	exon5:p.P277L,exon6:p.P202L	AD, FTD, PD, Pick disease of the brain, PSNP1	A2, B2	microtubule associated protein tau
rs62063786	17	44061023	G	A	MAPT	exon5:p.D360N,exon6:p.D285N	AD, FTD, PD, Pick disease of the brain, PSNP1	A2, B2	microtubule associated protein tau
rs62063787	17	44061036	T	C	MAPT	exon5:p.V364A,exon6:p.V289A	AD, FTD, PD, Pick disease of the brain, PSNP1	A2, B2	microtubule associated protein tau
rs10445337	17	44067400	T	C	MAPT	exon7:p.S522P,exon8:p.S447P	AD, FTD, PD, Pick disease of the brain, PSNP1	A2, B2	microtubule associated protein tau
rs62063857	17	44076665	A	G	STH	exon1:p.Q7R		A2, B2	saitohin
rs34043286	17	44117119	A	G	KANSL1	exon8:p.S718P		A2, B2	KAT8 regulatory NSL complex subunit 1
rs34579536	17	44108906	A	G	KANSL1	exon15:p.I1085T		B2	KAT8 regulatory NSL complex subunit 1

## Sheet: S8
Supplementary Table 8. rs12373123 phenome-wide association study from GWAS ATLAS
atlas ID	PMID	Year	Domain	Trait	P-value	N	EA	NEA
4352	30573740	2018	Dermatological	Male pattern baldness (BOLT LMM non-infinitesimal mixed model)	7.8e-189	205327	T	C
4351	30573740	2018	Dermatological	Male pattern baldness (BOLT LMM infinitesimal mixed model)	4.1e-175	205327	T	C
3500	31427789	2019	Dermatological	Male-specific factors - Hair/balding pattern: Pattern 1	1.14e-71	176380	C	T
3503	31427789	2019	Dermatological	Male-specific factors - Hair/balding pattern: Pattern 4	2.93e-63	176380	T	C
4278	30804560	2019	Respiratory	FEV1	2.03e-46	400102	T	C
4282	30804560	2019	Respiratory	FEV1	1.63e-45	321047	T	C
4279	30804560	2019	Respiratory	FVC	1.71e-43	400102	T	C
4283	30804560	2019	Respiratory	FVC	7.71e-42	321047	T	C
3412	31427789	2019	Skeletal	Sitting height	5.67e-38	385393	T	C
3231	31427789	2019	Psychiatric	Nap during day	1.75e-37	386124	T	C
3900	27863252	2016	Immunological	Red blood cell count (three-way meta)	6.38e-35	172952	C	T
3324	31427789	2019	Reproduction	Relative age of first facial hair (male)	1.21e-33	171805	C	T
3990	29500382	2018	Psychiatric	Neuroticism sum score	1.41e-30	380506	C	T
3901	27863252	2016	Immunological	Red cell distribution width (three-way meta)	4.8e-29	171529	C	T
3287	31427789	2019	Psychiatric	Sensitivity / hurt feelings	2.21e-28	375272	C	T
3864	27863252	2016	Immunological	Red blood cell count (two-way meta)	4.46e-28	132690	C	T
3795	29942085	2018	Psychiatric	Neuroticism	6.22e-28	390278	NA	NA
4072	BioRxiv: https://doi.org/10.1101/261081	2018	Activities	First PC of the four riskly behaviours	9.59e-28	315894	T	C
46	28196072	2017	Dermatological	Baldness	1.01e-27	52874	T	C
3994	29500382	2018	Psychiatric	Sensitivity / hurt feelings (HURT)	1.37e-27	264144	C	T
3879	27863252	2016	Immunological	Hematocrit (three-way meta)	2.18e-27	173039	C	T
3865	27863252	2016	Immunological	Red cell distribution width (two-way meta)	9.09e-27	131520	C	T
4175	30048462	2018	Skeletal	Heel bone mineral density	2.4e-26	394929	T	C
3880	27863252	2016	Immunological	Hemoglobin concentration (three-way meta)	4.65e-25	172925	C	T
3417	31427789	2019	Psychiatric	Neuroticism score	4.86e-24	312740	C	T
4069	BioRxiv: https://doi.org/10.1101/261081	2018	Psychiatric	Drinks per week	6.98e-24	414343	T	C
4087	29255261	2018	Psychiatric	Neuroticism	7.43e-24	329821	C	T
3876	27863252	2016	Immunological	Eosinophil percentage of granulocytes (three-way meta)	2.28e-23	170536	T	C
3894	27863252	2016	Immunological	Neutrophil percentage of granulocytes (three-way meta)	2.67e-22	170672	C	T
3875	27863252	2016	Immunological	Eosinophil percentage of white cells (three-way meta)	2.26e-21	172378	T	C
4328	30598549	2018	Skeletal	Estimated bone mineral density from heel ultrasounds	3.4e-21	426824	T	C
3797	29942085	2018	Psychiatric	Depressive affect subcluster	4.12e-21	357957	C	T
3502	31427789	2019	Dermatological	Male-specific factors - Hair/balding pattern: Pattern 3	5.91e-21	176380	T	C
4167	BioRxiv: https://doi.org/10.1101/388165	2019	Neurological	Parkinson disease of sibling pairs (tier 1)	1.64e-20	482730	T	C
4269	30867560	2019	Psychiatric	Neuroticism general factor	4.03e-20	270059	C	T
3844	27863252	2016	Immunological	Hemoglobin concentration (two-way meta)	4.5e-20	132596	C	T
3991	29500382	2018	Psychiatric	Mood swings (MOOD)	7.05e-19	265382	C	T
3284	31427789	2019	Psychiatric	Mood swings	1.3e-18	377179	C	T
3843	27863252	2016	Immunological	Hematocrit (two-way meta)	3.09e-18	132699	C	T
4306	30664634	2019	Metabolic	Trunk-trunk fat ratio (female)	3.8e-18	195068	T	C
3312	31427789	2019	Activities	Electronic device use - Plays computer games	8.98e-18	386152	C	T
3858	27863252	2016	Immunological	Neutrophil percentage of granulocytes (two-way meta)	4.2e-17	131660	C	T
4317	30643251	2019	Psychiatric	Drinks per day	6.06e-17	537349	T	C
3840	27863252	2016	Immunological	Eosinophil percentage of granulocytes (two-way meta)	6.68e-17	131525	T	C
3570	31427789	2019	Neurological	Pain type(s) experienced in last month: Headache	1.02e-16	385698	C	T
3874	27863252	2016	Immunological	Eosinophil count (three-way meta)	5.46e-16	172275	T	C
3902	27863252	2016	Immunological	Reticulocyte count (three-way meta)	1.93e-15	170641	C	T
3288	31427789	2019	Psychiatric	Fed-up feelings	2.07e-15	378357	C	T
3995	29500382	2018	Psychiatric	Fed-up feelings (FED_UP)	2.2e-15	266208	C	T
4079	30239722	2018	Metabolic	Waist-hip ratio (female)	2.39e-15	381152	C	T
3839	27863252	2016	Immunological	Eosinophil percentage of white cells (two-way meta)	4.1e-15	132052	T	C
4080	30239722	2018	Metabolic	Waist-hip ratio (adjusted for BMI)	4.62e-15	694649	C	T
3289	31427789	2019	Psychiatric	Nervous feelings	9.59e-15	376368	C	T
4077	30239722	2018	Metabolic	Waist-hip ratio	1.28e-14	697734	C	T
4082	30239722	2018	Metabolic	Waist-hip ratio (adjusted for BMI, female)	1.32e-14	379501	C	T
3996	29500382	2018	Psychiatric	Nervous feelings (NERV-FEEL)	1.41e-14	264858	C	T
3325	31427789	2019	Reproduction	Relative age voice broke (male)	1.92e-14	164394	C	T
3882	27863252	2016	Immunological	High light scatter reticulocyte count (three-way meta)	2.12e-14	170761	C	T
3451	31427789	2019	Metabolic	Impedance measures - Impedance of arm (left)	2.46e-14	379803	T	C
4304	30664634	2019	Metabolic	Legs-leg fat ratio (female)	2.46e-14	195068	C	T
4285	30804560	2019	Respiratory	PEF	3.25e-14	321047	T	C
4281	30804560	2019	Respiratory	PEF	4.24e-14	345265	T	C
3559	31427789	2019	Activities	Medication for pain relief, constipation, heartburn: Paracetamol	6.21e-14	382089	C	T
3866	27863252	2016	Immunological	Reticulocyte count (two-way meta)	8.64e-14	130388	C	T
3187	31427789	2019	Skeletal	Standing height	1.22e-13	385748	T	C
4071	BioRxiv: https://doi.org/10.1101/261081	2018	Reproduction	Number of sexual partners	1.24e-13	370711	T	C
3873	27863252	2016	Immunological	Sum eosinophil basophil count (three-way meta)	1.26e-13	171771	T	C
3798	29942085	2018	Psychiatric	Worry subcluster	1.37e-13	348219	C	T
3896	27863252	2016	Immunological	Neutrophil percentage of white cells (three-way meta)	1.83e-13	171542	C	T
3195	31427789	2019	Environment	Average total household income before tax	2.1e-13	332594	T	C
4646	31676860	2019	Neurological	Total brain volume	2.28e-13	21821	T	C
3299	31427789	2019	Psychiatric	Frequency of tenseness / restlessness in last 2 weeks	3.37e-13	371869	C	T
3447	31427789	2019	Metabolic	Impedance measures - Impedance of whole body	3.99e-13	379792	T	C
3846	27863252	2016	Immunological	High light scatter reticulocyte count (two-way meta)	4.69e-13	130517	C	T
4545	31676860	2019	Neurological	Total brain volume	5.62e-13	19629	T	C
3450	31427789	2019	Metabolic	Impedance measures - Impedance of arm (right)	9.58e-13	379786	T	C
3285	31427789	2019	Psychiatric	Miserableness	9.91e-13	379907	C	T
3792	30804565	2019	Psychiatric	Daytime napping	2.18e-12	386577	T	C
3286	31427789	2019	Psychiatric	Irritability	3.07e-12	369232	C	T
4692	BioRxiv: https://doi.org/10.1101/288600	2019	Neurological	Anterior limb of internal capsule mean diusivities	3.78e-12	17706	C	T
3992	29500382	2018	Psychiatric	Miserableness (MIS)	4.18e-12	267050	C	T
3263	31427789	2019	Psychiatric	Average weekly champagne plus white wine intake	5.58e-12	273869	T	C
3993	29500382	2018	Psychiatric	Irritability (IRR)	5.89e-12	260369	C	T
4736	BioRxiv: https://doi.org/10.1101/288644	2019	Neurological	Anterior limb of internal capsule radial diusivities	6.83e-12	17706	C	T
3544	31427789	2019	Body Structures	Mouth/teeth dental problems: Mouth ulcers	8.63e-12	385026	C	T
4232	31015401	2019	Environmental	Anilides	9.7e-12	179810	C	T
4068	BioRxiv: https://doi.org/10.1101/261081	2018	Activities	Automobile speeding propensity	1.02e-11	404291	T	C
3885	27863252	2016	Immunological	Lymphocyte percentage of white cells (three-way meta)	1.5e-11	171748	T	C
3271	31427789	2019	Skeletal	Comparative height size at age 10	1.91e-11	380167	T	C
4362	29899525	2018	Activities	Acceleration average	2.6e-11	91084	C	T
3838	27863252	2016	Immunological	Eosinophil count (two-way meta)	2.74e-11	131999	T	C
3726	31427789	2019	Psychiatric	Frequency of consuming six or more units of alcohol	3.27e-11	116394	T	C
4335	30531941	2018	Activities	Overall activity	3.9e-11	91105	C	T
4309	30664745	2019	Skeletal	Osteoarthritis of hip	4.63e-11	393873	C	T
4273	30846698	2019	Psychiatric	Long sleep	6e-11	339926	T	C
3468	31427789	2019	Metabolic	Impedance measures - Trunk fat percentage	6.31e-11	379600	T	C
3627	31427789	2019	Activities	Treatment/medication code: paracetamol	7.65e-11	280443	C	T
1226	27694991	2016	Neurological	Intracranial Volume	1.12e-10	26577	NA	NA
3837	27863252	2016	Immunological	Sum eosinophil basophil count (two-way meta)	2.07e-10	131557	T	C
3339	31427789	2019	Reproduction	Age when periods started (menarche) (female)	2.2e-10	202636	C	T
4744	BioRxiv: https://doi.org/10.1101/288652	2019	Neurological	Fornix (cres) / Stria terminalis radial diusivities	2.57e-10	17706	C	T
3234	31427789	2019	Psychiatric	Daytime dozing / sleeping (narcolepsy)	2.81e-10	384879	T	C
4336	30531941	2018	Activities	Overall activity (conditioning sex and BMI)	2.9e-10	91105	C	T
1187	22451204	2012	Neurological	Parkinson disease	4.63e-10	8477	T	C
55	27089181	2016	Psychiatric	Neuroticism	6.04e-10	170911	C	T
4648	BioRxiv: https://doi.org/10.1101/288556	2019	Neurological	Anterior limb of internal capsule fractional anisotropy	6.08e-10	17706	T	C
3222	31427789	2019	Activities	Drive faster than motorway speed limit	8.38e-10	349848	T	C
3860	27863252	2016	Immunological	Neutrophil percentage of white cells (two-way meta)	9.95e-10	132352	C	T
4698	BioRxiv: https://doi.org/10.1101/288606	2019	Neurological	External capsule mean diusivities	1.02e-09	17706	C	T
3849	27863252	2016	Immunological	Lymphocyte percentage of white cells (two-way meta)	1.47e-09	132570	T	C
4701	BioRxiv: https://doi.org/10.1101/288609	2019	Neurological	Genu of corpus callosum mean diusivities	1.53e-09	17706	C	T
4680	BioRxiv: https://doi.org/10.1101/288588	2019	Neurological	Inferior fronto-occipital fasciculus axial diusivities	2.71e-09	17706	C	T
3872	27863252	2016	Immunological	Sum basophil neutrophil count (three-way meta)	2.78e-09	170143	C	T
4695	BioRxiv: https://doi.org/10.1101/288603	2019	Neurological	Cingulum (cingulate gyrus) mean diusivities	2.88e-09	17706	C	T
3891	27863252	2016	Immunological	Mean platelet volume (three-way meta)	3.39e-09	164454	T	C
3895	27863252	2016	Immunological	Neutrophil count (three-way meta)	3.4e-09	170702	C	T
4688	BioRxiv: https://doi.org/10.1101/288596	2019	Neurological	Superior longitudinal fasciculus axial diusivities	3.99e-09	17706	C	T
3290	31427789	2019	Psychiatric	Worrier / anxious feelings	4.74e-09	376411	C	T
3852	27863252	2016	Immunological	Mean corpuscular volume (two-way meta)	4.77e-09	132353	T	C
4745	BioRxiv: https://doi.org/10.1101/288653	2019	Neurological	Genu of corpus callosum radial diusivities	4.92e-09	17706	C	T
3881	27863252	2016	Immunological	High light scatter percentage of red cells (three-way meta)	5.17e-09	170763	C	T
4272	30846698	2019	Psychiatric	Sleep duration	5.2e-09	446118	T	C
3794	30804565	2019	Psychiatric	Snoring	5.32e-09	359916	C	T
4337	30531941	2018	Psychiatric	Sleep durataion	6.5e-09	91105	T	C
4338	30531941	2018	Psychiatric	Sleep durataion (conditioning sex and BMI)	7.1e-09	91105	T	C
3997	29500382	2018	Psychiatric	Worrier / anxious feelings (WORRY)	7.67e-09	264646	C	T
3229	31427789	2019	Psychiatric	Getting up in morning	8.66e-09	385494	C	T
4737	BioRxiv: https://doi.org/10.1101/288645	2019	Neurological	Average across all tracts radial diusivities	8.87e-09	17706	C	T
4002	29500382	2018	Psychiatric	Guilty feelings (GUILT)	1.01e-08	265139	C	T
4656	BioRxiv: https://doi.org/10.1101/288564	2019	Neurological	Fornix (cres) / Stria terminalis fractional anisotropy	1.06e-08	17706	T	C
3233	31427789	2019	Psychiatric	Snoring	1.09e-08	359498	C	T
3979	28869591	2017	Skeletal	Estimated BMD	1.2e-08	142487	T	C
3409	31427789	2019	Environment	Education - Qualifications	1.24e-08	318526	T	C
3228	31427789	2019	Psychiatric	Sleep duration	1.26e-08	384225	T	C
3314	31427789	2019	Ear, Nose, Throat	Hearing difficulty/problems with background noise	1.53e-08	378722	C	T
4676	BioRxiv: https://doi.org/10.1101/288584	2019	Neurological	External capsule axial diusivities	1.65e-08	17706	C	T
3791	30804565	2019	Psychiatric	Ease of getting up in the morning	1.73e-08	385949	C	T
4657	BioRxiv: https://doi.org/10.1101/288565	2019	Neurological	Genu of corpus callosum fractional anisotropy	2.07e-08	17706	T	C
3261	31427789	2019	Psychiatric	Alcohol intake frequency	2.09e-08	386082	T	C
4693	BioRxiv: https://doi.org/10.1101/288601	2019	Neurological	Average across all tracts mean diusivities	2.12e-08	17706	C	T
3584	31427789	2019	Activities	Types of transport used (excluding work): Cycle	2.17e-08	384551	C	T
3855	27863252	2016	Immunological	Mean platelet volume (two-way meta)	2.84e-08	127230	T	C
3845	27863252	2016	Immunological	High light scatter percentage of red cells (two-way meta)	2.85e-08	130538	C	T
3793	30804565	2019	Psychiatric	Sleep duration	3.07e-08	384317	T	C
3853	27863252	2016	Immunological	Monocyte count (two-way meta)	3.33e-08	131544	C	T
3586	31427789	2019	Activities	Types of physical activity in last 4 weeks: Other exercises (eg: swimming, cycling, keep fit, bowling)	4.46e-08	384450	C	T
3295	31427789	2019	Psychiatric	Guilty feelings	4.6e-08	376361	C	T
4361	30061737	2018	Cardiovascular	Atrial fibrillation	5.27e-08	1030836	C	T
3380	31427789	2019	Cardiovascular	Systolic Blood Pressure (automated reading)	5.68e-08	361402	T	C
3501	31427789	2019	Dermatological	Male-specific factors - Hair/balding pattern: Pattern 2	5.86e-08	176380	C	T
4691	BioRxiv: https://doi.org/10.1101/288599	2019	Neurological	Anterior corona radiata mean diusivities	7.26e-08	17706	C	T
3903	27863252	2016	Immunological	Reticulocyte fraction of red cells (three-way meta)	9.83e-08	170690	C	T
3867	27863252	2016	Immunological	Reticulocyte fraction of red cells (two-way meta)	1.05e-07	130404	C	T
53	27225129	2016	Environment	Educational attainment	1.08e-07	328917	T	C
4266	30929738	2019	Respiratory	Asthma (child-onset)	1.16e-07	314633	T	C
3292	31427789	2019	Psychiatric	Worry too long after embarrassment	1.5e-07	370660	C	T
3999	29500382	2018	Psychiatric	Worry too long after embarrassment (WORR-EMB)	1.53e-07	261094	C	T
3836	27863252	2016	Immunological	Sum basophil neutrophil count (two-way meta)	1.57e-07	131031	C	T
3888	27863252	2016	Immunological	Mean corpuscular volume (three-way meta)	1.86e-07	172433	T	C
3859	27863252	2016	Immunological	Neutrophil count (two-way meta)	1.94e-07	131564	C	T
3718	31427789	2019	Psychiatric	Amount of alcohol drunk on a typical drinking day	2.43e-07	116163	T	C
83	22504420	2012	Skeletal	Lumbar Spine BMD	2.67e-07	31800	C	T
3892	27863252	2016	Immunological	Myeloid white cell count (three-way meta)	2.67e-07	169219	C	T
4218	31015401	2019	Environmental	Antithrombotic agents	2.9e-07	153639	C	T
4742	BioRxiv: https://doi.org/10.1101/288650	2019	Neurological	External capsule radial diusivities	3.14e-07	17706	C	T
4710	BioRxiv: https://doi.org/10.1101/288618	2019	Neurological	Superior longitudinal fasciculus mean diusivities	3.91e-07	17706	C	T
4669	BioRxiv: https://doi.org/10.1101/288577	2019	Neurological	Anterior corona radiata axial diusivities	4.04e-07	17706	C	T
3341	31427789	2019	Reproduction	Number of live births (female)	4.63e-07	208434	C	T
3449	31427789	2019	Metabolic	Impedance measures - Impedance of leg (left)	4.72e-07	379807	T	C
3877	27863252	2016	Immunological	Granulocyte count (three-way meta)	4.97e-07	169822	C	T
4223	31015401	2019	Environmental	Calcium channel blockers	5.7e-07	204378	T	C
3893	27863252	2016	Immunological	Sum neutrophil eosinophil count (three-way meta)	6.18e-07	170384	C	T
4587	31676860	2019	Neurological	Right lingual	6.25e-07	21821	T	C
4537	31676860	2019	Neurological	Right pallidum	6.61e-07	19629	T	C
4228	31015401	2019	Environmental	Anti-inflammatory and antirheumatic products, non-steroids	7e-07	164520	C	T
3785	29942086	2018	Cognitive	Intelligence	7.43e-07	269867	T	C
3887	27863252	2016	Immunological	Mean corpuscular hemoglobin (three-way meta)	8.02e-07	172332	T	C
4366	29899525	2018	Activities	Fraction of accelerations	8.2e-07	90667	C	T
4709	BioRxiv: https://doi.org/10.1101/288617	2019	Neurological	Superior fronto-occipital fasciculus mean diusivities	8.33e-07	17706	C	T
4735	BioRxiv: https://doi.org/10.1101/288643	2019	Neurological	Anterior corona radiata radial diusivities	9.54e-07	17706	C	T
3889	27863252	2016	Immunological	Monocyte count (three-way meta)	1.013e-06	170721	C	T
3781	31427789	2019	Psychiatric	Depression - Trouble falling asleep	1.058e-06	48926	C	T
3469	31427789	2019	Metabolic	Impedance measures - Trunk fat mass	1.158e-06	379578	T	C
3441	31427789	2019	Metabolic	Impedance measures - Body fat percentage	1.187e-06	379615	T	C
3676	31427789	2019	Skeletal	Diagnoses - main ICD10: M16 Osteoarthritis of hip	1.217e-06	300791	C	T
4739	BioRxiv: https://doi.org/10.1101/288647	2019	Neurological	Cingulum (cingulate gyrus) radial diusivities	1.228e-06	17706	C	T
4301	30664634	2019	Metabolic	Arms-arm fat ratio (male)	1.321e-06	167431	C	T
3431	31427789	2019	Cognitive	Fluid intelligence test - Fluid intelligence score	1.397e-06	99739	T	C
4171	29970889	2018	Psychiatric	Loneliness	1.5e-06	445024	C	T
4638	31676860	2019	Neurological	Right pallidum	1.517e-06	21821	T	C
4687	BioRxiv: https://doi.org/10.1101/288595	2019	Neurological	Superior fronto-occipital fasciculus axial diusivities	1.626e-06	17706	C	T
3725	31427789	2019	Psychiatric	Frequency of drinking alcohol	1.692e-06	126656	T	C
4704	BioRxiv: https://doi.org/10.1101/288612	2019	Neurological	Posterior limb of internal capsule mean diusivities	1.788e-06	17706	C	T
4486	31676860	2019	Neurological	Right lingual	1.862e-06	19629	T	C
4708	BioRxiv: https://doi.org/10.1101/288616	2019	Neurological	Superior corona radiata mean diusivities	2.035e-06	17706	C	T
3851	27863252	2016	Immunological	Mean corpuscular hemoglobin (two-way meta)	2.14e-06	132224	T	C
4649	BioRxiv: https://doi.org/10.1101/288557	2019	Neurological	Average across all tracts fractional anisotropy	2.154e-06	17706	T	C
3856	27863252	2016	Immunological	Myeloid white cell count (two-way meta)	2.55e-06	130268	C	T
3343	31427789	2019	Reproduction	Age at first live birth (female)	2.801e-06	141051	T	C
3998	29500382	2018	Psychiatric	Tense / 'highly strung' (TENSE)	2.907e-06	263635	C	T
86	26367794	2015	Skeletal	Lumbar Spine BMD	2.95e-06	32965	T	C
4070	BioRxiv: https://doi.org/10.1101/261081	2018	Psychiatric	Ever smoker	2.974e-06	518633	T	C
4001	29500382	2018	Psychiatric	Loneliness, isolation (LONE)	3.16e-06	267190	C	T
3743	31427789	2019	Psychiatric	Depression - Feelings of worthlessness during worst period of depression	3.471e-06	67012	C	T
4671	BioRxiv: https://doi.org/10.1101/288579	2019	Neurological	Average across all tracts axial diusivities	3.656e-06	17706	C	T
3654	31427789	2019	Psychiatric	Smoking status: Never	3.688e-06	384964	C	T
4556	31676860	2019	Neurological	Left lingual	3.904e-06	21821	T	C
3731	31427789	2019	Psychiatric	Depression - Difficulty concentrating during worst ddepression	3.988e-06	63297	C	T
3291	31427789	2019	Psychiatric	Tense / 'highly strung'	4.683e-06	374129	C	T
3822	26394269	2015	Gastrointestinal	Primary biliary cirrhosis	4.73e-06	13239	T	C
4329	30598549	2018	Body Structures	Fractures	4.8e-06	426795	C	T
3558	31427789	2019	Activities	Medication for pain relief, constipation, heartburn: Ibuprofen (e.g. Nurofen)	4.985e-06	382089	C	T
4093	29844566	2018	Cognitive	Verbal-numerical reasoning	5.134e-06	168033	NA	NA
4305	30664634	2019	Metabolic	Trunk-trunk fat ratio (male)	5.134e-06	167431	T	C
4018	29848360	2018	Skeletal	Systemic Lupus Erythematosus	5.578e-06	10995	NA	NA
3272	31427789	2019	Cognitive	Handedness (chirality/laterality)	5.827e-06	386276	T	C
3448	31427789	2019	Metabolic	Impedance measures - Impedance of leg (right)	5.839e-06	379813	T	C
3841	27863252	2016	Immunological	Granulocyte count (two-way meta)	6.65e-06	130875	C	T
4037	BioRxiv: https://doi.org/10.1101/224774	2017	Psychiatric	Autism spectrum disorder	7.064e-06	46350	C	T
3294	31427789	2019	Psychiatric	Loneliness, isolation	7.373e-06	380317	C	T
177	25673412	2015	Metabolic	Waist circumference (female, adjusted for BMI)	8e-06	127470	C	T
4694	BioRxiv: https://doi.org/10.1101/288602	2019	Neurological	Body of corpus callosum mean diusivities	8.205e-06	17706	C	T
3857	27863252	2016	Immunological	Sum neutrophil eosinophil count (two-way meta)	8.35e-06	131409	C	T
3262	31427789	2019	Psychiatric	Average weekly red wine intake	8.526e-06	274058	T	C
4753	BioRxiv: https://doi.org/10.1101/288661	2019	Neurological	Superior fronto-occipital fasciculus radial diusivities	8.852e-06	17706	C	T
3249	31427789	2019	Nutritional	Lamb/mutton intake	8.88e-06	384188	T	C
178	25673412	2015	Metabolic	Waist circumference (female, adjusted for BMI)	9.1e-06	134039	C	T
4455	31676860	2019	Neurological	Left lingual	9.468e-06	19629	T	C
82	22504420	2012	Skeletal	Lumbar Spine BMD (females)	9.776e-06	31800	C	T
3247	31427789	2019	Nutritional	Poultry intake	1.039e-05	385728	T	C

## Sheet: S9
Supplementary Table 9. rs199515 phenome-wide association study from GWAS ATLAS
atlas ID	PMID	Year	Domain	Trait	P-value	N	EA	NEA
4352	30573740	2018	Dermatological	Male pattern baldness (BOLT LMM non-infinitesimal mixed model)	2.5e-188	205327	C	G
4351	30573740	2018	Dermatological	Male pattern baldness (BOLT LMM infinitesimal mixed model)	8.1e-177	205327	C	G
3500	31427789	2019	Dermatological	Male-specific factors - Hair/balding pattern: Pattern 1	1.4e-71	176380	G	C
3503	31427789	2019	Dermatological	Male-specific factors - Hair/balding pattern: Pattern 4	2.93e-65	176380	C	G
4279	30804560	2019	Respiratory	FVC	2.85e-40	400102	C	G
4282	30804560	2019	Respiratory	FEV1	7.22e-40	321047	C	G
4278	30804560	2019	Respiratory	FEV1	1.91e-39	400102	C	G
4283	30804560	2019	Respiratory	FVC	2.58e-39	321047	C	G
3231	31427789	2019	Psychiatric	Nap during day	1.65e-32	386124	C	G
3900	27863252	2016	Immunological	Red blood cell count (three-way meta)	2.07e-31	172952	G	C
3324	31427789	2019	Reproduction	Relative age of first facial hair (male)	1.73e-30	171805	G	C
3412	31427789	2019	Skeletal	Sitting height	3.81e-29	385393	C	G
4072	BioRxiv: https://doi.org/10.1101/261081	2018	Activities	First PC of the four riskly behaviours	1.75e-26	315894	C	G
3901	27863252	2016	Immunological	Red cell distribution width (three-way meta)	2.45e-26	171529	G	C
3864	27863252	2016	Immunological	Red blood cell count (two-way meta)	4.57e-26	132690	G	C
46	28196072	2017	Dermatological	Baldness	3.34e-25	52874	C	G
3990	29500382	2018	Psychiatric	Neuroticism sum score	4.59e-25	380506	G	C
3879	27863252	2016	Immunological	Hematocrit (three-way meta)	1.07e-23	173039	G	C
3287	31427789	2019	Psychiatric	Sensitivity / hurt feelings	1.77e-23	375272	G	C
3865	27863252	2016	Immunological	Red cell distribution width (two-way meta)	1.99e-23	131520	G	C
3994	29500382	2018	Psychiatric	Sensitivity / hurt feelings (HURT)	7.49e-23	264144	G	C
3795	29942085	2018	Psychiatric	Neuroticism	8.69e-23	390278	NA	NA
3502	31427789	2019	Dermatological	Male-specific factors - Hair/balding pattern: Pattern 3	3.07e-22	176380	C	G
4069	BioRxiv: https://doi.org/10.1101/261081	2018	Psychiatric	Drinks per week	4.64e-22	414343	C	G
3880	27863252	2016	Immunological	Hemoglobin concentration (three-way meta)	7.39e-21	172925	G	C
1226	27694991	2016	Neurological	Intracranial Volume	8.66e-21	26577	NA	NA
4043	30124842	2018	Skeletal	Height	8.9e-20	693529	C	G
3417	31427789	2019	Psychiatric	Neuroticism score	1.2e-19	312740	G	C
4175	30048462	2018	Skeletal	Heel bone mineral density	7.3e-19	394929	C	G
3876	27863252	2016	Immunological	Eosinophil percentage of granulocytes (three-way meta)	1.04e-18	170536	C	G
4087	29255261	2018	Psychiatric	Neuroticism	2.35e-18	329821	G	C
3797	29942085	2018	Psychiatric	Depressive affect subcluster	4.19e-18	357957	G	C
3894	27863252	2016	Immunological	Neutrophil percentage of granulocytes (three-way meta)	5.66e-18	170672	G	C
3844	27863252	2016	Immunological	Hemoglobin concentration (two-way meta)	2.99e-17	132596	G	C
3875	27863252	2016	Immunological	Eosinophil percentage of white cells (three-way meta)	3.51e-17	172378	C	G
3991	29500382	2018	Psychiatric	Mood swings (MOOD)	1.32e-16	265382	G	C
4269	30867560	2019	Psychiatric	Neuroticism general factor	2.45e-16	270059	G	C
3284	31427789	2019	Psychiatric	Mood swings	4.29e-16	377179	G	C
3843	27863252	2016	Immunological	Hematocrit (two-way meta)	7.99e-16	132699	G	C
4306	30664634	2019	Metabolic	Trunk-trunk fat ratio (female)	1.43e-15	195068	C	G
4321	30643256	2019	Psychiatric	Neuroticism (univariate)	1.46e-15	523783	G	C
4167	BioRxiv: https://doi.org/10.1101/388165	2019	Neurological	Parkinson disease of sibling pairs (tier 1)	1.55e-15	482730	C	G
4325	30643256	2019	Psychiatric	Neuroticism (MA GWAMA)	2.33e-15	523783	G	C
4328	30598549	2018	Skeletal	Estimated bone mineral density from heel ultrasounds	5.1e-15	426824	C	G
4317	30643251	2019	Psychiatric	Drinks per day	1.39e-14	537349	C	G
3858	27863252	2016	Immunological	Neutrophil percentage of granulocytes (two-way meta)	1.89e-14	131660	G	C
3840	27863252	2016	Immunological	Eosinophil percentage of granulocytes (two-way meta)	4.52e-14	131525	C	G
3325	31427789	2019	Reproduction	Relative age voice broke (male)	5.14e-14	164394	G	C
3312	31427789	2019	Activities	Electronic device use - Plays computer games	7.46e-14	386152	G	C
4066	30038396	2018	Environment	Educational attainment	7.58e-14	766345	C	G
4071	BioRxiv: https://doi.org/10.1101/261081	2018	Reproduction	Number of sexual partners	2.8e-13	370711	C	G
3570	31427789	2019	Neurological	Pain type(s) experienced in last month: Headache	3.81e-13	385698	G	C
3839	27863252	2016	Immunological	Eosinophil percentage of white cells (two-way meta)	6.52e-13	132052	C	G
3874	27863252	2016	Immunological	Eosinophil count (three-way meta)	8.01e-13	172275	C	G
3995	29500382	2018	Psychiatric	Fed-up feelings (FED_UP)	1.01e-12	266208	G	C
3288	31427789	2019	Psychiatric	Fed-up feelings	1.1e-12	378357	G	C
3902	27863252	2016	Immunological	Reticulocyte count (three-way meta)	2.4e-12	170641	G	C
4304	30664634	2019	Metabolic	Legs-leg fat ratio (female)	2.56e-12	195068	G	C
4068	BioRxiv: https://doi.org/10.1101/261081	2018	Activities	Automobile speeding propensity	2.76e-12	404291	C	G
3792	30804565	2019	Psychiatric	Daytime napping	3.47e-12	386577	C	G
4692	BioRxiv: https://doi.org/10.1101/288600	2019	Neurological	Anterior limb of internal capsule mean diusivities	6.42e-12	17706	G	C
3195	31427789	2019	Environment	Average total household income before tax	9.93e-12	332594	C	G
3996	29500382	2018	Psychiatric	Nervous feelings (NERV-FEEL)	1.19e-11	264858	G	C
4736	BioRxiv: https://doi.org/10.1101/288644	2019	Neurological	Anterior limb of internal capsule radial diusivities	1.21e-11	17706	G	C
4080	30239722	2018	Metabolic	Waist-hip ratio (adjusted for BMI)	1.26e-11	694649	G	C
3289	31427789	2019	Psychiatric	Nervous feelings	1.27e-11	376368	G	C
4646	31676860	2019	Neurological	Total brain volume	1.37e-11	21821	C	G
1187	22451204	2012	Neurological	Parkinson disease	1.55e-11	8477	C	G
3882	27863252	2016	Immunological	High light scatter reticulocyte count (three-way meta)	1.62e-11	170761	G	C
3263	31427789	2019	Psychiatric	Average weekly champagne plus white wine intake	1.94e-11	273869	C	G
4079	30239722	2018	Metabolic	Waist-hip ratio (female)	2.71e-11	381152	G	C
3559	31427789	2019	Activities	Medication for pain relief, constipation, heartburn: Paracetamol	2.82e-11	382089	G	C
3873	27863252	2016	Immunological	Sum eosinophil basophil count (three-way meta)	3.32e-11	171771	C	G
3286	31427789	2019	Psychiatric	Irritability	3.53e-11	369232	G	C
3866	27863252	2016	Immunological	Reticulocyte count (two-way meta)	3.68e-11	130388	G	C
4744	BioRxiv: https://doi.org/10.1101/288652	2019	Neurological	Fornix (cres) / Stria terminalis radial diusivities	3.93e-11	17706	G	C
4285	30804560	2019	Respiratory	PEF	3.96e-11	321047	C	G
4077	30239722	2018	Metabolic	Waist-hip ratio	4.86e-11	697734	G	C
3993	29500382	2018	Psychiatric	Irritability (IRR)	6.15e-11	260369	G	C
3299	31427789	2019	Psychiatric	Frequency of tenseness / restlessness in last 2 weeks	6.21e-11	371869	G	C
4545	31676860	2019	Neurological	Total brain volume	6.68e-11	19629	C	G
4082	30239722	2018	Metabolic	Waist-hip ratio (adjusted for BMI, female)	7.01e-11	379501	G	C
4281	30804560	2019	Respiratory	PEF	8.71e-11	345265	C	G
3846	27863252	2016	Immunological	High light scatter reticulocyte count (two-way meta)	9.94e-11	130517	G	C
3798	29942085	2018	Psychiatric	Worry subcluster	1.02e-10	348219	G	C
3544	31427789	2019	Body Structures	Mouth/teeth dental problems: Mouth ulcers	1.31e-10	385026	G	C
3187	31427789	2019	Skeletal	Standing height	1.38e-10	385748	C	G
3726	31427789	2019	Psychiatric	Frequency of consuming six or more units of alcohol	1.39e-10	116394	C	G
4680	BioRxiv: https://doi.org/10.1101/288588	2019	Neurological	Inferior fronto-occipital fasciculus axial diusivities	1.5e-10	17706	G	C
3852	27863252	2016	Immunological	Mean corpuscular volume (two-way meta)	1.68e-10	132353	C	G
3468	31427789	2019	Metabolic	Impedance measures - Trunk fat percentage	2.26e-10	379600	C	G
3896	27863252	2016	Immunological	Neutrophil percentage of white cells (three-way meta)	2.97e-10	171542	G	C
3285	31427789	2019	Psychiatric	Miserableness	4.31e-10	379907	G	C
3222	31427789	2019	Activities	Drive faster than motorway speed limit	6.14e-10	349848	C	G
3451	31427789	2019	Metabolic	Impedance measures - Impedance of arm (left)	6.48e-10	379803	C	G
3450	31427789	2019	Metabolic	Impedance measures - Impedance of arm (right)	7.95e-10	379786	C	G
4648	BioRxiv: https://doi.org/10.1101/288556	2019	Neurological	Anterior limb of internal capsule fractional anisotropy	8.28e-10	17706	C	G
3447	31427789	2019	Metabolic	Impedance measures - Impedance of whole body	8.37e-10	379792	C	G
3992	29500382	2018	Psychiatric	Miserableness (MIS)	1.09e-09	267050	G	C
4656	BioRxiv: https://doi.org/10.1101/288564	2019	Neurological	Fornix (cres) / Stria terminalis fractional anisotropy	1.39e-09	17706	C	G
3838	27863252	2016	Immunological	Eosinophil count (two-way meta)	1.6e-09	131999	C	G
3501	31427789	2019	Dermatological	Male-specific factors - Hair/balding pattern: Pattern 2	1.73e-09	176380	G	C
3271	31427789	2019	Skeletal	Comparative height size at age 10	2.15e-09	380167	C	G
3627	31427789	2019	Activities	Treatment/medication code: paracetamol	2.89e-09	280443	G	C
3885	27863252	2016	Immunological	Lymphocyte percentage of white cells (three-way meta)	3.37e-09	171748	C	G
4273	30846698	2019	Psychiatric	Long sleep	4e-09	339926	C	G
3837	27863252	2016	Immunological	Sum eosinophil basophil count (two-way meta)	5.07e-09	131557	C	G
3339	31427789	2019	Reproduction	Age when periods started (menarche) (female)	8.88e-09	202636	G	C
3853	27863252	2016	Immunological	Monocyte count (two-way meta)	9.55e-09	131544	G	C
4361	30061737	2018	Cardiovascular	Atrial fibrillation	1.71e-08	1030836	G	C
4067	30038396	2018	Cognitive	Cognitive performance	1.73e-08	257828	C	G
4701	BioRxiv: https://doi.org/10.1101/288609	2019	Neurological	Genu of corpus callosum mean diusivities	1.79e-08	17706	G	C
4688	BioRxiv: https://doi.org/10.1101/288596	2019	Neurological	Superior longitudinal fasciculus axial diusivities	2.15e-08	17706	G	C
335	25772697	2015	Immunological	NKeff:%314-158a+	2.22e-08	669	C	G
4698	BioRxiv: https://doi.org/10.1101/288606	2019	Neurological	External capsule mean diusivities	2.5e-08	17706	G	C
4232	31015401	2019	Environmental	Anilides	2.9e-08	179810	G	C
4272	30846698	2019	Psychiatric	Sleep duration	3.8e-08	446118	C	G
4309	30664745	2019	Skeletal	Osteoarthritis of hip	4.44e-08	393873	G	C
4335	30531941	2018	Activities	Overall activity	4.5e-08	91105	G	C
4676	BioRxiv: https://doi.org/10.1101/288584	2019	Neurological	External capsule axial diusivities	4.7e-08	17706	G	C
3888	27863252	2016	Immunological	Mean corpuscular volume (three-way meta)	4.86e-08	172433	C	G
4362	29899525	2018	Activities	Acceleration average	5.1e-08	91084	G	C
3887	27863252	2016	Immunological	Mean corpuscular hemoglobin (three-way meta)	5.62e-08	172332	C	G
4002	29500382	2018	Psychiatric	Guilty feelings (GUILT)	6.67e-08	265139	G	C
3234	31427789	2019	Psychiatric	Daytime dozing / sleeping (narcolepsy)	7.27e-08	384879	C	G
4695	BioRxiv: https://doi.org/10.1101/288603	2019	Neurological	Cingulum (cingulate gyrus) mean diusivities	7.64e-08	17706	G	C
3290	31427789	2019	Psychiatric	Worrier / anxious feelings	8.32e-08	376411	G	C
3891	27863252	2016	Immunological	Mean platelet volume (three-way meta)	8.49e-08	164454	C	G
3229	31427789	2019	Psychiatric	Getting up in morning	1.14e-07	385494	G	C
3851	27863252	2016	Immunological	Mean corpuscular hemoglobin (two-way meta)	1.18e-07	132224	C	G
3261	31427789	2019	Psychiatric	Alcohol intake frequency	1.2e-07	386082	C	G
3228	31427789	2019	Psychiatric	Sleep duration	1.25e-07	384225	C	G
3997	29500382	2018	Psychiatric	Worrier / anxious feelings (WORRY)	1.29e-07	264646	G	C
53	27225129	2016	Environment	Educational attainment	1.3e-07	328917	C	G
4745	BioRxiv: https://doi.org/10.1101/288653	2019	Neurological	Genu of corpus callosum radial diusivities	1.38e-07	17706	G	C
4336	30531941	2018	Activities	Overall activity (conditioning sex and BMI)	1.6e-07	91105	G	C
4369	30367059	2018	Endocrine	Thyroid-stimulating hormone	1.68e-07	54288	G	C
3791	30804565	2019	Psychiatric	Ease of getting up in the morning	1.77e-07	385949	G	C
3849	27863252	2016	Immunological	Lymphocyte percentage of white cells (two-way meta)	1.87e-07	132570	C	G
3295	31427789	2019	Psychiatric	Guilty feelings	2.12e-07	376361	G	C
4737	BioRxiv: https://doi.org/10.1101/288645	2019	Neurological	Average across all tracts radial diusivities	2.86e-07	17706	G	C
3860	27863252	2016	Immunological	Neutrophil percentage of white cells (two-way meta)	2.87e-07	132352	G	C
3793	30804565	2019	Psychiatric	Sleep duration	3.08e-07	384317	C	G
3584	31427789	2019	Activities	Types of transport used (excluding work): Cycle	3.72e-07	384551	G	C
4537	31676860	2019	Neurological	Right pallidum	3.73e-07	19629	C	G
3889	27863252	2016	Immunological	Monocyte count (three-way meta)	5.09e-07	170721	G	C
3872	27863252	2016	Immunological	Sum basophil neutrophil count (three-way meta)	5.1e-07	170143	G	C
3895	27863252	2016	Immunological	Neutrophil count (three-way meta)	5.33e-07	170702	G	C
3881	27863252	2016	Immunological	High light scatter percentage of red cells (three-way meta)	5.83e-07	170763	G	C
4693	BioRxiv: https://doi.org/10.1101/288601	2019	Neurological	Average across all tracts mean diusivities	6.38e-07	17706	G	C
3932	28878392	2017	Metabolic	Digalactosylation	9.21e-07	2078	NA	NA
3930	28878392	2017	Metabolic	N-glycosylation	1.02e-06	2078	NA	NA
3441	31427789	2019	Metabolic	Impedance measures - Body fat percentage	1.046e-06	379615	C	G
4245	30980028	2019	Cognitive	Left handed	1.08e-06	331037	C	G
3979	28869591	2017	Skeletal	Estimated BMD	1.1e-06	142487	C	G
4657	BioRxiv: https://doi.org/10.1101/288565	2019	Neurological	Genu of corpus callosum fractional anisotropy	1.113e-06	17706	C	G
4266	30929738	2019	Respiratory	Asthma (child-onset)	1.166e-06	314633	C	G
3855	27863252	2016	Immunological	Mean platelet volume (two-way meta)	1.17e-06	127230	C	G
3794	30804565	2019	Psychiatric	Snoring	1.337e-06	359916	G	C
3845	27863252	2016	Immunological	High light scatter percentage of red cells (two-way meta)	1.46e-06	130538	G	C
3781	31427789	2019	Psychiatric	Depression - Trouble falling asleep	1.461e-06	48926	G	C
3469	31427789	2019	Metabolic	Impedance measures - Trunk fat mass	1.496e-06	379578	C	G
4691	BioRxiv: https://doi.org/10.1101/288599	2019	Neurological	Anterior corona radiata mean diusivities	1.677e-06	17706	G	C
3718	31427789	2019	Psychiatric	Amount of alcohol drunk on a typical drinking day	1.764e-06	116163	C	G
3409	31427789	2019	Environment	Education - Qualifications	1.95e-06	318526	C	G
3272	31427789	2019	Cognitive	Handedness (chirality/laterality)	2.117e-06	386276	C	G
3341	31427789	2019	Reproduction	Number of live births (female)	2.135e-06	208434	G	C
4246	30980028	2019	Cognitive	Right handed	2.7e-06	331037	G	C
3233	31427789	2019	Psychiatric	Snoring	2.715e-06	359498	G	C
360	25772697	2015	Immunological	mDC:%32+	2.76e-06	669	C	G
4638	31676860	2019	Neurological	Right pallidum	2.78e-06	21821	C	G
3731	31427789	2019	Psychiatric	Depression - Difficulty concentrating during worst ddepression	2.9e-06	63297	G	C
3586	31427789	2019	Activities	Types of physical activity in last 4 weeks: Other exercises (eg: swimming, cycling, keep fit, bowling)	3.082e-06	384450	G	C
3743	31427789	2019	Psychiatric	Depression - Feelings of worthlessness during worst period of depression	3.455e-06	67012	G	C
4327	30643256	2019	Psychiatric	Well-being spectrum	3.65e-06	2311184	C	G
3314	31427789	2019	Ear, Nose, Throat	Hearing difficulty/problems with background noise	3.653e-06	378722	G	C
4370	30367059	2018	Endocrine	Thyroid-stimulating hormone (male)	4.093e-06	24618	G	C
55	27089181	2016	Psychiatric	Neuroticism	4.605e-06	170911	G	C
3725	31427789	2019	Psychiatric	Frequency of drinking alcohol	4.799e-06	126656	C	G
3867	27863252	2016	Immunological	Reticulocyte fraction of red cells (two-way meta)	5.19e-06	130404	G	C
3903	27863252	2016	Immunological	Reticulocyte fraction of red cells (three-way meta)	5.478e-06	170690	G	C
3654	31427789	2019	Psychiatric	Smoking status: Never	5.841e-06	384964	G	C
4486	31676860	2019	Neurological	Right lingual	6.029e-06	19629	C	G
83	22504420	2012	Skeletal	Lumbar Spine BMD	6.122e-06	31800	G	C
4735	BioRxiv: https://doi.org/10.1101/288643	2019	Neurological	Anterior corona radiata radial diusivities	6.742e-06	17706	G	C
3380	31427789	2019	Cardiovascular	Systolic Blood Pressure (automated reading)	6.793e-06	361402	C	G
4329	30598549	2018	Body Structures	Fractures	7.1e-06	426795	G	C
4337	30531941	2018	Psychiatric	Sleep durataion	7.3e-06	91105	C	G
3859	27863252	2016	Immunological	Neutrophil count (two-way meta)	7.42e-06	131564	G	C
3836	27863252	2016	Immunological	Sum basophil neutrophil count (two-way meta)	7.48e-06	131031	G	C
4338	30531941	2018	Psychiatric	Sleep durataion (conditioning sex and BMI)	7.6e-06	91105	C	G
3449	31427789	2019	Metabolic	Impedance measures - Impedance of leg (left)	7.75e-06	379807	C	G
4587	31676860	2019	Neurological	Right lingual	8.115e-06	21821	C	G
82	22504420	2012	Skeletal	Lumbar Spine BMD (females)	8.6e-06	31800	G	C
3999	29500382	2018	Psychiatric	Worry too long after embarrassment (WORR-EMB)	8.701e-06	261094	G	C
3785	29942086	2018	Cognitive	Intelligence	8.83e-06	269867	C	G
4704	BioRxiv: https://doi.org/10.1101/288612	2019	Neurological	Posterior limb of internal capsule mean diusivities	1.039e-05	17706	G	C
3292	31427789	2019	Psychiatric	Worry too long after embarrassment	1.043e-05	370660	G	C
