# Supplementary material for: Shared Genetic Architecture Between COVID-19 Severity and Alzheimer's Disease Across European and African Ancestries
Source: Research Square preprint supplement (doi:10.21203/rs.3.rs-5619229/v1), 2024-12-24
Supplement: Supplementary file 2 [file dd7870733f83151c59a14e19.xlsx]

## Sheet: Table1. Dataset Information
Table 1.Datasets used in this study
Traits	Ethnic Group	Phenotype/Cohort	Sample Size (Case/Ctrl)	PMID (year)
Alzheimer's Disease Genotyping Data	EA	ADc1234EA (dbGaP phs000168.v2.p2 NIA/LOAD consent 1, 2, 3, 4)	4,314 (2,139/2,175)	19001172 (2008)
		GenADA(dbGaP phs000219.v1.p1)	1,577 (799/778)	19013250 (2009)
	AA	ADc1234AA (dbGaP phs000168.v2.p2 NIA/LOAD consent 1, 2, 3, 4)	251 (124/127)	19001172 (2008)
		Indy(NIAGADS NG00047)	1,175 (173/1,002)	11176911 (2016)
		CIDR(dbGaP phs000378.v1.p1)	1,219 (85/1,134)	11054131 (2000)
AD GWAS Summary Data
Kunkle et al. 2019	EA	stage1(ADGC, CHARGE, EADI, GERAD)	63,929 (21,982/41,944)	30820047 (2019)
Bellenguez et al. 2022		stage1(EADI, ADGC, CHARGE, FinnGen, UKBB-P)	487,511 (85,934/401,577)	35379992 (2022)
Kunkle et al. 2021	AA	IGAP	8,006 (2,784/5,222)	33074286 (2021)
COVID-19 GWAS Summary Data
COVID-19 HGI7 (GWAS data/Base data)	EA	Critical illness (A2)	1,086,211 (13,769/1,072,442)	37674002 (2023)
		Hospitalization (B2)	2,095,324 (32,519/2,062,805)
		Infection (C2)	2,597,856 (122,616/2,475,240)
	AA	Critical illness (A2)	13,196 (628/12,568)
		Hospitalization (B2)	125,814 (2,589/123,225)
		Infection (C2)	137,954(8,814/129,140)
COVID-19 GWAS summary statistics were downloaded from https://www.covid19hg.org/results/r7/ . Target datasets including ADc1234EA, GenADA , ADc1234AA, and CIDR were requested and downloaded via their respective accessions from https://www.ncbi.nlm.nih.gov/gap/. INDY was requested and downloaded from https://www.niagads.org/.

## Sheet: Table2. Demographics + APOE
Table 2. Demographic characteristics of the target data from European and African ancestry and APOE genotypes
			European Ancestry (EA)						African Ancestry (AA)
			ADc1234EA			GenADA			ADc1234AA			INDY			CIDR
			Cases	Controls	Total	Cases	Controls	Total	Cases	Controls	Total	Cases	Controls	Total	Cases	Controls	Total
			2196	2118	4314	799	778	1577	124	127	251	173	1002	1175	85	1134	1219
Age, Mean ± SD			76.9 ± 7.28*	70.68 ± 10.79	73.85 ± 9.68	72.24 ± 8.41**	73.40 ± 7.92	72.81 ± 8.19	77.58 ± 7.85*	69.63 ± 10.29	73.61 ± 9.07	83.60 ± 6.72	82.88 ± 5.31	82.99 ± 5.55	77.18 ± 7.38*	73.98 ± 6.03	74.20 ± 6.19
Male/Female, female(%)			750/1,446(65.8)	833/1,285(60.7)	1,583/2,731(63.3)	339/460(57.6)	276/502(64.5)	615/962(61.0)	41/83(66.9)	43/84(66.1)	84/167(66.5)	65/108(62.4)	339/663(66.2)	404/771(65.6)	18/67(78.8)	409/725(63.9)	427/792(65.0)
APOE	rs429358	T/T, n(%)	773(35.2)	1,386(65.4)	2,159(50.0)	296(37.0)	589(75.7)	885(56.1)	63(50.8)	83(65.4)	146(58.2)	83(48.0)	681(68.0)	764(65.0)	41(48.2)	696(61.4)	737(60.5)
		T/C, n(%)	1,126(51.3)	672(31.7)	1,798(41.7)	397(49.7)	177(22.8)	574(36.4)	48(38.7)	39(30.7)	87(34.7)	73(42.2)	288(28.7)	361(30.7)	37(43.5)	388(34.2)	425(34.9)
		C/C, n(%)	297(13.5)	60(2.8)	357(8.3)	106(13.3)	12(1.5)	118(7.5)	13(10.5)	5(3.9)	18(7.2)	17(9.8)	33(3.3)	50(4.3)	7(8.2)	50(4.4)	57(4.7)
	rs7412	C/C, n(%)	2,056(93.6)	1,856(87.6)	3,912(90.7)	739(92.5)	661(85.0)	1400(88.8)	106(85.5)	116(91.3)	222(88.4)	147(85.0)	771(76.9)	918(78.1)	69(81.2)	908(80.1)	977(80.1)
		C/T, n(%)	138(6.3)	254(12.0)	392(9.1)	60(7.5)	113(14.5)	173(11.0)	18(14.5)	11(8.7)	29(11.6)	25(14.5)	222(22.2)	247(21.0)	15(17.6)	209(18.4)	224(18.4)
		T/T, n(%)	2(0.1)	8(0.4)	10(0.2)	0(0.0)	4(0.5)	4(0.3)	0(0.0)	0(0.0)	0(0.0)	1(0.6)	9(0.9)	10(0.9)	1(1.2)	17(1.5)	18(1.5)
For cases, the “Age” was the age at onset(AAO), while for controls, the “Age” was the age at examination(AAE). To compare the age difference between cases and controls, we conducted a t.test in each cohort. * indicated AAO was much older than AAE in the ADc1234EA (P = 6.26 x 10-104), the ADc1234AA (P = 5.97 x 10-11), and the CIDR (P = 3.96 x 10-6) cohorts. ** indicated AAO was younger than AAE in…

## Sheet: Table 3. EA and AA
Table 3. Significant association between COVID-19 PRSs and AD in EA and AA populations
COVID-19 SNPs weights	Threshold	Unadjusted				Adjusted for sex, age, and APOE
		R2	Pr(>|z|)	ORa (95% CI)		R2	Pr(>|z|)	ORb (95% CI)
EA_A2 critical illness	0.00385005	0.00296143	0.000302966	1.099(1.044-1.157)		0.247572	0.000788852	1.102(1.041-1.167)
EA_B2 hospitalization	0.2062	0.00177525	0.00513902	1.076(1.022-1.132)		0.246701	0.0103727	1.077(1.018-1.140)
EA_C2 infection	0.0420001	0.00585596	3.90067e-07	1.142(1.085-1.203)		0.249715	1.79971e-06	1.149(1.085-1.216)
AA_A2 critical illness	0.4198	0.0753611	6.13465e-27	1.721(1.560-1.902)		0.117687	6.31636e-23	1.690(1.523-1.877)
AA_B2 hospitalization	0.4	0.0118829	2.47181e-05	1.260(1.132-1.402)		0.0667172	8.92841e-05	1.243(1.115-1.386)
AA_C2 infection	0.4575	0.0166634	5.21059e-07	1.310(1.179-1.456)		0.0696728	7.41441e-06	1.282(1.150-1.429)
Genetic association between PRSs of COVID-19 phenotypes and AD diagnosis from PRSice-2 “best-fit” model and logistic regression in EA and AA populations. ; R2: Variance explained by the PRS model; P: p-value of model fit for the association; Coeff: Coefficient of the model; SE: standard error; SNP #: the number of SNPs included in the model at the specified threshold. The threshold, R2, SE, Coeff…

## Sheet: Sheet1
	ENTREZID	SYMBOL
1	1394	CRHR1
2	104909134	CRHR1
3	1394	CRHR1
4	1394	CRHR1
5	1394	CRHR1
6	104909134	CRHR1
7	1394	CRHR1
8	100128977	MAPT-AS1
9	100128977	MAPT-AS1
10	100128977	MAPT-AS1
11	162540	SPPL2C
12	162540	SPPL2C
13	162540	SPPL2C
14	4137	MAPT
15	4137	MAPT
16	4137	MAPT
17	246744	STH
18	246744	STH
19	284058	KANSL1
20	284058	KANSL1
21	284058	KANSL1
22	4905	NSF
23	4905	NSF
24	4905	NSF
25	101929777	WNT3
26	7473	WNT3
27	7473	WNT3
28	101929777	WNT3
29	7473	WNT3
30	100506084	ARL17A
31	51326	ARL17A
32	9884	LRRC37A
33	9884	LRRC37A
